# Supplementary material
Source: publisher site journal article supplement (https://www.dovepress.com/article/593763)
Supplement: Supplementary file 1 [file 593763%20Supplementary%20Material.docx]

Contents

[**Supplementary material 1. Study flowchart** 2](#_Toc231850930)

[**Supplementary material 2. Clinical Cases and LLM Responses** 3](#_Toc231850931)

[Supplementary Table 1. Clinical characteristics and LLM responses of Case 1 3](#_Toc231850932)

[Supplementary Table 2. Clinical characteristics and LLM responses of Case 2 16](#_Toc231850933)

[Supplementary Table 3. Clinical characteristics and LLM responses of Case 3 28](#_Toc231850934)

[Supplementary Table 4. Clinical characteristics and LLM responses of Case 4 38](#_Toc231850935)

[Supplementary Table 5. Clinical characteristics and LLM responses of Case 5 49](#_Toc231850936)

[Supplementary Table 6. Clinical characteristics and LLM responses of Case 6 60](#_Toc231850937)

[Supplementary Table 7. Clinical characteristics and LLM responses of Case 7 72](#_Toc231850938)

[Supplementary Table 8. Clinical characteristics and LLM responses of Case 8 84](#_Toc231850939)

[Supplementary Table 9. Clinical characteristics and LLM responses of Case 9 94](#_Toc231850940)

[Supplementary Table 10. Clinical characteristics and LLM responses of Case 10 104](#_Toc231850941)

[**Supplementary material 3. Prompts for LLM Evaluation** 117](#_Toc231850942)

[**Supplementary material 4. Evaluation Framework** 119](#_Toc231850943)

[Supplementary Table 11. Framework for Clinical Evaluation of Large Language Models 119](#_Toc231850944)

[**Supplementary material 5. Errors in low-order questions by disease** 120](#_Toc231850945)

[Supplementary Table 12. Distribution of disease categories among errors in low-order questions generated by LLMs and doctors 120](#_Toc231850946)

[**Supplementary material 6. Likert Scale Evaluation** 122](#_Toc231850947)

[Supplementary Table 13. Likert Scale Evaluation of LLMs in Real-World Clinical Case Management 122](#_Toc231850948)

[Supplementary Table 14. Likert Scale Evaluation of LLMs in Physician Clinical Decision-Making Support 124](#_Toc231850949)

[Supplementary Table 15. Comparative analysis of Likert scale scores among physicians, LLMs, and physicians assisted by LLMs 126](#_Toc231850950)

# **Supplementary material 1. Study flowchart**


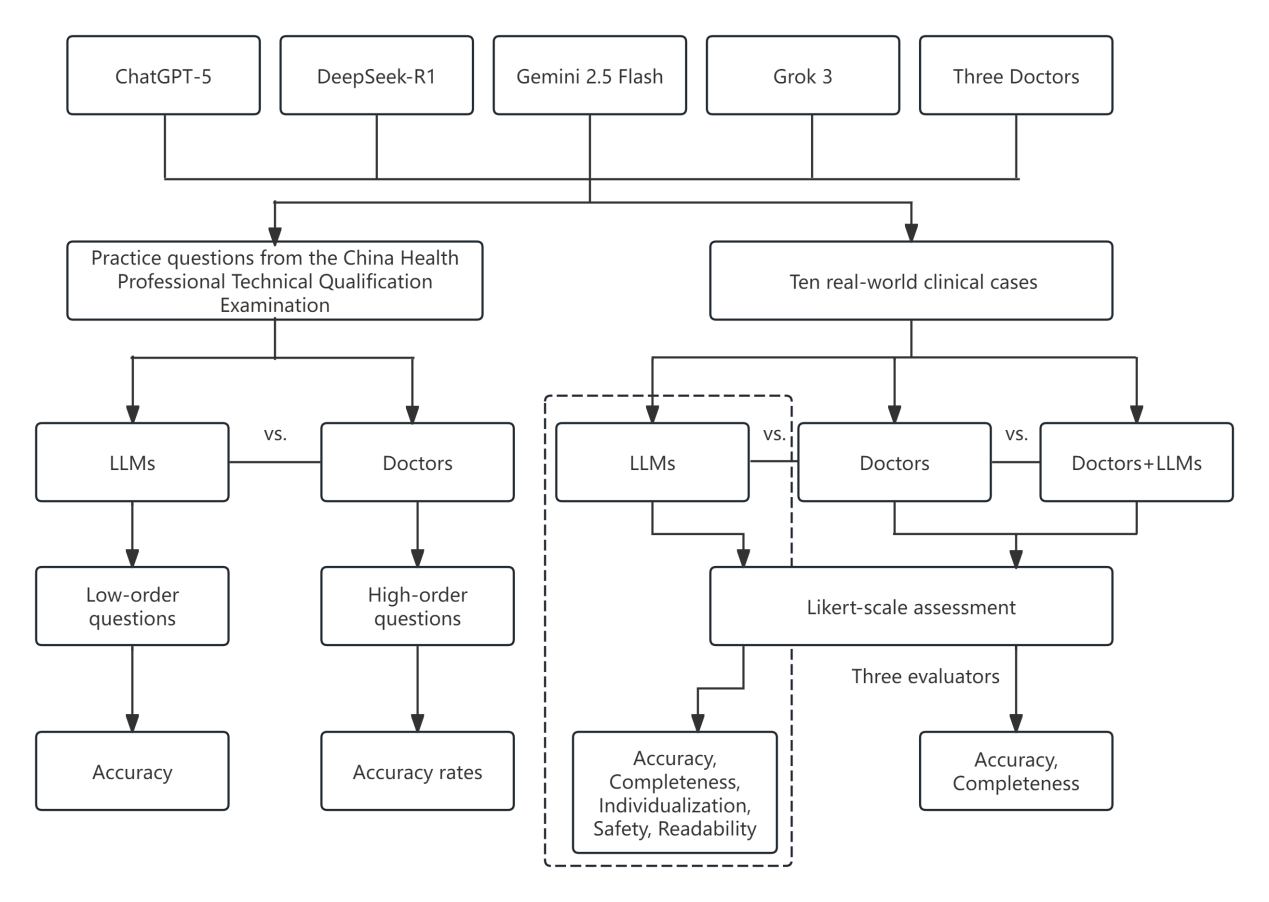


Supplementary Figure 1. Flowchart of overall study design

# **Supplementary material 2. Clinical Cases and LLM Responses**

## Supplementary Table 1. Clinical characteristics and LLM responses of Case 1

| Medical history summary | A male in his mid 70s was admitted to the hospital due to repeated coughing, phlegm production, chest tightness, and shortness of breath for more than 10 years, which worsened for half a month. The patient has a history of chronic obstructive pulmonary disease, recurrent coughing and wheezing for more than 10 years, and has been inhaling budesonide, clotrimazole bromide, formoterol aerosol, and home oxygen therapy for a long time. Half a month ago, chest tightness and shortness of breath worsened, accompanied by cough, sputum, fever, and inability to relieve with home oxygen therapy. Therefore, he came to the hospital for treatment and tested positive for H1N1 influenza antigen. CT scan of the lungs showed scattered exudation in both lungs, and he was treated with etapenem, Sufuda antiviral, methylprednisolone 40mg qd for 5 days. After that，the chest tightness and shortness of breath improved. Two days ago, the patient came to the outpatient department for a follow-up examination. The blood test showed white blood cell count was 24.6×10 ^ 9/L，and whole blood CRP was 103.6 mg/L. The CT scan of the lungs showed poor absorption compared to before. Smoking history of over 30 years, taking 20 cigarettes per day, and not quitting smoking. The CT manifestations of its lungs are shown in the following figure | |
| --- | --- | --- |
| Laboratory and imaging findings | Total IgE: 33.1IU/mL; Aspergillus IgG antibody detection: 500.00; Erythrocyte sedimentation rate: 69.00 mm/h; T cell test for tuberculosis infection was positve: MTB antigen (ESAT-6): 18 spots, MTB antigen (CFP-10): 41 spots；Cryptococcus antigen in bronchoalveolar lavage fluid was negative，and also negative for Mycobacterium tuberculosis; the fungal G+GM test in bronchoalveolar lavage fluid showed fungal 1-3- β - D-glucan (G): 134 pg/ml; Fungal Aspergillus galactomannan (GM) 0.10; Alveolar lavage fluid NGS showed Pseudomonas aeruginosa sequence number 7, Aspergillus fumigatus sequence number 12, Pneumocystis jirovecii sequence number 16 | |
| Answers | Preliminary Diagnosis and Investigations Strategy | Treatment Strategy |
| DeepSeek-R1 | Top Three Likely Infectious Diagnoses in Order of Probability  1. Bacterial Pneumonia (Secondary to COPD Exacerbation)  Rationale:  The patient’s history of COPD, chronic smoking, and acute worsening of respiratory symptoms (increased sputum, fever, elevated WBC [24.6 ×10⁹/L], and CRP [103.6 mg/L]) strongly suggest a bacterial superinfection. COPD exacerbations are frequently triggered by bacterial pathogens such as Streptococcus pneumoniae, Haemophilus influenzae, or Moraxella catarrhalis. Despite initial improvement with ertapenem (a carbapenem), persistent inflammation on CT and elevated biomarkers indicate possible antibiotic resistance (e.g., Pseudomonas aeruginosa in chronic COPD) or incomplete pathogen coverage.  2. Influenza A (H1N1) Pneumonia with Secondary Bacterial Co-infection  Rationale:  The patient tested positive for H1N1 influenza antigen, which is a known trigger for severe viral pneumonia and secondary bacterial infections (e.g., Staphylococcus aureus or S. pneumoniae). While antiviral therapy (e.g., Sufuda) may reduce viral replication, immunosenescence in elderly COPD patients and prolonged steroid use (methylprednisolone) can impair viral clearance and increase bacterial colonization risk. The partial response to steroids and antibiotics supports a mixed viral-bacterial etiology.  3. Atypical Pneumonia (e.g., Mycoplasma pneumoniae or Legionella pneumophila)  Rationale:  Non-resolving infiltrates despite broad-spectrum antibiotics (ertapenem) raise suspicion for atypical pathogens, which are not covered by carbapenems. Mycoplasma or Legionella infections are less common in COPD exacerbations but can occur in immunocompromised hosts or those with structural lung damage. Elevated CRP and neutrophilia may also align with Legionella, which often causes severe inflammation.   Next Steps in Diagnostic Evaluation  1. Microbiological Workup   - Sputum Culture and Gram Stain: Prioritize for bacterial identification (e.g., Pseudomonas, S. aureus) and antibiotic susceptibility.   - Blood Cultures: Rule out bacteremia, particularly if sepsis is suspected.   - Respiratory Viral PCR Panel: Confirm ongoing H1N1 replication or detect co-infecting viruses (e.g., RSV, rhinovirus).   - Atypical Pathogen Testing:   - Urinary antigen for Legionella pneumophila.   - Serology or PCR for Mycoplasma pneumoniae.  2. Imaging and Biomarkers   - High-Resolution CT (HRCT): Assess for new consolidations, cavitations, or patterns suggestive of fungal infection (e.g., aspergilloma in COPD).   - Procalcitonin (PCT): Differentiate bacterial vs. viral etiology; elevated PCT supports bacterial infection.  3. Immunocompromise Evaluation   - Fungal Workup: Consider Aspergillus antigen (galactomannan) in BAL or serum, given prolonged steroid use and poor CT resolution.   - Pneumocystis jirovecii PCR: If hypoxemia worsens, though less likely in this context.  4. Cardiopulmonary Assessment   - Echocardiography: Exclude decompensated right heart failure (cor pulmonale) due to COPD exacerbation.   - D-dimer and CT Pulmonary Angiography: Rule out pulmonary embolism, given persistent dyspnea and COPD-related hypercoagulability.    Key Considerations  - Antibiotic Resistance: Prior ertapenem use may select for ESBL-producing Enterobacteriaceae or carbapenem-resistant Pseudomonas.  - Host Factors: Age, COPD severity (GOLD 3–4), and smoking history increase susceptibility to polymicrobial infections.  - Steroid Impact: Methylprednisolone may mask symptoms of ongoing infection, necessitating aggressive diagnostic follow-up.  This structured approach balances likelihood, pathogen virulence, and host vulnerability to optimize diagnostic yield. | Tailored Antimicrobial Treatment Plan  Based on the clinical context, prior therapies, and new diagnostic findings (Pseudomonas aeruginosa, Aspergillus fumigatus, and Pneumocystis jirovecii detected in BAL NGS), the following regimen addresses co-existing bacterial, fungal, and opportunistic infections.   1. Antibiotic for Pseudomonas aeruginosa Pneumonia  Drug of Choice:  - Ceftazidime/Avibactam (2.5 g IV q8h) OR Meropenem (2 g IV q8h)   - Rationale: Both cover Pseudomonas with enhanced activity against carbapenem-resistant strains (given prior ertapenem exposure). Avibactam extends coverage to ESBL/AmpC-producing strains.  Adjunctive Therapy:  - Tobramycin (7 mg/kg IV q24h, adjusted for renal function)   - Synergistic with β-lactams for severe Pseudomonas infections. Monitor trough levels (target <1 µg/mL) to avoid nephrotoxicity.  Duration: 10–14 days, guided by clinical response and repeat BAL cultures.    2. Antifungal Therapy for Aspergillus fumigatus  First-Line:  - Voriconazole (6 mg/kg IV q12h for 24h, then 4 mg/kg IV q12h; transition to oral 200 mg q12h if improving)  - Rationale: Gold standard for invasive pulmonary aspergillosis. BAL galactomannan (GM) is negative, but elevated β-D-glucan (134 pg/mL) and Aspergillus IgG (500 IU/mL) suggest chronic or subacute infection.  Alternative for Renal Insufficiency:  - Isavuconazole (200 mg IV/PO q8h for 48h, then 200 mg q24h)   - Preferred if voriconazole interactions (e.g., with corticosteroids) or hepatic toxicity are concerns.  Duration: Minimum 6–12 weeks, depending on resolution of infiltrates and biomarkers (e.g., CRP, β-D-glucan).   3. Anti-Pneumocystis jirovecii Therapy  First-Line:  - Trimethoprim-Sulfamethoxazole (TMP-SMX) (15–20 mg/kg/day TMP component, divided q6–8h IV)  - Rationale: High sequence count (16) in BAL NGS confirms active infection. Steroid use and COPD-related immunosuppression increase Pneumocystis risk.  Alternative for Sulfa Allergy:  - Clindamycin (900 mg IV q8h) + Primaquine (30 mg PO q24h)  - Requires G6PD testing before primaquine.  Adjunctive Corticosteroids:  - Prednisone (40 mg PO q12h x 5d, then 40 mg q24h x 5d, then 20 mg q24h x 11d) if hypoxemic (PaO₂ <70 mmHg).  Duration: 21 days total.   Key Adjustments & Monitoring  1. Drug Interactions:   - Voriconazole increases methylprednisolone exposure; taper steroids aggressively to avoid adrenal suppression.   - Avoid azole antifungals with QT-prolonging agents (e.g., macrolides).  2. Renal/Hepatic Monitoring:   - Adjust tobramycin dose for creatinine clearance (target trough <1 µg/mL).   - Check voriconazole levels (target 2–5 µg/mL) due to nonlinear pharmacokinetics in elderly patients.  3. Follow-Up Diagnostics:   - Repeat BAL in 7 days to assess fungal burden (β-D-glucan/GM) and bacterial clearance.   - Serial CRP/ESR to track inflammation.  4. TB Consideration:   - Positive T-cell test (ESAT-6/CFP-10) suggests latent TB. Rule out active TB with repeat AFB smears/PCR. If confirmed, initiate rifampin-based regimen (caution with voriconazole interaction).    Rationale for Multitarget Therapy  - Pseudomonas: Likely driver of neutrophilic inflammation (WBC 24.6 ×10⁹/L, CRP 103.6 mg/L).  - Aspergillus: Elevated IgG and β-D-glucan indicate chronic colonization progressing to infection in a steroid-exposed host.  - Pneumocystis: Opportunistic pathogen unmasked by immunosuppression (steroids, COPD).  This regimen balances broad-spectrum coverage, drug pharmacokinetics, and host frailty. Escalate to ID/antimicrobial stewardship review for complex resistance or toxicity. |
| ChatGPT-5 | Based on the clinical presentation, laboratory findings, and chest CT imaging (which demonstrates diffuse bilateral bronchial wall thickening, centrilobular nodularity, patchy consolidations, and areas of tree-in-bud opacities), the following are the three most likely infectious diagnoses, arranged in order of probability: 1. Chronic Pulmonary Aspergillosis (CPA), likely Chronic Cavitary Pulmonary Aspergillosis (CCPA) Rationale: The patient has underlying COPD, prolonged steroid use, and structural lung disease—all major risk factors for CPA. The CT image shows bilateral upper lobe-predominant cavitary lesions, peribronchial infiltrates, and tree-in-bud patterns suggestive of small airway involvement, all compatible with CPA. The subacute to chronic course over months to years with persistent radiological abnormalities despite antibacterial and antiviral therapy supports this. 2. Nontuberculous Mycobacterial Pulmonary Disease (NTM-PD), especially Mycobacterium avium complex (MAC) Rationale: Imaging reveals bronchiectasis with tree-in-bud appearance, classic for nodular-bronchiectatic NTM-PD. The patient has a long-standing history of COPD and corticosteroid use, which are known risk factors. The poor clinical and radiographic response to antibacterial therapy (despite a high WBC and CRP) raises suspicion for a slow-growing mycobacterial etiology. 3. Secondary Bacterial Infection Post-Influenza, likely Pseudomonas aeruginosa or other resistant Gram-negatives Rationale: The acute worsening of symptoms after H1N1 infection, followed by poor radiographic resolution and elevated inflammatory markers, supports a superimposed bacterial infection. His extensive prior antibiotic use (ertapenem) and structural lung damage place him at high risk for nosocomial or MDR organisms, particularly P. aeruginosa. The pattern of airspace consolidation, while partially treated, may still reflect persistent bacterial pneumonia. Next Diagnostic Plan Microbiological Investigations: Sputum fungal culture, Aspergillus-specific IgG (or galactomannan if bronchoscopy feasible). AFB smear, culture, and PCR for NTM on at least 3 early morning sputum samples. Repeat sputum Gram stain and culture, including extended-spectrum beta-lactamase (ESBL) and carbapenemase testing. Respiratory viral PCR panel to rule out concurrent viral pathogens beyond H1N1. Consider bronchoscopy with BAL for comprehensive sampling (including bacterial, mycobacterial, fungal cultures, and cytology). Radiological Comparison: Serial CT imaging to assess evolution of cavities, bronchiectasis, or nodular infiltrates. Immunological Assessment: Total IgE, eosinophil count (to assess for ABPA overlap if allergic bronchopulmonary involvement suspected). Evaluate for underlying immune suppression, particularly given prolonged corticosteroid use. Pulmonary Function Testing (once stabilized): To characterize degree of airway obstruction and tailor chronic management. | Given the comprehensive microbiological and immunological results, the patient presents with co-infections in the setting of chronic lung disease and corticosteroid exposure. The findings support the diagnosis of chronic pulmonary aspergillosis (CPA) with Aspergillus fumigatus, superimposed bacterial pneumonia with Pseudomonas aeruginosa, and possible colonization vs early Pneumocystis jirovecii pneumonia (PJP). The T-SPOT positivity without microbiological confirmation of active TB suggests latent or past infection.   Primary Diagnoses for Targeted Therapy  1. Chronic Cavitary Pulmonary Aspergillosis (CCPA)  2. Chronic pseudomonal infection in COPD  3. Low-level Pneumocystis jirovecii detection – likely colonization  4. Latent TB infection (LTBI) – does not require immediate treatment now unless immunosuppression intensifies.   Interpretation Highlights: - Aspergillus IgG: 500 IU/mL – strongly supports CPA - BAL GM: 0.10, G: 134 pg/mL – borderline/low-level, does not exclude CPA - NGS in BAL shows low-level Pseudomonas (7 reads), Aspergillus (12 reads), and P. jirovecii (16 reads) – consistent with mixed microbial flora, likely reflecting chronic colonization vs active low-grade infection, especially in a COPD background. - Cryptococcus and MTB PCR: negative - T-SPOT positive but no evidence of active TB.   Recommended Antibiotic and Antifungal Therapy  1. For Chronic Pulmonary Aspergillosis (CCPA) - Drug: Voriconazole - Dosage:   - Loading: 6 mg/kg IV q12h x 2 doses (or 400 mg PO q12h x 2 doses)   - Maintenance: 4 mg/kg IV q12h (or 200 mg PO q12h)  - Therapeutic Drug Monitoring (TDM):   - Target trough: 1–5.5 µg/mL - Duration: At least 6 months, longer based on response and radiologic improvement  - Rationale: Voriconazole is first-line therapy per IDSA and ESCMID guidelines; elevated Aspergillus IgG and radiologic features support this diagnosis.   2. For Pseudomonas aeruginosa (chronic infection in COPD) - Drug: Levofloxacin - Dosage: 750 mg PO/IV once daily - Duration: 10–14 days - Alternative (if recent fluoroquinolone use or resistance concerns):   - Ceftazidime 2g IV q8h or   - Cefepime 2g IV q8h, guided by culture/susceptibility - Rationale: Given low copy number in NGS, this may represent chronic colonization; however, elevated WBC/CRP and radiologic progression suggest potential exacerbation. Fluoroquinolones are preferred in outpatient/step-down settings.   3. For Pneumocystis jirovecii (Likely Colonization) - No immediate treatment is recommended unless:   - The patient becomes hypoxemic,   - Imaging evolves to show ground-glass opacities, or   - There is a significant rise in (1→3)-β-D-glucan  - If treatment is initiated (precautionary in immunocompromised host):  - Drug: TMP-SMX (Bactrim)   - Dosage: 15–20 mg/kg/day TMP component IV/PO in 3 divided doses   - Duration: 21 days   - Consider adding steroids if PaO2 <70 mmHg or A-a gradient >35   4. Latent TB Infection - No active TB evident, T-SPOT may reflect latent TB; no treatment required unless future immunosuppression is planned (e.g., >15 mg/d prednisone daily >1 month)  Would you like assistance with a monitoring plan (lab and imaging timeline), or input on tapering corticosteroids given the fungal infections? |
| Grok 3 | Based on the clinical presentation, laboratory findings, and high-resolution computed tomography (HRCT) scan of the chest, below are the three most likely infectious disease diagnoses for this male patient in his mid 70s, arranged in order of possibility. Each diagnosis is supported by a concise rationale grounded in current scientific evidence, followed by the recommended next step in examination.   1. Bacterial Pneumonia (Secondary to H1N1 Influenza or Nosocomial Pathogens) Reasons: The patient’s significantly elevated white blood cell count (24.6 × 10^9/L) and C-reactive protein (CRP) level (103.6 mg/L) indicate a robust acute inflammatory response, strongly suggestive of bacterial superinfection, a frequent complication following H1N1 influenza in elderly patients with chronic obstructive pulmonary disease (COPD). The HRCT findings of persistent patchy consolidations and poor absorption of prior exudative changes, despite treatment with ertapenem, point toward a resistant pathogen (e.g., Staphylococcus aureus, Streptococcus pneumoniae) or a nosocomial infection acquired during hospitalization, consistent with the patient’s recent H1N1 positivity and prolonged hospital exposure. This aligns with documented patterns of post-viral bacterial pneumonia in immunocompromised populations. Next Plan in Examination: Perform bronchoalveolar lavage (BAL) with quantitative cultures and polymerase chain reaction (PCR) testing for a broad panel of respiratory pathogens, including resistant bacteria (e.g., methicillin-resistant S. aureus [MRSA], Pseudomonas aeruginosa), atypical organisms (e.g., Mycoplasma pneumoniae, Legionella spp.), and viral agents, to pinpoint the causative pathogen and refine the diagnostic approach.   2. H1N1 Influenza with Prolonged Viral Pneumonia Reasons: The initial H1N1 antigen positivity and HRCT findings of ground-glass opacities and consolidations are hallmarks of viral pneumonitis, which can persist or recur in elderly patients with COPD, particularly those on chronic corticosteroids like budesonide and recent methylprednisolone. The lack of significant resolution of exudative changes despite oseltamivir therapy suggests a protracted viral course or immune dysregulation, though the markedly elevated inflammatory markers make this less likely than bacterial superinfection. This diagnosis remains plausible given the patient’s advanced age and underlying immunosuppression. Next Plan in Examination: Conduct an immunological workup, including procalcitonin levels, interleukin-6 (IL-6), and lymphocyte subset analysis, to distinguish between prolonged viral inflammation and bacterial superinfection, accounting for the confounding effects of corticosteroid use and COPD-related immune compromise.   3. Aspiration Pneumonia Reasons: The patient’s age, chronic respiratory impairment from COPD, long-term home oxygen use, and potential for swallowing dysfunction (inferred from his clinical decline) elevate the risk of aspiration, which can manifest as bilateral patchy consolidations and ground-glass opacities on HRCT, especially in dependent lobes. The poor resolution of CT findings could indicate ongoing microaspiration or a polymicrobial process, though this is less probable than the above diagnoses without a clear history of aspiration or focal imaging signs. It remains a differential consideration given his risk profile. Next Plan in Examination: Refer the patient for a speech and language therapy assessment or videofluoroscopic swallow study to evaluate for aspiration risk, providing clarity on this potential etiology in the context of his chronic lung disease and clinical course.   Diagnostic Prioritization Bacterial pneumonia secondary to H1N1 or nosocomial pathogens is the leading diagnosis due to the acute inflammatory markers and persistent CT findings suggestive of an unresolved bacterial process. Prolonged H1N1 viral pneumonia is a compelling alternative, supported by the patient’s viral history and imaging, but is less favored given the leukocytosis and CRP elevation. Aspiration pneumonia, while possible, ranks lower without specific clinical or radiologic evidence of aspiration. These recommendations are informed by current Infectious Diseases Society of America (IDSA) and American Thoracic Society (ATS) guidelines for managing complex pneumonia in elderly patients with chronic lung disease. | Based on the provided lab results and clinical context, the best antibiotic treatment plan needs to address the most likely pathogens contributing to the patient's condition. Below is the recommended treatment, including drug choice, dosage, and duration, derived from the analysis of the laboratory findings and clinical scenario.  Clinical Context and Lab Interpretation - Patient Background: History of COPD, recent H1N1 influenza, treated with antibiotics (ertapenem) and antivirals, now showing worsening symptoms with elevated white blood cell count (WBC) and C-reactive protein (CRP), and poor absorption on CT scan. - Key Lab Findings:  - Total IgE: 33.1 IU/mL - Normal, ruling out significant allergic conditions like ABPA.  - Aspergillus IgG: 500.00 (elevated) - Suggests exposure to Aspergillus, possibly chronic pulmonary aspergillosis (CPA), but needs clinical correlation.  - ESR: 69.00 mm/h (elevated) - Indicates inflammation, non-specific.  - T cell test for TB: Positive (ESAT-6: 18 spots, CFP-10: 41 spots) - Suggests latent TB, but BAL negative for Mycobacterium tuberculosis reduces likelihood of active TB.  - Cryptococcus antigen in BAL: Negative - Rules out cryptococcal infection.  - Fungal G test: 134 pg/mL (elevated) - Indicates fungal infection (e.g., Pneumocystis, Aspergillus), as values above 80-100 pg/mL are typically positive.  - Aspergillus GM: 0.10 (normal) - Negative, reducing likelihood of invasive aspergillosis.  - BAL NGS:   - Pseudomonas aeruginosa (7 sequences) - Possible bacterial infection, common in COPD.  - Aspergillus fumigatus (12 sequences) - Potential fungal involvement, though low sequence number suggests colonization or mild infection.  - Pneumocystis jirovecii (16 sequences) - Opportunistic infection risk, especially with steroid use.  Likely Pathogens 1. Pseudomonas aeruginosa: A common pathogen in COPD exacerbations, supported by NGS and clinical worsening despite prior ertapenem (which has suboptimal Pseudomonas coverage). 2. Pneumocystis jirovecii: Elevated G test and NGS sequences, combined with immunosuppression (budesonide and recent methylprednisolone), suggest Pneumocystis pneumonia (PCP) as a co-infection.  Treatment Plan Given the evidence, a dual-therapy approach targeting both bacterial and fungal pathogens is warranted.  1. For Pseudomonas aeruginosa - Drug Choice: Piperacillin-tazobactam  - Rationale: Broad-spectrum anti-Pseudomonas activity, effective in COPD-related infections, and suitable given potential ertapenem resistance. - Dosage: 4.5 g IV every 6 hours  - Adjust for renal function if necessary. - Duration: 10-14 days  - Based on clinical response and repeat cultures, as complicated COPD infections may require extended treatment.  2. For Pneumocystis jirovecii - Drug Choice: Trimethoprim-sulfamethoxazole (TMP-SMX)  - Rationale: First-line treatment for PCP, supported by G test positivity and NGS findings. - Dosage: 15-20 mg/kg/day of TMP component, IV, divided into 3-4 doses  - Example: For a 70 kg patient, 1050-1400 mg TMP/day (approximately 5-7 double-strength tablets equivalent, but IV preferred for severity). - Duration: 21 days  - Standard duration for PCP treatment.  Additional Considerations - Aspergillus: Elevated IgG and NGS sequences suggest possible colonization or chronic infection, but negative GM and low sequence numbers make immediate antifungal treatment (e.g., voriconazole) unnecessary unless clinical worsening or CT findings (e.g., cavities) suggest CPA. - Tuberculosis: Positive T cell test likely indicates latent TB; active TB is unlikely with negative BAL. Monitor clinically, but TB treatment is not indicated now. - Supportive Care: Continue COPD management (e.g., budesonide), adjust steroids if PCP severity warrants (e.g., prednisone for hypoxemia), and provide oxygen as needed.  Antibiotic Treatment Plan  For Pseudomonas aeruginosa - Drug: Piperacillin-tazobactam  - Dosage: 4.5 g IV every 6 hours  - Duration: 10-14 days   For Pneumocystis jirovecii - Drug: Trimethoprim-sulfamethoxazole (TMP-SMX)  - Dosage: 15-20 mg/kg/day of TMP component, IV, divided into 3-4 doses  - Duration: 21 days |
| Gemini 2.5 Flash | Based on the clinical presentation and laboratory findings of this male patient in his mid 70s, I will provide a differential diagnosis for his persistent respiratory symptoms and elevated inflammatory markers. The patient's history of severe chronic obstructive pulmonary disease (COPD) and recent H1N1 influenza A infection, coupled with a lack of clinical and radiological improvement despite initial therapy, warrants a thorough investigation for secondary infectious etiologies. Differential Diagnosis 1. Bacterial Superinfection: This is the most probable diagnosis. The patient's initial viral pneumonia (H1N1) likely predisposed him to a secondary bacterial infection. The significant leukocytosis (24.6 × 10^9/L) and markedly elevated C-reactive protein (CRP) (103.6 mg/L) are highly suggestive of a bacterial process rather than an ongoing viral one. Furthermore, the persistent and worsening pulmonary infiltrates on CT, despite initial improvement of some symptoms with therapy, strongly support this diagnosis. Common pathogens in this context include Streptococcus pneumoniae, Haemophilus influenzae, and Moraxella catarrhalis, given the patient's underlying COPD. 2. Fungal Superinfection: This is a strong consideration, especially given the patient's prolonged use of inhaled corticosteroids and recent course of high-dose systemic corticosteroids (methylprednisolone 40mg qd x 5 days). These factors significantly increase the risk of opportunistic fungal infections, such as invasive pulmonary aspergillosis (IPA). Although the patient's symptoms are nonspecific, the lack of resolution despite a course of broad-spectrum antibiotics (etapenem) and the presence of new or persistent infiltrates on imaging raise suspicion. The typical host factors for IPA are present, and the radiologic findings can be variable, making it a critical consideration in this context. 3. Tuberculosis (TB) Reactivation: This is a plausible, albeit less common, diagnosis. The patient's history of smoking and COPD are risk factors for latent TB reactivation. While the clinical presentation is consistent with a bacterial superinfection, TB should be included in the differential, especially in a patient with a chronic respiratory condition and poor response to initial therapy. The CT findings of chronic changes with new infiltrates could be compatible with TB, and a definitive diagnosis requires specific testing. Proposed Next Steps in Examination 1. Sputum Analysis and Culture:  Obtain a deep sputum sample for Gram stain, acid-fast bacilli (AFB) stain, bacterial culture with susceptibility testing, and fungal culture.  This is the most critical next step to identify the causative organism for the likely bacterial superinfection.  A positive AFB stain would support the diagnosis of TB, while a positive bacterial or fungal culture would direct specific antimicrobial therapy. 2. Diagnostic Bronchoscopy with Bronchoalveolar Lavage (BAL):  Consider this procedure if a good quality sputum sample cannot be obtained or if initial cultures are negative.  BAL fluid should be sent for bacterial culture, fungal culture (including galactomannan and beta-D-glucan assays), and mycobacterial smear and culture.  The galactomannan assay in BAL fluid is a highly sensitive and specific test for diagnosing invasive pulmonary aspergillosis. 3. Blood Investigations:  Draw blood for a serum galactomannan assay and \beta-D-glucan test to further investigate for invasive fungal disease.  Also, obtain a QuantiFERON-TB Gold or T-SPOT.TB test to screen for latent TB infection.  Repeat complete blood count (CBC) and C-reactive protein (CRP) to monitor inflammatory markers and response to treatment. | Based on the updated diagnostic information, including the chest CT image and the results of the bronchoalveolar lavage (BAL) fluid analysis, the patient's clinical picture is one of a complex, multi-pathogen respiratory co-infection. The initial differential diagnosis of a bacterial superinfection and invasive fungal disease is strongly supported, with the added complexity of a positive T-cell test for TB. The provided chest CT image shows extensive, bilateral patchy and nodular consolidation with what appears to be cavitation and "tree-in-bud" opacities, which can be seen in various infectious processes, including bacterial, fungal, and mycobacterial diseases. The BAL fluid analysis provides crucial data:  Bacterial: Pseudomonas aeruginosa sequence number 7. While this is a low count, in the context of a patient with severe COPD, chronic colonization is common and can be a significant co-pathogen in exacerbations.  Fungal: The BAL fungal 1-3-beta-D-glucan (G) level of 134 pg/ml is elevated and strongly suggests a fungal infection. The presence of Aspergillus fumigatus sequences (number 12) from next-generation sequencing (NGS) and the highly elevated Aspergillus IgG antibody (500.00) are highly compelling evidence of an aspergillus-related disease. This is likely chronic pulmonary aspergillosis (CPA) or a subacute form of invasive pulmonary aspergillosis (IPA) given his immunosuppression from steroids and underlying lung disease.  Atypical: Pneumocystis jirovecii sequences (number 16) were also detected. While this can sometimes represent colonization in a COPD patient, given his recent steroid use, the possibility of Pneumocystis jirovecii pneumonia (PJP) cannot be excluded. The elevated G-test also supports this diagnosis, as PJP is a major cause of G-test elevation.  Mycobacterial: The positive T-cell test for tuberculosis infection is a significant finding. While the BAL fluid was negative for M. tuberculosis on smear and culture, this may represent reactivation of latent TB, a diagnosis of exclusion that requires a high index of suspicion, and can be difficult to confirm, especially in paucibacillary disease. Given this complex picture, a multi-pronged therapeutic approach is necessary to address each identified pathogen. Recommended Antibiotic Treatment Plan This patient requires a broad-spectrum regimen to cover the identified pathogens. The treatment should be tailored based on the patient's history, severity of illness, and the specific organisms identified. 1. For Pseudomonas aeruginosa  Drug Choice: The patient should receive an anti-pseudomonal beta-lactam. Given his prior use of etapenem and his COPD status, there is a high likelihood of resistance. Therefore, a more potent anti-pseudomonal agent should be chosen. A reasonable choice would be cefepime or piperacillin-tazobactam.  Dosage: Cefepime 2g IV q8h or Piperacillin-tazobactam 4.5g IV q6h. Dosing should be adjusted based on renal function. Extended infusion times may be considered for optimizing pharmacodynamics.  Length of Use: The duration of treatment for a severe exacerbation or superimposed pneumonia with P. aeruginosa in a COPD patient is typically 10 to 14 days. Clinical response and resolution of inflammatory markers (WBC, CRP) should guide the total duration. 2. For Aspergillus fumigatus  Drug Choice: Voriconazole is the first-line agent for the treatment of invasive aspergillosis. It has superior efficacy compared to amphotericin B for primary therapy.  Dosage: An initial loading dose is crucial to rapidly achieve therapeutic levels. The standard regimen is Voriconazole 6 mg/kg IV q12h for two doses, followed by a maintenance dose of 4 mg/kg IV q12h. Dosing may need to be adjusted based on therapeutic drug monitoring (TDM) to maintain serum trough levels between 1-5.5 ug/mL.  Length of Use: Treatment for invasive aspergillosis is typically prolonged, with a minimum duration of 6 to 12 weeks. The final duration is guided by clinical and radiological response, and the degree of underlying immunosuppression. 3. For Pneumocystis jirovecii  Drug Choice: The agent of choice for PJP is trimethoprim-sulfamethoxazole (TMP-SMX).  Dosage: The standard treatment dose is based on the trimethoprim component: 15-20 mg/kg/day in 3-4 divided doses. Given the patient's likely weight, this would be approximately 20 mg/kg/day, which translates to a dose of TMP 320mg/SMX 1600mg IV/oral q8h.  Length of Use: A full treatment course for PJP is 21 days. 4. For Tuberculosis  Drug Choice: Given the positive T-cell test and the complex clinical picture, initiating empiric treatment for active TB is a reasonable consideration while awaiting definitive cultures. A standard four-drug regimen would be initiated, typically including Isoniazid, Rifampin, Pyrazinamide, and Ethambutol.  Dosage: Standard dosing should be used, adjusted for weight and renal function.  Length of Use: If cultures become positive, a full course of therapy will be required, typically at least 6 months. If cultures remain negative and the patient responds to other therapies, the TB regimen may be de-escalated or discontinued in consultation with a TB expert. Note:  The patient is severely ill with multiple co-infections. Therefore, all these regimens should be initiated simultaneously.  Drug-Drug Interactions: Careful attention must be paid to potential drug-drug interactions, particularly with voriconazole, which is a potent inhibitor of CYP3A4, and rifampin, which is a potent inducer. Using both concurrently is generally avoided due to the profound effect of rifampin on voriconazole metabolism, leading to subtherapeutic levels. In this scenario, rifabutin may be considered as an alternative to rifampin in the TB regimen, or consultation with a specialist for a modified regimen is highly recommended.  Adjunctive Therapy: The use of corticosteroids for PJP is indicated in patients with moderate to severe disease, but the patient is already on them. The steroid dose may need to be adjusted based on clinical status. Close monitoring for adverse effects is essential. |

## Supplementary Table 2. Clinical characteristics and LLM responses of Case 2

| Medical history summary | A male in his mid 70s was admitted to the hospital due to a "fever of 10 days". The patient had a fever of up to 39.9 ℃ without any obvious cause 10 days ago, accompanied by coughing and sputum, coughing up a lot of yellow sticky phlegm, and shortness of breath. The blood test showed procalcitonin at 6.16ng/mL, white blood cell count at 9.1 × 10 ^ 9/L, absolute neutrophil count at 7.96 × 10 ^ 9/L, whole blood CRP at 167.9mg/L, and blood culture showed Staphylococcus aureus. Treatment with vancomycin and linezolid was given. But the fever was recurrent with a maximum temperature of 39.9 ℃. The patient underwent transcatheter aortic valve implantation surgery 7 months ago, and after the surgery, the patient's chest tightness and shortness of breath improved significantly. | |
| --- | --- | --- |
| Laboratory and imaging findings | Blood culture indicates Staphylococcus aureus (cefoxitin screening test negative): Penicillin R, Penicillin S, Gentamicin S, Moxifloxacin S, Rifampicin S, Clindamycin S, Vancomycin S, Linezolid S, Tigecycline S, Tetracycline S; Three dimensional echocardiography of the heart: 1 After aortic valve TAVI surgery: infective endocarditis caused by artificial valve is the first consideration, with a small amount of regurgitation around and in the center of the valve Rheumatic valve disease: Mild mitral stenosis with mild regurgitation Minor tricuspid regurgitation 4. Moderate pericardial effusion | |
| Answers | Preliminary Diagnosis and Investigations Strategy | Treatment Strategy |
| DeepSeek-R1 | "Diagnoses in Order of Likelihood:  1. Prosthetic Valve Endocarditis (PVE) due to Staphylococcus aureus  The patient’s TAVI history, persistent bacteremia despite glycopeptide/oxazolidinone therapy, and elevated procalcitonin/CRP strongly suggest PVE. S. aureus is a leading cause of early PVE, often associated with biofilm formation on prosthetic material, leading to treatment failure without source control. Persistent fever reflects inadequate penetration of antibiotics into vegetations or possible resistance.  2. Metastatic Septic Emboli with Pulmonary Involvement  S. aureus bacteremia can seed septic emboli, particularly in the context of endocarditis. Cough, purulent sputum, and dyspnea may indicate septic pulmonary emboli or secondary pneumonia. Chest imaging may reveal nodular/cavitary lesions, which are not adequately addressed by systemic therapy alone.  3. Paravalvular Abscess or Deep Tissue Infection  TAVI-related paravalvular complications (e.g., abscess, pseudoaneurysm) can arise from hematogenous seeding. These infections often require advanced imaging for detection and surgical intervention for resolution, explaining persistent bacteremia despite appropriate antimicrobials.  Next Steps in Examination:  - Transesophageal Echocardiogram (TEE): Mandatory to evaluate prosthetic valve integrity, detect vegetations, abscesses, or paravalvular complications. TEE’s superior resolution is critical compared to TTE in prosthetic valves.  - Chest CT with Contrast: Assess for pulmonary abscesses, empyema, or septic emboli. Contrast enhances detection of vascular/cavitary lesions.  - Repeat Blood Cultures & Antimicrobial Susceptibility Testing (AST): Confirm clearance/resistance of S. aureus (e.g., vancomycin MIC ≥2 µg/mL suggesting reduced susceptibility).  - 18F-FDG PET/CT or Cardiac CTA: If TEE is equivocal, these modalities can identify occult infection foci (e.g., prosthetic valve uptake, metastatic sites).  - Inflammatory Marker Trends: Serial CRP/procalcitonin to gauge response. Stagnant levels suggest ongoing infection.  - Vancomycin Trough Monitoring: Ensure therapeutic levels (15–20 µg/mL for MRSA bacteremia/endocarditis).  Rationale for Prioritization:  PVE is the leading diagnosis due to the temporal link to TAVI, S. aureus bacteremia, and refractory fever. Septic emboli and paravalvular abscesses are direct complications of untreated/partially treated endocarditis, warranting urgent imaging and microbiologic correlation." | "Optimal Antibiotic Regimen for Prosthetic Valve Endocarditis (PVE) due to Methicillin-Susceptible Staphylococcus aureus (MSSA):  1. First-Line Therapy  Drug Choice:  - Nafcillin or Oxacillin (β-lactamase-stable penicillins)  Rationale: Superior bactericidal activity against MSSA compared to vancomycin. Critical for penetrating vegetations and biofilms on prosthetic material.  Dosage:  - Nafcillin: 2 g IV every 4 hours (12 g/day).  - Oxacillin: 2 g IV every 4 hours (12 g/day).  Alternative: Cefazolin (if penicillin allergy without anaphylaxis): 2 g IV every 8 hours.  Adjunctive Synergistic Agents:  - Gentamicin (aminoglycoside):  Rationale: Enhances early bactericidal activity via synergy. Use limited to the first 2 weeks to minimize nephrotoxicity.  Dosage: 3 mg/kg IV once daily (adjusted for renal function; target peak <3 µg/mL, trough <1 µg/mL).  - Rifampin (biofilm-penetrant agent):  Rationale: Essential for PVE due to its ability to penetrate biofilms on prosthetic material. Add after blood culture clearance to avoid resistance.  Dosage: 300 mg PO/IV every 8 hours (900 mg/day total).  Duration:  - Total duration: 6 weeks of β-lactam + rifampin.  - Gentamicin: Discontinue after 2 weeks.  2. Monitoring & Adjustments  - Therapeutic Drug Monitoring (TDM):  - Gentamicin: Monitor renal function (SCr, eGFR) and trough levels.  - Vancomycin (if used as salvage): Target trough 15–20 µg/mL (if β-lactams contraindicated).  - Inflammatory Markers: Serial CRP/procalcitonin to track response.  - Echocardiographic Surveillance: Repeat TEE at 2–4 weeks to assess vegetation size, valvular function, and pericardial effusion progression.  3. Special Considerations  1. Pericardial Effusion:  - Moderate effusion raises concern for pericarditis or abscess. Consider pericardiocentesis if hemodynamic compromise or suspected purulent infection.  2. Persistent Bacteremia/Fever:  - Evaluate for paravalvular abscess (CTA/PET-CT) or metastatic foci (e.g., septic emboli). Surgical valve replacement may be required if medical therapy fails.  3. Rifampin Interactions:  - Adjust concomitant medications (e.g., warfarin, statins) due to CYP450 induction.  4. Salvage Therapy (If β-Lactam Contraindicated)  - Vancomycin (inferior to β-lactams for MSSA):  Dosage: 15–20 mg/kg IV every 8–12 hours (trough 15–20 µg/mL).  - Daptomycin (if vancomycin intolerance): 8–10 mg/kg IV once daily.  Evidence Basis:  - IDSA 2015 Endocarditis Guidelines: β-lactams + rifampin + gentamicin is standard for MSSA PVE.  - NEJM 2020: Rifampin reduces relapse in prosthetic infections but requires combination therapy to prevent resistance.  Duration of Therapy:  - 6 weeks total for PVE, as shorter courses correlate with relapse.  Next Steps:  - Surgical consultation for pericardial effusion/valve dysfunction.  - Repeat blood cultures at 48–72 hours to confirm clearance.  This regimen prioritizes biofilm penetration, synergy, and guideline-directed duration to optimize cure rates in PVE." |
| ChatGPT-5 | Given the patient’s age, recent prosthetic valve implantation, high-grade persistent fever, respiratory symptoms, significantly elevated inflammatory markers, and a positive blood culture for Staphylococcus aureus, the clinical picture strongly suggests a serious systemic infection with possible endovascular involvement. Below are the top three differential diagnoses in order of likelihood:  1. Prosthetic Valve Endocarditis (PVE) due to Staphylococcus aureus Rationale:  The presence of S. aureus bacteremia in a patient with a prosthetic heart valve is highly concerning for PVE. S. aureus is a highly virulent pathogen with a strong predilection for prosthetic material. The persistence of fever despite appropriate anti-MRSA therapy increases the likelihood of endovascular infection, especially in the context of a TAVI procedure within the past year, which is a known risk factor for PVE.  2. Hospital-Acquired Pneumonia (HAP) or Ventilator-Associated Pneumonia (if intubated) Rationale:  The patient has respiratory symptoms (productive cough with yellow purulent sputum, dyspnea) and markedly elevated inflammatory markers, suggesting a severe lower respiratory tract infection. S. aureus, including MRSA, is a recognized cause of nosocomial pneumonia, particularly in elderly or immunocompromised patients. However, this diagnosis does not fully account for the recurrent fever under adequate antimicrobial therapy or the bacteremia unless secondary hematogenous seeding has occurred.  3. Vertebral Osteomyelitis/Discitis with Bacteremia Rationale:  In elderly patients with persistent S. aureus bacteremia and no clear source, metastatic infection such as vertebral osteomyelitis should be considered. These infections may initially present with subtle or nonspecific symptoms and may coexist with endocarditis. Given the bacteremia's persistence, this is a plausible site of hematogenous seeding.   Next Diagnostic Steps: 1. Transesophageal Echocardiography (TEE)   - Gold standard for evaluating prosthetic valve endocarditis. Transthoracic echo has poor sensitivity in prosthetic valves. 2. Repeat Blood Cultures (at least 2 sets)   - To evaluate for persistent bacteremia and guide microbiological reassessment. 3. Chest CT Scan   - To assess for pneumonia complications such as abscess, empyema, or cavitation. 4. Spinal MRI with contrast   - To assess for vertebral osteomyelitis or epidural abscess, particularly if there is any back pain or neurologic symptoms. 5. Whole-body PET/CT (if available and feasible)   - Useful for detecting occult metastatic foci of infection, especially in prosthetic valve endocarditis with unclear source or persistent fever. Let me know if you’d like help formulating diagnostic criteria (e.g., modified Duke) or interpreting echo/PET-CT findings when available. | "Thank you for the additional data. Based on the clinical and microbiological profile, we are dealing with prosthetic valve endocarditis (PVE) caused by methicillin-susceptible Staphylococcus aureus (MSSA) following TAVI. The cefoxitin screening test is negative, indicating methicillin susceptibility, although penicillin resistance is noted. This alters the antimicrobial approach significantly.  Diagnosis  Prosthetic Valve Endocarditis due to MSSA  Confirmed by:  - Positive blood cultures for MSSA  - Evidence of prosthetic valve involvement on TEE (vegetation/small regurgitation)  - Systemic inflammatory response with recurrent fever  - Recent TAVI (7 months ago) — high-risk context  Recommended Antimicrobial Therapy  First-line Regimen for MSSA PVE:  Based on IDSA/AHA guidelines (2015) and ESC guidelines (2023)  1. Nafcillin or Oxacillin  - Dosage: 2 g IV every 4 hours (or 12 g/day continuous infusion)  - Duration: Minimum of 6 weeks from the first negative blood culture  2. Rifampicin (adjunctive, after 3–5 days of bacteremia clearance)  - Dosage: 300 mg IV or orally every 8 hours (or 600 mg BID)  - Start: ONLY after bloodstream clearance is documented (≥ 3 days of negative cultures)  - Rationale: Biofilm penetration on prosthetic material  3. Gentamicin (optional; controversial in modern practice)  - Dosage: 1 mg/kg IV every 8 hours  - Duration: 3–5 days only (if used at all)  - Note: Once standard, now often omitted due to nephrotoxicity and limited survival benefit  Avoid:  - Linezolid, tigecycline, or moxifloxacin as first-line for MSSA PVE — inferior efficacy compared to beta-lactams.  - Vancomycin is less effective than oxacillin/nafcillin for MSSA, and reserved for beta-lactam intolerance.  Summary Regimen:  Nafcillin 2 g IV q4h ≥ 6 weeks  Rifampicin 300 mg IV/PO q8h (or 600 BID) ≥ 6 weeks  Gentamicin † 1 mg/kg IV q8h 3–5 days (if used)  Additional Management Notes:  - Monitor renal and hepatic function weekly.  - Perform repeat blood cultures every 48–72 h until negative.  - Re-evaluate pericardial effusion; moderate effusions may reflect periannular extension or associated pericarditis — consider serial echocardiography or cardiac MRI.  - Consider surgical consultation if any of the following arise: heart failure, uncontrolled infection, annular abscess, large vegetation, or persistent bacteremia >7 days.  Let me know if the patient has a beta-lactam allergy or renal dysfunction, and I can tailor the regimen accordingly." |
| Grok 3 | "Below are the three most likely infectious disease diagnoses for this male patient in his mid 70s, arranged in order of possibility, based on the clinical presentation and available data. Each diagnosis is supported by a concise rationale grounded in current scientific evidence, followed by the recommended next step in examination.  1. Infective Endocarditis Due to Staphylococcus aureus  Reasons: The patient has a prosthetic aortic valve from a transcatheter aortic valve implantation (TAVI) performed 7 months ago, placing him within the high-risk window for prosthetic valve endocarditis (PVE), particularly with Staphylococcus aureus, a leading cause of PVE within the first year post-implantation. The persistent fever (up to 39.9°C) despite treatment with vancomycin and linezolid, combined with a positive blood culture for S. aureus and new-onset shortness of breath, strongly suggests endocarditis, potentially complicated by heart failure or embolic phenomena. Elevated procalcitonin (6.16 ng/mL) and C-reactive protein (CRP, 167.9 mg/L) further support a severe bacterial infection, aligning with the modified Duke criteria (one major criterion: positive blood culture for a typical organism).  Next Plan in Examination: Perform a transesophageal echocardiogram (TEE) to visualize the prosthetic valve for vegetations, assess valve function, and detect paravalvular complications, as TEE offers superior sensitivity over transthoracic echocardiography in prosthetic valve cases.  2. Staphylococcus aureus Pneumonia  Reasons: The patient’s cough with copious yellow, sticky phlegm and shortness of breath, alongside elevated inflammatory markers (procalcitonin, CRP, and neutrophilia at 7.96 × 10^9/L), indicate a lower respiratory tract infection, with S. aureus bacteremia potentially originating from or complicating pneumonia. S. aureus is a recognized cause of severe community-acquired or healthcare-associated pneumonia, particularly in older adults, and the persistent fever suggests an ongoing infectious process possibly inadequately controlled by current antibiotics.  Next Plan in Examination: Obtain a chest X-ray or computed tomography (CT) scan to evaluate for pulmonary infiltrates, consolidation, or necrotizing features typical of S. aureus pneumonia, and consider sputum culture to confirm the presence of S. aureus in the respiratory tract.  3. Staphylococcus aureus Bacteremia with Possible Metastatic Infection  Reasons: The positive blood culture for S. aureus and persistent fever despite appropriate antibiotics (vancomycin and linezolid) raise concern for an occult focus of infection beyond the heart or lungs, such as osteomyelitis, septic arthritis, or a device-related complication, given S. aureus’s propensity for hematogenous spread. Although no additional localizing symptoms are reported, the prosthetic valve and recent TAVI history heighten the risk of metastatic seeding, warranting further investigation.  Next Plan in Examination: Conduct a thorough physical examination to identify signs of metastatic infection (e.g., joint tenderness, back pain, or skin lesions), and consider targeted imaging (e.g., bone scan, MRI, or ultrasound) if localizing signs emerge or if the fever persists without a clear source.  Summary of Diagnostic Prioritization  Infective endocarditis ranks highest due to the prosthetic valve, S. aureus bacteremia, and persistent fever, which are hallmarks of PVE within the first year post-TAVI. S. aureus pneumonia is a strong alternative or coexisting condition, given the prominent respiratory symptoms and inflammatory markers. Bacteremia with possible metastatic infection is less likely as a primary diagnosis but remains a critical consideration due to the potential for disseminated disease in this clinical context. These recommendations align with current guidelines, such as those from the American Heart Association and the European Society of Cardiology for endocarditis, and emphasize diagnostic precision to guide subsequent management." | "To determine the best antibiotic treatment for this patient, we need to consider the clinical scenario and the microbiological data provided. The patient has infective endocarditis (IE) caused by Staphylococcus aureus on a prosthetic valve following a transcatheter aortic valve implantation (TAVI) procedure. The blood culture indicates that the S. aureus is cefoxitin screening test negative, meaning it is methicillin-sensitive Staphylococcus aureus (MSSA). The sensitivity report lists: Penicillin R, Penicillin S, Gentamicin S, Moxifloxacin S, Rifampicin S, Clindamycin S, Vancomycin S, Linezolid S, Tigecycline S, and Tetracycline S. Additionally, echocardiography confirms vegetation on the artificial valve, with moderate pericardial effusion and other valvular abnormalities that are not the primary focus of the infection. Let’s break this down step-by-step to determine the optimal treatment, including drug choice, dosage, and duration.  Step 1: Understanding the Pathogen and Sensitivity  - Organism: Staphylococcus aureus, cefoxitin screening test negative, confirming MSSA.  - Sensitivity Report: The notation "Penicillin R, Penicillin S" is ambiguous and likely contains a typographical error. Typically, S. aureus produces beta-lactamase, rendering penicillin ineffective, even if lab sensitivity is reported. Given that it’s MSSA (cefoxitin negative), it’s resistant to penicillin (Penicillin R) in clinical practice, and "Penicillin S" is likely a mistake. The organism is sensitive to gentamicin, rifampicin (rifampin), vancomycin, and others, which aligns with MSSA’s typical profile.  - Key Insight: For MSSA, beta-lactam antibiotics (e.g., anti-staphylococcal penicillins like nafcillin or oxacillin) are preferred over alternatives like vancomycin due to superior efficacy, unless contraindicated.  Step 2: Clinical Context  - Diagnosis: Prosthetic valve endocarditis (PVE) due to MSSA, a severe infection requiring aggressive treatment.  - Prosthetic Valve: Infections involving prosthetic material (e.g., TAVI valve) are harder to eradicate due to biofilm formation, necessitating combination therapy.  - Patient Factors: The patient is in his mid 70s, which raises concerns about renal function when using nephrotoxic drugs like gentamicin. No beta-lactam allergy is mentioned, so we assume tolerance to these agents.  Step 3: Guideline-Based Treatment  The American Heart Association (AHA) guidelines provide evidence-based recommendations for PVE caused by MSSA. The standard regimen includes a combination of antibiotics to target the organism effectively and address the prosthetic material:  - Primary Antibiotic: A beta-lactam antibiotic is the cornerstone of therapy for MSSA.  - Nafcillin or Oxacillin: 2 g intravenously (IV) every 4 hours.  - Alternative: Cefazolin 2 g IV every 8 hours (if nafcillin/oxacillin are unavailable or poorly tolerated, though less preferred due to potential inoculum effect in severe infections).  - Regional Variation: In some countries (e.g., Europe), flucloxacillin 2 g IV every 4–6 hours is used instead of nafcillin/oxacillin.  - Adjunctive Therapy:  - Rifampin: 300 mg orally every 8 hours. Rifampin is critical for its activity against bacteria within biofilms on prosthetic material.  - Gentamicin: 1 mg/kg IV every 8 hours (dose adjusted based on ideal body weight and renal function). Gentamicin provides synergistic killing but is limited to the first 2 weeks to minimize toxicity.  - Duration:  - Nafcillin/oxacillin/flucloxacillin and rifampin: 6 weeks.  - Gentamicin: 2 weeks.  Step 4: Tailoring the Regimen  - Drug Choice: Since the organism is MSSA and sensitive to gentamicin and rifampin, the guideline regimen is appropriate. Nafcillin is chosen as the primary beta-lactam (commonly used in the U.S.), but oxacillin or flucloxacillin are equivalent alternatives depending on availability. Vancomycin and linezolid, while effective, are not first-line for MSSA due to inferior outcomes compared to beta-lactams.  - Dosage: Standard doses are used as outlined above, with gentamicin dosing requiring adjustment based on the patient’s weight and renal function (e.g., creatinine clearance).  - Duration: At least 6 weeks is required for PVE, reflecting the severity and prosthetic involvement. Gentamicin is stopped after 2 weeks to reduce toxicity risk.  - Monitoring: Given the patient’s age (mid 70s), gentamicin use necessitates close monitoring of renal function (e.g., serum creatinine) and gentamicin levels (target trough <1 mcg/mL) to prevent nephrotoxicity and ototoxicity.  Step 5: Addressing Alternatives and Complications  - Prior Treatment: The patient was on vancomycin and linezolid with persistent fever, suggesting inadequate response. Switching to a beta-lactam-based regimen aligns with MSSA’s susceptibility and guideline recommendations.  - Other Antibiotics: Moxifloxacin, clindamycin, and tetracycline are not standard for IE due to lack of bactericidal activity or guideline support in this context.  - Pericardial Effusion: Moderate effusion is noted, likely a complication of endocarditis. It doesn’t alter the antibiotic regimen but requires monitoring; if hemodynamically significant, drainage may be needed.  - Allergy Consideration: If a beta-lactam allergy were present, vancomycin 15 mg/kg IV every 12 hours (adjusted for renal function) could replace nafcillin, but no allergy is specified.  Final Antibiotic Treatment Plan  Based on the above analysis, the best antibiotic treatment for this patient with MSSA prosthetic valve endocarditis is:  - Nafcillin: 2 g IV every 4 hours for 6 weeks.  - Alternatives: Oxacillin 2 g IV every 4 hours or flucloxacillin 2 g IV every 4–6 hours, depending on regional availability.  - Rifampin: 300 mg orally every 8 hours for 6 weeks.  - Gentamicin: 1 mg/kg IV every 8 hours for the first 2 weeks, with renal function and gentamicin levels monitored closely.  This regimen targets MSSA effectively, addresses the prosthetic valve involvement with rifampin, and uses gentamicin synergistically for the initial phase. The 6-week duration ensures adequate treatment of this deep-seated infection. Close follow-up, including repeat blood cultures and echocardiography, is essential to confirm resolution, and surgical consultation may be warranted if the infection persists or complications (e.g., worsening effusion) arise." |
| Gemini 2.5 Flash | Based on the clinical history, laboratory findings, and the patient's recent surgical intervention, the most likely diagnosis is a severe, deep-seated infection originating from the prosthetic valve. The persistence of high-grade fever and bacteremia despite appropriate targeted antimicrobial therapy is a critical diagnostic clue. Differential Diagnosis 1. Prosthetic Valve Infective Endocarditis (PVE): This is the most probable diagnosis. The patient’s recent history of transcatheter aortic valve implantation (TAVI) is a major risk factor, and the onset of fever 7 months post-procedure is consistent with subacute PVE. The persistent Staphylococcus aureus bacteremia, a pathogen known for its virulence and capacity to form biofilms on foreign materials, strongly points to a persistent intracardiac source that is not being cleared by systemic antibiotics alone. 2. Metastatic Septic Embolism / Occult Abscess: This is a highly probable complication of S. aureus bacteremia. S. aureus has a strong propensity for hematogenous dissemination, leading to secondary foci of infection. The patient's persistent fever may be due to an undrained abscess, such as a psoas muscle abscess, vertebral osteomyelitis, or septic pulmonary emboli, which can be challenging to locate with standard imaging. 3. Healthcare-Associated Pneumonia (HAP) with Uncontrolled Bacteremia: While the patient presents with symptoms of lower respiratory tract infection (cough and sputum), it is less likely to be the sole cause of the persistent high-grade bacteremia and fever, especially given the initial antimicrobial coverage. However, S. aureus can cause a severe, cavitating pneumonia. The unresolved bacteremia suggests either inadequate source control at a primary site (e.g., a persistent endovascular infection) or metastatic seeding to the lungs. Proposed Next Steps in Examination 1. Cardiovascular Imaging:  Transesophageal Echocardiography (TEE): This is the gold standard for diagnosing infective endocarditis, particularly on prosthetic valves. It is far superior to transthoracic echocardiography (TTE) for visualizing vegetations, abscesses, or perivalvular leaks. A TEE should be performed urgently to evaluate the TAVI valve for vegetations and other complications. 2. Advanced Imaging for Source Identification:  Fluorodeoxyglucose Positron Emission Tomography/Computed Tomography (FDG-PET/CT): This imaging modality is highly sensitive for identifying active inflammatory processes and is a powerful tool for locating the source of bacteremia in cases of fever of unknown origin. It can detect occult abscesses, osteomyelitis, or septic emboli throughout the body, providing crucial information for source control.  Dedicated Thoracic CT: A high-resolution CT of the chest would be beneficial to better characterize the pulmonary infiltrates and rule out septic emboli or cavitating pneumonia. 3. Microbiological and Serological Investigations:  Review Blood Culture Sensitivity: A thorough review of the S. aureus isolate's antimicrobial susceptibility profile is essential to confirm its sensitivity to vancomycin and linezolid.  Repeat Blood Cultures: Continue to obtain serial blood cultures to monitor for clearance of bacteremia, which is a key indicator of therapeutic efficacy.  Rule Out Other Sources: A comprehensive physical examination should be conducted to search for other potential sources of infection, such as skin and soft tissue infections, prosthetic joint infections, or central venous catheter infections. Any indwelling central lines should be removed and the tip cultured. | "Based on the updated echocardiographic findings and the confirmed susceptibility of the Staphylococcus aureus isolate, the diagnosis of a definitive prosthetic valve infective endocarditis (PVE) is established. The presence of moderate pericardial effusion indicates a severe complication, likely representing a paravalvular abscess or rupture. The susceptibility profile reveals the organism is Methicillin-Susceptible Staphylococcus aureus (MSSA), allowing for a switch to more effective and potentially less toxic beta-lactam therapy.  Recommended Antibiotic Treatment Plan  The standard of care for MSSA PVE is a multi-agent regimen designed to achieve rapid bactericidal activity and penetrate the biofilm that has formed on the prosthetic valve. This is a critical situation, and the duration of therapy is prolonged.  1. Primary Agent (for MSSA): The vancomycin should be discontinued immediately. The superior efficacy of beta-lactams for MSSA infections is well-established. While anti-staphylococcal penicillins (e.g., nafcillin or oxacillin) are traditionally considered first-line, cefazolin is an equally effective and often preferred alternative due to its more favorable safety profile (lower risk of hepatotoxicity and interstitial nephritis) and convenient dosing schedule.  Drug Choice: Cefazolin  Dosage: 2 g IV every 8 hours. In severe cases, some experts recommend dosing at 2 g IV every 6 hours. The dosage should be adjusted for renal function.  Length of Use: The minimum duration is 6 weeks. The total duration is counted from the first day of a negative blood culture and should be guided by clinical and imaging response.  2. Adjunctive Agent (for Biofilm Penetration):  Drug Choice: Rifampin is recommended for prosthetic valve endocarditis due to its unique ability to penetrate the biofilm and target bacteria sequestered on the prosthetic material. Crucially, rifampin must never be used as monotherapy as resistance develops rapidly.  Dosage: 300 mg orally or IV twice daily (600 mg daily).  Length of Use: The rifampin should be continued for the entire 6-week duration of therapy. It is recommended to start the primary beta-lactam agent and confirm clinical improvement (e.g., defervescence) before initiating rifampin to avoid potential for resistance and to ensure the primary agent is effective.  3. Synergistic Agent (Optional):  Drug Choice: Gentamicin has historically been used for synergy in the initial phase of staphylococcal PVE. However, recent evidence and updated guidelines have raised concerns about its toxicity (nephro- and ototoxicity) without a clear, confirmed benefit in mortality or cure rates.  Recommendation: Given the patient's age and the potential for renal impairment, the use of gentamicin is highly debated and should be carefully weighed against the risks. A regimen of Cefazolin + Rifampin is robust. If gentamicin is used, it should be for a limited duration. A cautious approach would be to omit gentamicin unless there is a specific, compelling clinical reason to include it, such as ongoing high-grade bacteremia despite Cefazolin + Rifampin.  Summary of Best Treatment Regimen:  Cefazolin 2 g IV every 8 hours for at least 6 weeks.  Rifampin 300 mg orally or IV twice daily for at least 6 weeks.  Important Considerations for Management:  Surgical Intervention: The presence of a moderate pericardial effusion and likely paravalvular abscess formation are strong indications for surgical intervention, specifically valve replacement, as defined by international guidelines. Medical therapy alone is often insufficient for cure in these complicated cases. The cardiac surgery team should be consulted urgently for a comprehensive evaluation and to plan for potential valve re-replacement.  Monitoring: The patient's blood cultures must be monitored daily until they are definitively sterile. Inflammatory markers (WBC, CRP, PCT) should be tracked to assess treatment response. Therapeutic drug monitoring (TDM) for rifampin is not standard, but TDM for gentamicin is essential if it is used.  Adverse Effects: Close monitoring for signs of drug-induced nephrotoxicity (creatinine, BUN) from cefazolin or gentamicin, and hepatotoxicity (AST, ALT, bilirubin) from rifampin is critical throughout the prolonged treatment course." |

† Optional and used cautiously

## Supplementary Table 3. Clinical characteristics and LLM responses of Case 3

| Medical history summary | A male in his early 70s was admitted to the hospital due to "fever for 5 days". The patient had a fever for 5 days, accompanied by chills, nausea and vomiting, frequent urination with urgency and pain, no cough and chest tightness. He came to our emergency department and blood test showed white blood cell count of 11.2 × 10 ^ 9/L, neutrophil percentage of 78.6%, interleukin-6 (IL-6) of 20.10 pg/mL, procalcitonin of 27.62 ng/mL. Urine routine showed urine leukocyte count of 208/μ L | |
| --- | --- | --- |
| Laboratory and imaging findings | Abdominal CT scan showed slight exudation around both kidneys; Urine culture: Escherichia coli (ESBLs -) <10000 cfu/ml, piperacillin tazobactam R, ceftazidime R, cefuroxime R, etapenem S, levofloxacin R, tigecycline S, cefoperazone sulbactam S, ceftriaxone R, cefoxitin R, imipenem S, amikacin S, compound sulfamethoxazole R | |
| Answers | Preliminary Diagnosis and Investigations Strategy | Treatment Strategy |
| DeepSeek-R1 | Diagnostic Considerations (Order of Likelihood): 1. Acute Pyelonephritis with Bacteremia/Urosepsis   The constellation of fever, urinary urgency/dysuria, elevated urine leukocytes (208/μL), and markedly elevated procalcitonin (27.62 ng/mL) strongly supports a severe upper urinary tract infection. Procalcitonin >10 ng/mL is highly specific for systemic bacterial infections, particularly Gram-negative sepsis, and correlates with urosepsis in this context. Neutrophilia and IL-6 elevation further indicate a robust systemic inflammatory response.  2. Gram-Negative Bacterial Sepsis (e.g., Escherichia coli, Klebsiella)  Procalcitonin levels >10 ng/mL are disproportionately associated with Gram-negative bacteremia, which commonly originates from a urinary source in elderly males. The absence of pulmonary symptoms and focal urinary signs make alternative sources (e.g., pneumonia, intra-abdominal) less likely. Neutrophil-predominant leukocytosis aligns with Enterobacterales-driven sepsis.  3. Healthcare-Associated Complicated UTI (e.g., Emphysematous Pyelonephritis, Obstructive Nephrolithiasis)   Elderly patients with comorbidities are at risk for atypical or severe UTIs. Urinary obstruction (e.g., from prostatic hypertrophy or stones) may explain refractory symptoms. Imaging is critical to exclude gas-forming infections or anatomical complications that require drainage.    Next Steps in Examination/Diagnostic Workup:  - Microbiological Confirmation:   - Urine culture and sensitivity to identify causative pathogens (e.g., E. coli, Pseudomonas).   - Blood cultures (aerobic/anaerobic) to confirm bacteremia and guide antimicrobial therapy.  - Imaging:   - Renal ultrasound or CT abdomen/pelvis with contrast to assess for pyelonephritis, abscess, hydronephrosis, or emphysematous changes.   - Post-void residual measurement to evaluate for urinary retention secondary to prostatic obstruction.  - Additional Labs:   - Serum lactate to assess for septic shock.   - Renal function tests (creatinine, BUN) to evaluate for acute kidney injury.   - Repeat inflammatory markers (procalcitonin trend) to monitor response to intervention.  This structured approach prioritizes identifying the source of sepsis and ruling out complications requiring urgent intervention. | " Antibiotic Treatment Recommendations  Based on the ESBL-negative Escherichia coli isolate with susceptibility data and clinical severity (sepsis, pyelonephritis with perinephric exudate), the optimal regimen prioritizes broad-spectrum coverage with renal penetration and accounts for resistance patterns:  1. First-Line Therapy: Carbapenem  - Drug: Ertapenem (preferred due to susceptibility and narrower spectrum)  - Dose: 1 g IV daily (adjust for renal impairment if eGFR <30 mL/min: 500 mg daily).  - Rationale:  - Ertapenem covers AmpC-producing Enterobacterales and avoids overuse of broader carbapenems (e.g., imipenem).  - Susceptibility to ertapenem (MIC ≤0.5 µg/mL) confirms efficacy. Avoid if Pseudomonas is suspected (not active).  - Alternative: Imipenem-cilastatin (if concern for polymicrobial infection or critical illness)  - Dose: 500 mg IV every 6 hours (renal dose adjustment required).  2. Alternative Options (if carbapenem intolerance/allergy):  - Cefoperazone-sulbactam (3:1 ratio):  - Dose: 2 g IV every 12 hours (prolonged infusion, e.g., over 3 hours, for enhanced pharmacodynamics).  - Rationale: Retains activity against AmpC producers and some ESBLs; susceptibility in vitro supports use.  - Amikacin (add for synergy in refractory cases or immunocompromised hosts):  - Dose: 15–20 mg/kg IV once daily (monitor trough levels; target <5 µg/mL to minimize nephrotoxicity).  3. Avoid:  - Tigecycline: Poor urinary penetration; reserved for intra-abdominal/skin infections.  - Fluoroquinolones (levofloxacin): High resistance rates in E. coli (levofloxacin-R here).  - Piperacillin-tazobactam: Documented resistance (MIC >16 µg/mL).  Duration of Therapy:  - Uncomplicated pyelonephritis: 7–10 days.  - Sepsis or perinephric inflammation (CT findings): Extend to 10–14 days.  - Persistent fever/clinical instability: Re-image to exclude abscess and reassess for source control.  Key Considerations:  1. Urinary Source Control: Exclude obstruction (e.g., prostatic hypertrophy, stones) via post-void residual or urology consult.  2. Stewardship: De-escalate to ertapenem once blood/urine cultures confirm susceptibility.  3. Renal Monitoring: Adjust doses for dynamic renal function and avoid nephrotoxic agents (e.g., amikacin) unless critical.  This regimen aligns with IDSA/ESCMID guidelines for multidrug-resistant UTIs and sepsis, balancing efficacy, toxicity, and resistance prevention. Confirm with local antibiograms." |
| ChatGPT-5 | "Based on the clinical presentation and initial laboratory findings, the top three differential diagnoses in this elderly male presenting with systemic inflammatory response and urinary symptoms are as follows:  1. Acute Bacterial Pyelonephritis (ABP)  Likelihood: Most likely diagnosis  - The patient presents with fever, chills, dysuria, urinary urgency, and suprapubic discomfort — classic features of upper urinary tract infection.  - Laboratory data show marked leukocytosis, neutrophilia, markedly elevated procalcitonin (27.62 ng/mL, which strongly suggests bacterial sepsis), and pyuria (urine leukocytes 208/μL), all of which are consistent with a severe urinary source infection.  - IL-6 elevation further supports the presence of systemic inflammation, commonly seen in severe pyelonephritis or urosepsis.  2. Urosepsis (likely secondary to complicated UTI)  Likelihood: Second most likely  - Urosepsis represents a continuum from severe urinary tract infection to systemic sepsis, especially relevant in elderly or immunocompromised individuals.  - Given the patient's advanced age and significant inflammatory markers (very high procalcitonin and elevated IL-6), the possibility of systemic dissemination from a urogenital source (likely prostate or upper tract) is high.  - The absence of respiratory symptoms, localized signs elsewhere, and strong urinary findings further support this.  3. Acute Bacterial Prostatitis  Likelihood: Third most likely  - Male patients, particularly elderly, with fever, systemic signs, and lower urinary tract symptoms should prompt consideration of prostatitis.  - Although not confirmed on physical examination or imaging yet, the combination of urinary symptoms and systemic inflammatory response raises this possibility.  - However, in the absence of perineal pain, digital rectal exam findings, or specific lower urinary tract symptoms like urinary retention, this remains less likely than pyelonephritis or urosepsis.  Next Diagnostic Steps  1. Urine Culture & Sensitivity – Essential to identify the uropathogen and guide downstream antimicrobial management.  2. Blood Cultures x 2 – To evaluate for bacteremia; especially pertinent given high PCT and age-related sepsis risk.  3. Renal and Bladder Ultrasound – To assess for obstruction, hydronephrosis, abscess, or residual urine volume suggestive of prostatitis or obstructive uropathy.  4. Digital Rectal Examination (DRE) – To evaluate for prostatic tenderness/swelling indicative of prostatitis.  5. Serum Creatinine & Electrolytes – Assess renal function given the possibility of upper tract involvement.  6. Non-contrast CT KUB (if patient deteriorates or ultrasound inconclusive) – To evaluate for obstructive uropathy, emphysematous changes, or abscess formation.  Let me know if you'd like a tailored differential based on imaging or further labs once available." | "Thank you for the update. Based on the abdominal CT findings, urine culture growing Escherichia coli (ESBL-negative) with a multidrug-resistant profile, and the clinical presentation consistent with acute bacterial pyelonephritis (possibly evolving into urosepsis), a broad-spectrum intravenous antimicrobial is warranted.  Optimal Empiric-to-Targeted Antibiotic Recommendation  First-line agent (targeted therapy):  Imipenem  - Dose: 500 mg IV every 6 hours (or 1 g IV every 8 hours depending on severity and renal function)  - Rationale:  - Sensitive to imipenem  - High tissue penetration (renal, perinephric), bactericidal activity  - Stable against most β-lactamases, including AmpC and some ESBLs  - Crucial given resistance to piperacillin-tazobactam, ceftriaxone, and levofloxacin  Alternative option (if carbapenem-sparing strategy is preferred and patient is clinically stable):  Cefoperazone-sulbactam  - Dose: 2 g/1 g IV every 8–12 hours  - Rationale:  - Active against the isolated strain  - Sulbactam enhances activity against β-lactamase-producing strains  - Not ideal if there's systemic involvement (i.e., signs of sepsis) compared to carbapenems  If carbapenem is contraindicated (e.g., allergy) or escalation is needed:  Tigecycline  - Dose: 100 mg IV loading dose, then 50 mg IV every 12 hours  - Rationale:  - Broad-spectrum with efficacy against MDR E. coli  - Excellent tissue penetration, including kidneys  - Not first-line due to bacteriostatic activity and poor urinary concentration, hence not ideal for monotherapy in pyelonephritis  Treatment Duration  - Uncomplicated pyelonephritis (mild/moderate, without abscess or obstruction): 10–14 days  - Complicated infection or signs of systemic sepsis: 14 days total, IV therapy for at least 5–7 days, with possible step-down to oral (if susceptible) based on clinical response  - Imaging showing perinephric exudation suggests more than mild disease → minimum 14 days, may extend to 21 days if slow clinical resolution  Other Considerations  - Renal function monitoring: Dose adjustment may be required  - Repeat cultures: Only if clinical response is suboptimal  - Consider source control: If imaging later shows abscess or obstructive uropathy, intervention may be needed  Would you like help drafting a full antimicrobial stewardship note or tailoring this based on renal function or comorbidities?" |
| Grok 3 | "As an Infectious Diseases specialist at a tertiary-care hospital, I have evaluated the case of a male in his early 70s presenting with a 5-day history of fever, chills, nausea, vomiting, and urinary symptoms (frequency, urgency, and dysuria), with no respiratory complaints. Laboratory findings include leukocytosis (WBC 11.2 × 10⁹/L), neutrophilia (78.6%), elevated interleukin-6 (IL-6 20.10 pg/mL), markedly elevated procalcitonin (27.62 ng/mL), and pyuria (urine leukocyte count 208/μL). Below, I outline the three most likely infectious disease diagnoses in order of probability, provide the rationale for each, and propose the next steps in examination based on current scientific evidence.  Diagnosis of Three Most Likely Infectious Diseases  1. Acute Pyelonephritis  - Reasoning: The patient exhibits systemic symptoms (fever, chills, nausea, vomiting) alongside localized urinary symptoms (frequency, urgency, dysuria), strongly suggesting an upper urinary tract infection involving the kidneys. Laboratory evidence of inflammation (elevated WBC, neutrophils, IL-6, procalcitonin) and pyuria (elevated urine leukocytes) supports acute pyelonephritis, a common diagnosis in elderly patients with potential complicating factors such as prostatic hypertrophy. The absence of respiratory symptoms further directs focus to the urinary tract as the primary source.  2. Urosepsis  - Reasoning: The markedly elevated procalcitonin (27.62 ng/mL) indicates a severe systemic bacterial infection, and the presence of urinary symptoms with pyuria points to the urinary tract as the origin. Urosepsis represents a progression of urinary tract infection to a systemic inflammatory response, which aligns with the patient’s clinical and laboratory profile, including leukocytosis and neutrophilia. This diagnosis is closely linked to acute pyelonephritis but emphasizes the severity of systemic involvement.  3. Bacterial Prostatitis  - Reasoning: In elderly males, acute bacterial prostatitis can present with fever, urinary symptoms (frequency, urgency, dysuria), and systemic signs, overlapping with pyelonephritis. However, it is less likely than pyelonephritis or urosepsis due to the absence of specific prostatic symptoms such as pelvic or perineal pain, and it is less common in this demographic without a clear predisposing factor like recent catheterization. The laboratory findings of infection could still be consistent, but the clinical presentation favors a renal source.  Next Plan in Examination  To confirm the diagnosis, identify the causative pathogen, and assess for complications, the following diagnostic steps are recommended based on robust scientific evidence and guidelines for managing suspected urinary tract infections and sepsis in elderly patients:  - Urine Culture: Obtain a midstream urine sample for culture and sensitivity testing to identify the causative organism and determine antibiotic susceptibility. This is essential for confirming a urinary tract source and guiding targeted therapy, particularly in complicated infections common in older adults.  - Blood Cultures: Collect at least two sets of blood cultures prior to antibiotic initiation to detect bacteremia, which is critical given the high procalcitonin level suggesting systemic spread. This aligns with sepsis evaluation protocols and aids in identifying the pathogen in cases of urosepsis.  - Abdominal CT Scan with Contrast: Perform imaging to confirm acute pyelonephritis, evaluate for complications (e.g., renal or perinephric abscess, obstruction), and exclude alternative intra-abdominal sources of infection. In elderly patients with severe presentations (e.g., procalcitonin >2 ng/mL), early imaging is supported by guidelines to ensure comprehensive assessment, especially in a tertiary-care setting where resources are available.  These steps prioritize rapid identification of the infection source and pathogen, critical for managing this patient’s severe presentation effectively. Additional tests (e.g., digital rectal exam for prostatitis) may be considered if initial results are inconclusive, but the current evidence strongly supports a urinary tract origin." | "Based on the information provided, you are seeking the best antibiotic treatment for a male patient in his early 70s presenting with a 5-day history of fever, chills, nausea, vomiting, and urinary symptoms (frequency, urgency, and dysuria), with no respiratory symptoms. The abdominal CT scan shows slight exudation around both kidneys, and the urine culture reveals Escherichia coli (ESBL-negative) with a colony count of less than 10,000 cfu/ml. The E. coli is resistant to piperacillin-tazobactam, ceftazidime, cefuroxime, levofloxacin, ceftriaxone, cefoxitin, and compound sulfamethoxazole, but sensitive to ertapenem, tigecycline, cefoperazone-sulbactam, imipenem, and amikacin. Additional lab findings include an elevated white blood cell count, high neutrophil percentage, elevated IL-6, high procalcitonin, and pyuria on urine testing, suggesting a significant bacterial infection.  Diagnosis  The clinical presentation, lab results, and imaging strongly point to acute pyelonephritis, a kidney infection likely caused by the E. coli identified in the urine culture. The high procalcitonin level raises concern for a possible systemic infection, such as urosepsis, which requires prompt and effective treatment. Although the urine colony count is low (<10,000 cfu/ml), the presence of symptoms, pyuria, and CT findings supports the diagnosis of a urinary tract infection (UTI), particularly in an elderly male where lower colony counts can still be significant.  Antibiotic Choice  Given the antibiotic sensitivity profile of the E. coli, the treatment must target a drug to which the organism is susceptible while considering the severity of the infection, the patient’s age, and potential kidney involvement. The options are:  - Ertapenem: A carbapenem with broad-spectrum activity against Gram-negative bacteria, including resistant E. coli. It is administered once daily, making it convenient, and is effective for complicated UTIs and pyelonephritis.  - Imipenem: Another carbapenem, also effective, but requires multiple daily doses and is typically reserved for more severe or resistant infections.  - Tigecycline: A broad-spectrum antibiotic, but primarily used for intra-abdominal or soft tissue infections, not a first-line choice for UTIs.  - Amikacin: An aminoglycoside, effective but potentially nephrotoxic, which is a concern in an elderly patient with kidney involvement.  - Cefoperazone-sulbactam: A cephalosporin with a beta-lactamase inhibitor, effective against Gram-negative bacteria, but less preferred compared to carbapenems for severe infections with resistance concerns.  Ertapenem is the best choice here due to its efficacy against the resistant E. coli, once-daily dosing, and suitability for pyelonephritis with possible urosepsis. It avoids the nephrotoxicity risk of amikacin and provides broader, more reliable coverage than cefoperazone-sulbactam in this context.  Dosage  The standard dosage of ertapenem for adults with normal renal function is 1 gram intravenously (IV) once daily. However, since the patient is in his early 70s and has evidence of kidney involvement, renal function must be assessed. If the creatinine clearance is ≤30 mL/min, the dose should be reduced to 500 mg IV daily. Without specific renal function data (e.g., serum creatinine), the initial recommendation assumes normal age-adjusted renal function, with adjustment as needed based on lab results.  Duration  For acute pyelonephritis, especially with a high procalcitonin level suggesting possible urosepsis, the typical duration of antibiotic therapy is 7 to 14 days. The exact length depends on:  - Clinical response: Improvement in fever, symptoms, and labs.  - Blood culture results: If bacteremia is present (blood cultures should be obtained), a 14-day course is preferred; if negative and the patient improves, 7 to 10 days may suffice.  Given the severity indicated by the high procalcitonin and systemic symptoms, starting with a plan for 7 to 14 days is appropriate, with the possibility of shortening to 7 days if the patient responds rapidly and no bacteremia is confirmed.  Treatment Plan  - Drug: Ertapenem  - Dosage: 1 gram IV daily (adjust to 500 mg daily if creatinine clearance ≤30 mL/min)  - Duration: 7 to 14 days, based on clinical response and blood culture results  Additional Considerations  - Initial IV Therapy: Given the nausea, vomiting, and severity, IV administration is necessary initially. Transition to oral antibiotics may be considered once the patient stabilizes, though this is less common with ertapenem as it is IV-only.  - Monitoring: Assess renal function (serum creatinine and creatinine clearance) before finalizing the dose, obtain blood cultures to rule out bacteremia, and monitor for clinical improvement.  - Allergies: No allergies are mentioned, but if the patient has a carbapenem allergy, an alternative (e.g., amikacin or cefoperazone-sulbactam) would be needed.  Final Recommendation  The best antibiotic treatment for this patient is ertapenem 1 gram IV daily (adjusted to 500 mg daily if creatinine clearance ≤30 mL/min), for 7 to 14 days, tailored to clinical response and microbiological findings. This regimen effectively targets the resistant E. coli, addresses the severity of the infection, and accounts for the patient’s age and condition." |
| Gemini 2.5 Flash | "Based on the patient's clinical presentation and laboratory findings, the constellation of symptoms strongly points to a severe systemic infection originating from the urinary tract. The advanced age, male gender, and lack of respiratory symptoms further guide the differential diagnosis.  Differential Diagnosis  1. Acute Pyelonephritis with Urosepsis: This is the most probable diagnosis. The classic triad of fever, chills, and dysuria, combined with a significant inflammatory response evident in the elevated white blood cell count and pyuria, is highly suggestive of acute pyelonephritis. The extremely high serum procalcitonin level (27.62 ng/mL) is a powerful biomarker that indicates a high likelihood of concurrent bacteremia and severe sepsis originating from the urinary tract, fulfilling the criteria for urosepsis.  2. Complicated Urinary Tract Infection (UTI) with Urosepsis (e.g., Prostatitis, Epididymo-orchitis): In an elderly male, a complicated UTI should be considered as the source of bacteremia. The patient’s symptoms could be secondary to an infection of the prostate or epididymis. These deep-seated infections can lead to significant systemic inflammation and bacteremia, particularly when underlying urinary retention or prostatic hyperplasia is present.  3. Bacteremia from an Occult Source: While the urinary tract is the overwhelmingly likely primary source, a definitive infectious diagnosis cannot be made without microbiological culture results. Given the high-grade systemic inflammatory response, it is a possibility that the fever and bacteremia originate from an occult source (e.g., an intra-abdominal abscess or endovascular infection), with the UTI being a co-existing or secondary finding.  Proposed Next Steps in Examination  1. Microbiological Studies:  Urine Culture and Susceptibility: A midstream urine specimen should be obtained for a definitive culture to identify the causative uropathogen and its antimicrobial resistance profile. This is the cornerstone of diagnosis for a UTI.  Blood Cultures: At least two sets of blood cultures should be drawn from different sites to confirm bacteremia and identify the bloodstream pathogen. This is a critical step given the patient's high procalcitonin level and signs of systemic infection.  2. Imaging:  Renal and Bladder Ultrasound: An ultrasound of the kidneys and bladder should be performed to evaluate for potential complications of pyelonephritis, such as urinary tract obstruction (e.g., due to an enlarged prostate or urolithiasis) or the presence of a renal or perinephric abscess.  3. Biochemical Monitoring:  Serial Blood Tests: Monitor renal function (creatinine, BUN) and serum lactate levels to assess for acute kidney injury and tissue hypoperfusion, which are key indicators of the severity of sepsis." | "Based on the new information from the abdominal CT scan and the urine culture, the diagnosis of acute pyelonephritis with urosepsis caused by a multi-drug resistant Escherichia coli is confirmed. The presence of perirenal exudation on CT validates the severity of the infection. The urine culture is crucial, as it reveals a significant antimicrobial resistance profile, necessitating a targeted treatment plan. The low colony count in the urine, while unusual, is not unexpected in the context of a systemic infection where the pathogen may be primarily in the bloodstream and tissue rather than the bladder lumen.  Best Antibiotic Treatment Plan  Given the patient's severe clinical presentation and the confirmed resistance of the E. coli isolate to multiple beta-lactams and fluoroquinolones, a carbapenem is the most appropriate first-line therapy.  Drug Choice: Etapenem is the preferred agent due to its strong activity against this organism, its once-daily dosing, and its carbapenem-sparing nature (it does not have activity against Pseudomonas aeruginosa or Acinetobacter spp., reserving other carbapenems for more resistant infections).  Alternative Choices: Imipenem is another effective carbapenem. Cefoperazone-sulbactam and Amikacin are also viable options based on the susceptibility testing. However, a carbapenem offers the most reliable and broad coverage for this presentation.  Dosage: The standard dosage for a severe, complicated urinary tract infection with bacteremia is Etapenem 1 g IV every 24 hours. This dosage should be adjusted if the patient has renal impairment, and drug levels should be monitored if significant kidney injury occurs.  Length of Use: The duration of therapy for complicated pyelonephritis with bacteremia is typically 10 to 14 days.  The patient should be started on intravenous therapy. Once he is afebrile for at least 24-48 hours and his clinical condition is significantly improved, a transition to a highly bioavailable oral antibiotic (if one with appropriate susceptibility is available, such as an agent not on the resistance list) can be considered to complete the course. However, given the extensive resistance, completing the entire course with an intravenous carbapenem is a safe and effective approach." |

## Supplementary Table 4. Clinical characteristics and LLM responses of Case 4

| Medical history summary | A female in her late 50s admitted to the hospital due to "fever for 4 days". The patient had a fever 4 days ago, with a maximum temperature of 39 ℃, accompanied by chills, nausea, chest pain on the right side, no vomiting, diarrhea, cough or sputum. Self administered antipyretic medication did not alleviate symptoms. The blood test showed white blood cell count 17.3 × 10 ^ 9/L; Whole blood CRP 246.0mg/L; Abdominal CT plain scan showed Low density lesion in the liver. Gallstones, no obvious abnormalities on lung CT | |
| --- | --- | --- |
| Laboratory and imaging findings | Enhanced CT scan of the entire abdomen showed lesions in liver segments VII and VI, with abscess being the first consideration. Ultrasound contrast imaging suggests liver abscess. Under the guidance of B-ultrasound, 150ml of foul smelling fluid was extracted from liver abscess puncture and drainage surgery. Both blood culture and puncture fluid culture showed Klebsiella pneumoniae infection (negative for extended spectrum β - lactase) | |
| Answers | Preliminary Diagnosis and Investigations Strategy | Treatment Strategy |
| DeepSeek-R1 | "Based on the provided clinical presentation, laboratory findings, and imaging results, the three most likely infectious diagnoses, arranged in order of probability, are:  1. Pyogenic Liver Abscess  Rationale: The presence of fever, leukocytosis (WBC 17.3 × 10^9/L), markedly elevated CRP (246 mg/L), and a hypodense liver lesion on CT strongly suggest a pyogenic liver abscess. Right-sided chest pain may be due to diaphragmatic irritation. Gallstones raise the possibility of biliary origin (e.g., ascending cholangitis seeding the liver). Blood cultures and abscess drainage (if feasible) should be prioritized.  2. Acute Cholangitis (Ascending Cholangitis)  Rationale: Fever, leukocytosis, and gallstones are classic for cholangitis, though the absence of jaundice or abdominal pain is atypical. A liver abscess could complicate biliary obstruction. Elevated CRP supports systemic infection. MRCP or ERCP would be diagnostic/therapeutic to assess biliary obstruction and obtain cultures.  3. Bacterial Pneumonia with Parapneumonic Effusion  Rationale: Fever and right-sided chest pain could indicate pneumonia, though the lack of cough/sputum and normal lung CT reduce its likelihood. A small effusion or early consolidation may not yet be visible. Procalcitonin could help differentiate bacterial infection; repeat imaging if symptoms persist.  Next Steps in Examination:  Blood Cultures (aerobic/anaerobic) before antibiotics.  Liver Abscess Confirmation: Contrast-enhanced abdominal CT or ultrasound-guided aspiration for culture (Gram stain, aerobic/anaerobic, fungal, TB if indicated).  Biliary Evaluation: MRCP or ERCP if cholangitis is suspected (elevated bilirubin/ALP would strengthen this).  Additional Labs: Procalcitonin (to further assess bacterial infection), LFTs (cholestatic pattern supports cholangitis), and serologies (amebic serology if travel history suggests exposure).  Echocardiogram if endocarditis is a concern (e.g., new murmur or embolic phenomena).  Would you like further refinement based on additional findings (e.g., travel history, risk factors for TB/amebiasis)?" | "Optimal Antibiotic Regimen for Klebsiella pneumoniae Liver Abscess  Based on Susceptibility, Drainage Success, and Current Guidelines (IDSA/WSES):  1. Initial Empiric Therapy (Pending Susceptibility)  Preferred Regimen:  Ceftriaxone (2 g IV every 24 hours) + Metronidazole (500 mg IV every 8 hours).  Rationale: Ceftriaxone covers susceptible K. pneumoniae; metronidazole addresses foul-smelling pus (suggestive of anaerobic co-infection, though cultures may not always isolate anaerobes).  Alternative for Broader Coverage:  Piperacillin-Tazobactam (4.5 g IV every 6 hours).  Rationale: Broader anaerobic and Gram-negative coverage if polymicrobial infection is suspected.  2. Definitive Therapy (Post-Culture Results)  De-escalate to Monotherapy:  Ceftriaxone (2 g IV daily) alone, as the isolate is non-ESBL and susceptible.  Rationale: Narrow-spectrum therapy minimizes resistance risk. Discontinue metronidazole if anaerobes are excluded.  3. Transition to Oral Therapy (If Clinically Stable)  Oral Step-Down Option:  Ciprofloxacin (750 mg orally every 12 hours) + Metronidazole (500 mg orally every 8 hours).  Rationale: Fluoroquinolones achieve high hepatic concentrations. Continue metronidazole only if anaerobic involvement is confirmed/suspected.  4. Duration of Therapy  Total Duration: 3–4 weeks (IV + oral combined).  Shorter courses (e.g., 2 weeks post-drainage) may suffice if:  Abscess is fully drained.  Clinical improvement (afebrile, normalized CRP/WBC).  Follow-up imaging shows resolution.  Critical Monitoring:  Repeat abdominal imaging (US/CT) at 2–3 weeks to confirm abscess resolution.  5. Adjunctive Considerations  Source Control: Ensure drainage catheter remains functional until output diminishes (<10–20 mL/day).  Metastatic Infection Screening:  Fundoscopic exam to exclude endogenous endophthalmitis (rare but critical in Klebsiella bacteremia).  Blood culture clearance (repeat if persistent fever).  Evidence Base:  IDSA guidelines (2017) favor β-lactams (e.g., ceftriaxone) for susceptible Enterobacteriaceae.  WSES (2023) recommends 3–4 weeks total therapy for drained abscesses, with oral transition after 1–2 weeks of IV therapy.  Studies show no added benefit of anaerobic coverage in culture-confirmed monomicrobial Klebsiella abscesses, but initial empiric coverage is prudent.  Conclusion: Ceftriaxone monotherapy (2 g IV daily for 3–4 weeks, with oral transition if feasible) is optimal here. Tailor duration to clinical/imaging response." |
| ChatGPT-5 | "Based on the clinical presentation, laboratory findings, and imaging results, the three most probable infectious disease diagnoses in this case are:  1. Pyogenic Liver Abscess (PLA)  Rationale:  The patient presents with high-grade fever, chills, right-sided chest pain, and a markedly elevated WBC and CRP. These findings, in conjunction with the low-density hepatic lesion on abdominal CT, are highly suggestive of a pyogenic liver abscess, particularly in the absence of other intra-abdominal infectious foci. The right-sided chest pain may be referred pain due to diaphragmatic irritation.  2. Amebic Liver Abscess (ALA)  Rationale:  Although less common in older adults in non-endemic regions, amebic liver abscess remains a differential given the liver lesion, systemic inflammatory response, and gastrointestinal prodrome (nausea). The lack of pulmonary involvement and gastrointestinal symptoms such as diarrhea does not exclude Entamoeba histolytica infection, particularly in endemic or travel-exposed individuals. However, the absence of classic risk factors (e.g., recent travel to endemic areas, male sex predominance) places this diagnosis below PLA.  3. Acute Cholangitis  Rationale:  Gallstones are present, and the elevated inflammatory markers with systemic symptoms raise suspicion for acute cholangitis. However, the absence of jaundice or documented biliary ductal dilatation on imaging, as well as the lack of hypotension or mental status changes, argues against full-blown cholangitis. Still, this remains a plausible diagnosis given the biliary tract pathology.  Next Diagnostic Steps:  1. Contrast-enhanced abdominal CT or MRI with liver protocol – to better characterize the hepatic lesion (e.g., multiloculated abscess, rim enhancement) and delineate between pyogenic and amebic abscess.  2. Blood cultures (×2 sets) – prior to antibiotics, to identify causative pathogens (commonly Klebsiella pneumoniae or E. coli in PLA).  3. Serologic testing for Entamoeba histolytica antibodies – particularly if risk factors or imaging findings are suggestive.  4. Ultrasound-guided aspiration or drainage of the hepatic lesion – for microbiological culture and Gram stain, essential for differentiating PLA vs ALA and confirming the diagnosis.  5. Liver function tests and bilirubin panel – to evaluate for subclinical biliary obstruction and assess for cholangitis.  6. Review travel history, comorbidities (e.g., diabetes), and recent gastrointestinal symptoms – to refine risk assessment for ALA or PLA.  Would you like to explore specific microbiological investigations or consider non-infectious mimics of the liver lesion as well?" | "Thank you for the detailed update. Based on the confirmed diagnosis of a pyogenic liver abscess (PLA) due to Klebsiella pneumoniae, with no evidence of ESBL production, and successful image-guided drainage, the optimal antibiotic regimen can now be defined.  Diagnosis:  Monomicrobial Klebsiella pneumoniae pyogenic liver abscess, post-percutaneous drainage, ESBL-negative strain.  Antibiotic Treatment Strategy:  1. Empiric/Definitive Antibiotic Choice:  Since the causative organism is K. pneumoniae, and susceptibility testing shows no ESBL production:  > Ceftriaxone is the preferred first-line agent in this setting.  - Drug: Ceftriaxone  - Dose: 2 g IV once daily  - Route: Intravenous  - Rationale: High biliary penetration, bactericidal, active against K. pneumoniae, and effective for community-acquired liver abscess.  Alternative if allergic to β-lactams:  - Levofloxacin 750 mg IV daily (if organism is fluoroquinolone-susceptible), although monotherapy with fluoroquinolones is generally second-line due to rising resistance and lower efficacy in anaerobic co-infection.  Duration of Antibiotic Therapy:  - Total duration: 4 to 6 weeks  - IV phase: 2–3 weeks of intravenous therapy (until clinical improvement, afebrile state, resolution or significant regression of abscess cavity on imaging).  - Oral step-down: If the patient is improving, and cultures confirm K. pneumoniae sensitive to oral agents (e.g., levofloxacin or amoxicillin-clavulanate), step down to oral antibiotics to complete the course.  - A repeat imaging (preferably ultrasound or CT) is typically performed around day 10–14 to guide the step-down and determine abscess resolution.  Additional Considerations:  - Monitor for potential gas-forming liver abscesses, especially in diabetic patients—associated with more aggressive K. pneumoniae strains.  - Maintain drain patency, monitor output daily, and consider removal when output is minimal and cavity collapses on imaging.  Would you like assistance constructing a full management algorithm or patient monitoring checklist for PLA?" |
| Grok 3 | "As an Infectious Diseases specialist, I have evaluated the case of this female patient in her late 50s presenting with a 4-day history of fever (maximum 39°C), chills, nausea, right-sided chest pain, and no alleviation of symptoms with antipyretics. Based on the clinical presentation and available data—white blood cell count of 17.3 × 10^9/L, C-reactive protein (CRP) of 246.0 mg/L, and an abdominal CT showing a low-density lesion in the liver and gallstones, with a normal lung CT—below are the three most likely infectious disease diagnoses, ranked in order of probability. Each diagnosis is supported by reasoning grounded in the clinical and imaging findings, and I have outlined the next steps in examination to refine the diagnostic approach. These recommendations align with current evidence-based practices in infectious diseases.  1. Liver Abscess  - Reasoning: The presence of a low-density lesion in the liver on abdominal CT strongly suggests a liver abscess, particularly in the context of fever, chills, and markedly elevated inflammatory markers (WBC 17.3 × 10^9/L, CRP 246.0 mg/L), indicating a robust systemic inflammatory response. Gallstones identified on CT may predispose to biliary tract infections, a common etiology of pyogenic liver abscesses, often caused by organisms such as Klebsiella pneumoniae or Escherichia coli. The absence of respiratory symptoms and a normal lung CT make a pulmonary source unlikely, focusing attention on a hepatic origin.  - Next Step in Examination: Perform a contrast-enhanced CT or ultrasound of the liver to further characterize the low-density lesion and confirm the presence of an abscess. Obtain blood cultures (at least two sets) to identify the causative organism, which is critical for tailoring subsequent management.  2. Cholangitis  - Reasoning: Acute cholangitis, an infection of the bile ducts, is a plausible diagnosis given the presence of gallstones, which can obstruct biliary flow and precipitate infection, typically by enteric pathogens such as E. coli or Enterococcus species. The patient’s fever, elevated WBC, and CRP align with this diagnosis, though the absence of reported jaundice or abdominal pain (classic components of Charcot’s triad) reduces its likelihood compared to a liver abscess. Right-sided chest pain could reflect referred pain from biliary inflammation, though this is less specific.  - Next Step in Examination: Conduct an ultrasound or magnetic resonance cholangiopancreatography (MRCP) to assess for bile duct dilation or obstruction due to gallstones. Order liver function tests (e.g., bilirubin, alkaline phosphatase, and transaminases) to evaluate for evidence of biliary obstruction or hepatocellular involvement.  3. Complicated Urinary Tract Infection (UTI) or Pyelonephritis  - Reasoning: A complicated UTI or pyelonephritis could account for the fever, chills, and systemic inflammation (elevated WBC and CRP), particularly if the infection has ascended or hematogenously spread, though this is less likely given the absence of urinary symptoms (e.g., dysuria, frequency) or renal abnormalities on CT. The liver lesion and gallstones could be incidental findings unrelated to the infection, and atypical presentations of UTI are possible, especially in older adults. However, the hepatic focus on imaging makes this diagnosis less probable than the above alternatives.  - Next Step in Examination: Perform a urinalysis and urine culture to detect pyuria, bacteriuria, or nitrites suggestive of urinary tract infection. This should be pursued if liver abscess and cholangitis are ruled out, given the lower pretest probability based on current findings.  Summary of Diagnostic Approach  - Most Likely Diagnosis: Liver Abscess  - Next Step: Contrast-enhanced CT or ultrasound of the liver; blood cultures.  - Second Likely Diagnosis: Cholangitis  - Next Step: Ultrasound or MRCP; liver function tests.  - Third Likely Diagnosis: Complicated UTI or Pyelonephritis  - Next Step: Urinalysis and urine culture.  Given the prominence of the low-density liver lesion and the gallstone findings, I recommend prioritizing evaluation for a liver abscess with contrast-enhanced imaging and blood cultures. These steps will provide critical diagnostic clarity and guide further management. If results are inconclusive, proceed with investigations for cholangitis, followed by UTI if necessary. This stepwise approach reflects the most robust evidence for diagnosing hepatobiliary and systemic infections in the tertiary-care setting.  _Disclaimer: Grok is not a doctor; please consult one. Don't share information that can identify you._" | "To determine the best antibiotic treatment for your case, including the drug choice, dosage, and duration, let’s consider the details provided. You have a liver abscess in segments VII and VI of the liver, confirmed by enhanced CT and ultrasound contrast imaging. Under ultrasound guidance, 150 ml of foul-smelling fluid was drained, and cultures from both the abscess fluid and blood grew Klebsiella pneumoniae, which is negative for extended-spectrum beta-lactamase (ESBL). This information guides us toward an effective treatment plan.  Step 1: Understanding the Infection  Klebsiella pneumoniae is a gram-negative bacterium commonly associated with severe infections, including liver abscesses. The fact that it is non-ESBL-producing is significant, as it suggests the bacterium is likely susceptible to a wider range of antibiotics compared to ESBL-producing strains. The abscess has already been drained (150 ml is a substantial volume), which is a critical step in managing pyogenic liver abscesses. Now, antibiotic therapy is needed to treat the remaining infection in the liver tissue, address the bacteremia (since blood cultures are positive), and prevent recurrence or complications.  Step 2: Antibiotic Selection  For liver abscesses caused by non-ESBL Klebsiella pneumoniae, the antibiotic must:  - Be effective against gram-negative bacteria, specifically Klebsiella pneumoniae.  - Achieve good penetration into liver tissue and the abscess cavity (though drainage reduces the need for deep abscess penetration).  - Address potential anaerobic involvement, given the foul-smelling nature of the fluid, which could suggest anaerobes even if not cultured.  Options Considered:  1. Ceftriaxone: A third-generation cephalosporin with excellent activity against non-ESBL Klebsiella pneumoniae. It penetrates well into tissues, including the liver, and is a standard choice for gram-negative infections.  2. Metronidazole: Highly effective against anaerobic bacteria, which may be present given the foul odor, even if only Klebsiella was cultured (anaerobes can be difficult to grow in culture).  3. Piperacillin-tazobactam: A broad-spectrum beta-lactam/beta-lactamase inhibitor combination that covers gram-negative bacteria (including Klebsiella) and anaerobes, making it a potential single-agent option.  4. Carbapenems (e.g., Meropenem): Very effective against gram-negative bacteria and anaerobes, but typically reserved for resistant infections. Since this strain is non-ESBL, a carbapenem may be unnecessarily broad.  Chosen Regimen:  A combination of ceftriaxone and metronidazole is selected as the best approach. Here’s why:  - Ceftriaxone targets Klebsiella pneumoniae effectively, given its non-ESBL status, and has good liver penetration. It’s a standard choice in many guidelines for gram-negative infections.  - Metronidazole adds coverage for potential anaerobes, which is prudent given the foul-smelling fluid, a clue to possible mixed infection despite the culture results showing only Klebsiella.  - This combination avoids overly broad-spectrum agents like carbapenems, preserving them for resistant cases, and provides a practical regimen (ceftriaxone’s once-daily dosing is convenient).  While piperacillin-tazobactam alone could cover both gram-negatives and anaerobes, the combination of ceftriaxone and metronidazole is equally effective, aligns with common practice for liver abscesses, and leverages ceftriaxone’s efficacy against Klebsiella.  Step 3: Dosage  - Ceftriaxone: For severe infections like a liver abscess with bacteremia, a higher dose is appropriate. The standard is 2 grams intravenously (IV) once daily. This ensures adequate tissue levels.  - Metronidazole: For serious anaerobic infections, the typical dose is 500 mg IV every 8 hours. This provides consistent coverage throughout the day.  Step 4: Duration of Therapy  The duration of antibiotic treatment for a liver abscess depends on:  - The adequacy of drainage (here, 150 ml was removed, suggesting effective drainage).  - The clinical response (e.g., resolution of fever, normalization of inflammatory markers).  - The presence of bacteremia (positive blood cultures indicate systemic spread).  - The size and resolution of the abscess on follow-up imaging.  For pyogenic liver abscesses, after successful drainage:  - Antibiotics are typically continued for 4-6 weeks in total.  - Initial IV therapy is given until the patient shows clinical improvement (e.g., afebrile for 48-72 hours, reduced drainage, and stable condition), often lasting 2-3 weeks.  - If the strain is susceptible to oral antibiotics (e.g., fluoroquinolones like ciprofloxacin), a switch to oral therapy can complete the course, guided by clinical response and imaging to confirm abscess resolution.  Given the large volume of fluid (150 ml) and bacteremia, a total duration of 6 weeks is reasonable to ensure complete eradication, especially since Klebsiella liver abscesses can be aggressive. However, flexibility is key—shorter durations (e.g., 4 weeks) may suffice if the patient improves rapidly and imaging shows resolution.  Step 5: Transition to Oral Therapy  Since susceptibility data beyond “non-ESBL” isn’t provided, we assume typical patterns for non-ESBL Klebsiella pneumoniae. It’s often susceptible to fluoroquinolones (e.g., ciprofloxacin or levofloxacin). After initial IV therapy, if susceptibility is confirmed, switching to ciprofloxacin 500 mg orally twice daily could complete the course. Without susceptibility results, IV therapy may need to continue longer, but in practice, fluoroquinolones are a common oral step-down option.  Final Treatment Plan  Here’s the complete recommendation:  - Drug Choice:  - Ceftriaxone + Metronidazole  - Dosage:  - Ceftriaxone: 2 g IV once daily  - Metronidazole: 500 mg IV every 8 hours  - Length of Antibiotic Use:  - Total duration: 4-6 weeks  - Initial IV therapy with ceftriaxone and metronidazole for at least 2-3 weeks, until clinical improvement (e.g., afebrile for 48-72 hours, minimal drainage).  - Then, if the strain is susceptible, switch to an oral antibiotic (e.g., ciprofloxacin 500 mg orally twice daily) to complete 4-6 weeks, guided by follow-up imaging (ultrasound or CT) and clinical response.  - If oral options are unsuitable or susceptibility isn’t confirmed, continue IV therapy for the full duration.  Additional Notes  - Monitoring: Regular follow-ups with imaging (e.g., ultrasound) and labs (e.g., white blood cell count, C-reactive protein) are essential to assess abscess resolution and guide duration.  - Adjustments: If susceptibility testing becomes available, adjust antibiotics accordingly (though non-ESBL status strongly supports ceftriaxone’s efficacy).  - Considerations: If you have diabetes or other risk factors (not mentioned here), a more aggressive approach might be warranted, but this plan is robust for the given data.  This regimen effectively targets your Klebsiella pneumoniae liver abscess, accounts for potential anaerobes, and balances efficacy with practical dosing and stewardship principles.  _Disclaimer: Grok is not a doctor; please consult one. Don't share information that can identify you._" |
| Gemini 2.5 Flash | "Based on the patient's clinical presentation, laboratory findings, and especially the abdominal CT scan results, the constellation of symptoms strongly points towards an intra-abdominal infectious process. The combination of fever, right-sided chest pain (likely referred right upper quadrant pain), and a focal liver lesion is highly suggestive of a serious hepatobiliary infection.  Differential Diagnosis  1. Pyogenic Liver Abscess: This is the most likely diagnosis. The patient's clinical picture of high fever, chills, and localized pain, coupled with the marked systemic inflammatory response (leukocytosis and extremely high CRP), is a classic presentation. The abdominal CT finding of a low-density liver lesion is the radiological hallmark of a liver abscess. The presence of gallstones is a significant risk factor, as they can lead to ascending biliary infection, a common etiology for pyogenic liver abscesses.  2. Acute Cholangitis: This is a strong consideration and is frequently a co-existing condition with, or precursor to, a liver abscess. The patient's history of gallstones and symptoms of fever, chills, and right upper quadrant pain fit Charcot's triad for cholangitis. Infection can ascend from the biliary tree, and if left untreated, can lead to bacteremia and the formation of a liver abscess.  3. Amoebic Liver Abscess: While less common in non-endemic regions, an amoebic liver abscess caused by Entamoeba histolytica should be included in the differential. The clinical presentation and radiographic appearance on plain CT can be indistinguishable from a pyogenic abscess. A detailed history, including travel to or residence in endemic areas, would increase or decrease the suspicion for this etiology.  Proposed Next Steps in Examination  1. Microbiological and Serological Studies:  Blood Cultures: Obtain at least two sets of blood cultures to identify the causative organism and its antimicrobial susceptibility. Blood cultures are positive in approximately 50% of pyogenic liver abscess cases.  Serology: Perform serological testing for Entamoeba histolytica antibodies to differentiate an amoebic from a pyogenic abscess. This is a crucial step to guide specific therapy.  2. Advanced Imaging and Interventional Procedure:  Abdominal CT with Contrast: A repeat CT scan of the abdomen with intravenous contrast should be performed to better characterize the liver lesion, define its size and extent, and evaluate the biliary tree for any evidence of obstruction or dilation.  Ultrasound- or CT-Guided Aspiration: A percutaneous, image-guided aspiration of the liver abscess should be performed. The aspirate should be sent for Gram stain, aerobic and anaerobic bacterial cultures, and potentially fungal cultures to definitively identify the pathogen and obtain a targeted antibiogram. This is the gold standard for diagnosis and is often therapeutic.  3. Biochemical Monitoring:  Liver Function Tests: A comprehensive liver function panel, including alkaline phosphatase, bilirubin, and transaminases (AST, ALT), should be obtained to assess for hepatobiliary dysfunction.  Serial Inflammatory Markers: Continue to monitor white blood cell count and C-reactive protein to track the systemic inflammatory response and response to subsequent interventions." | "Based on the confirmed findings from the enhanced CT, ultrasound, and the microbiological cultures, the patient has a pyogenic liver abscess with associated bacteremia caused by a non-ESBL producing Klebsiella pneumoniae. The successful aspiration of a significant volume of foul-smelling fluid confirms the abscess and provides a crucial source of pathogen identification. This organism is known for its ability to cause severe, invasive infections, particularly in the liver.  Best Antibiotic Treatment Plan  The management of a pyogenic liver abscess requires both adequate source control, which has been initiated with the percutaneous drainage, and targeted, prolonged antibiotic therapy. The susceptibility profile of the Klebsiella pneumoniae isolate is a primary determinant for drug choice.  Drug Choice: Since the organism is not an ESBL producer, a third-generation cephalosporin is the optimal first-line agent. Ceftriaxone is an excellent choice due to its potent activity against this organism, its good tissue penetration, and its convenient once-daily dosing, which facilitates a streamlined treatment course.  Rationale: The isolate is sensitive to Cefoperazone-sulbactam, which is a suitable alternative. However, the resistance to other cephalosporins (Ceftazidime, Ceftriaxone) in the initial culture report was likely due to a laboratory error or a different strain; the current report of ESBL-negative and sensitive to key agents is the definitive guide. Carbapenems (Etapenem, Imipenem) are highly effective but are unnecessarily broad-spectrum for this ESBL-negative organism and should be reserved for more resistant pathogens.  Dosage: The standard dosage for a severe infection like a liver abscess with bacteremia is Ceftriaxone 2 g IV every 24 hours. This high-end dosage ensures optimal drug concentration to treat both the bacteremia and the deep-seated abscess.  Length of Use: The total duration of antibiotic therapy for a pyogenic liver abscess is prolonged, typically 4 to 6 weeks. The duration should be guided by the patient’s clinical and radiological response.  Intravenous Phase: The patient should remain on intravenous Ceftriaxone until they are afebrile for at least 24-48 hours and their inflammatory markers (WBC, CRP) are significantly improving or have normalized. This initial phase typically lasts for 2 to 3 weeks.  Step-down to Oral Therapy: Once clinically stable, the patient can be transitioned to an oral antibiotic to complete the course. The choice of oral agent must be guided by the susceptibility of the original isolate and confirmed with a test for an oral agent. A suitable oral agent would be a fluoroquinolone like Ciprofloxacin, or Amoxicillin-Clavulanate if the isolate is sensitive.  Monitoring: The patient should undergo a follow-up CT or ultrasound scan, ideally after 2 to 3 weeks of therapy, to assess the size and resolution of the abscess. The total duration of therapy is a clinical decision based on the resolution of symptoms and the size reduction of the abscess on imaging." |

## Supplementary Table 5. Clinical characteristics and LLM responses of Case 5

| Medical history summary | A female in her early 30s admitted to the hospital due to "fever, cough, sputum for 1 week, headache for 2 days". The patient developed a fever one week ago after catching a cold, with a maximum temperature of 38.2 ℃, accompanied by cough, sputum, white phlegm and runny nose. There was no dizziness or headache at that time. It was not treated and later subsided on its own; Three days ago, she experienced tinnitus in her right ear, hearing loss, severe head and neck pain, and head and neck movement disorders. She frequently vomited. Blood test found WBC 34.5×10^9/L、CRP 109 mg/L、K 2.6 mmol/L、PCT 49.63 ng/ml，intravenous infusion of 4.5g piperacillin tazobactam sodium twice did not show significant improvement in the above symptoms | |
| --- | --- | --- |
| Laboratory and imaging findings | Cerebrospinal fluid examination: Pan's test positive, nucleated cells 7044.00/μ L, neutrophils 90%, protein 287.9mg/dL, glucose 1.65mmol/L , chloride 116.4 mmol/L. Cerebrospinal fluid NGS: Streptococcus pneumoniae sequence number 177 | |
| Answers | Preliminary Diagnosis and Investigations Strategy | Treatment Strategy |
| DeepSeek-R1 | "Based on the clinical presentation and laboratory findings, the three most likely infectious diseases, in order of probability, are:  1. Bacterial Meningitis (Most Likely)  Rationale: The patient’s severe headache, neck pain, movement restriction, vomiting, and markedly elevated inflammatory markers WBC 34.5×10^9/L、CRP 109 mg/L、K 2.6 mmol/L、PCT 49.63 ng/ml) strongly suggest bacterial meningitis. The preceding upper respiratory symptoms may indicate hematogenous or contiguous spread. The lack of response to piperacillin-tazobactam could imply resistance (e.g., S. pneumoniae, N. meningitidis, or Listeria in immunocompromised hosts).  2. Otogenic Intracranial Complications (e.g., Sinusitis/Mastoiditis with CNS Extension)  Rationale: The history of cold-like symptoms followed by tinnitus, hearing loss, and severe head/neck pain raises concern for otogenic or sinusogenic intracranial extension (e.g., mastoiditis, petrositis, or septic venous thrombosis). Elevated WBC/CRP/PCT supports a severe bacterial process.  3. Severe Community-Acquired Pneumonia (CAP) with Systemic Sepsis  Rationale: While less likely given the neurologic focus, atypical CAP (e.g., Legionella, M. pneumoniae) or bacterial pneumonia with bacteremic spread could explain fever, cough, and extreme inflammation. However, the absence of prominent respiratory distress and the dominance of CNS symptoms lower this possibility.  Next Steps in Examination  Neurologic & ENT Evaluation:  Lumbar puncture (LP) with CSF analysis (cell count, glucose, protein, Gram stain, culture, PCR for S. pneumoniae/N. meningitidis/Listeria, HSV/VZV if indicated).  MRI Brain with contrast (to assess for meningitis, abscess, venous thrombosis, or mastoiditis complications).  Otoscopy & ENT consult (evaluate for otitis media/mastoiditis).  Microbiologic Workup:  Blood cultures (x2 sets, prior to antibiotics if possible).  Nasopharyngeal swab for respiratory pathogens (PCR for S. pneumoniae, N. meningitidis, viruses).  Metabolic & Secondary Workup:  Repeat electrolytes (severe hypokalemia [K 2.6] may exacerbate symptoms).  Serum procalcitonin trend (to monitor response).  Imaging:  CT Head (non-contrast first if LP planned) to rule out mass effect before LP.  CT/MR Venography if intracranial venous thrombosis is suspected.  Urgent neurology/ID consultation is warranted given the rapid progression and risk of neurologic sequelae. Would you like further refinement based on imaging/CSF results?" | "Given the CSF findings (neutrophilic pleocytosis, elevated protein, hypoglycorrhachia) and positive Streptococcus pneumoniae on CSF NGS, this is a confirmed case of acute bacterial meningitis due to S. pneumoniae. Below are the evidence-based treatment recommendations:  1. Empiric Antibiotic Therapy (Immediate Adjustment)  Preferred Regimen:  Vancomycin (15–20 mg/kg IV q8–12h, adjusted to trough 15–20 μg/mL) PLUS  Ceftriaxone (2 g IV q12h) PLUS  Dexamethasone (0.15 mg/kg IV q6h for 2–4 days, started before or with antibiotics).  Rationale:  Ceftriaxone covers S. pneumoniae (including penicillin-nonsusceptible strains, depending on local resistance).  Vancomycin is added due to rising global pneumococcal resistance (e.g., ceftriaxone MIC ≥1 μg/mL).  Dexamethasone reduces mortality and neurologic sequelae in pneumococcal meningitis (IDSA 2016 guidelines).  Alternative if PCN Allergy:  Moxifloxacin (400 mg IV q24h) + Vancomycin (if ceftriaxone contraindicated).  2. Targeted Therapy (After Confirming S. pneumoniae)  If isolate is ceftriaxone-susceptible (MIC ≤0.5 μg/mL):  Ceftriaxone monotherapy (2 g IV q12h).  If ceftriaxone-resistant (MIC ≥1 μg/mL):  Continue vancomycin + ceftriaxone (synergy improves CSF penetration).  3. Duration of Therapy  14 days total (minimum; extend to 21 days if slow clinical response, complications, or immunocompromised).  4. Adjunctive Measures  Correct hypokalemia (K 2.6 mmol/L→ IV KCl repletion).  Monitor for complications:  Repeat LP at 48h if no clinical improvement (to confirm sterilization).  MRI Brain if neurologic deterioration (rule out abscess, ventriculitis).  5. Follow-Up & Resistance Considerations  Repeat CSF culture at 48h if persistent fever/neurologic symptoms.  Check pneumococcal serotype/vaccination history (if available, to guide long-term prophylaxis).  Note: If the patient deteriorates or CSF cultures reveal resistance to ceftriaxone/vancomycin, consider adding rifampin (600 mg IV q24h) or consulting ID for salvage options (e.g., linezolid).  Would you like additional guidance on supportive care or complications management?" |
| ChatGPT-5 | "Given the clinical presentation and laboratory data, three infectious diseases should be considered as the most likely differential diagnoses, ranked by probability:  1. Bacterial Meningitis (most likely)  The acute onset of headache, neck stiffness, photophobia, vomiting, fever, and cranial nerve involvement (right-sided tinnitus and hearing loss) is highly suggestive of meningeal inflammation, most likely bacterial in origin.  Laboratory results demonstrate marked leukocytosis (WBC 34.5 ×10⁹/L), high CRP (109 mg/L), and extremely elevated procalcitonin (49.63 ng/mL) — all pointing toward a severe systemic bacterial infection, compatible with purulent meningitis, possibly from hematogenous spread or direct extension from a parameningeal site.  2. Acute Otogenic Meningitis (secondary to bacterial otitis media or mastoiditis)  The presence of unilateral tinnitus, hearing loss, and subsequent neurologic signs raises strong suspicion for direct intracranial extension of an underlying suppurative otitis media or mastoiditis, which can cause meningitis via contiguous spread.  The progression from upper respiratory symptoms to otologic involvement followed by meningeal signs is characteristic of this route of infection, especially in young adults. The persistent severe symptoms despite broad-spectrum β-lactam therapy suggest possible resistant pathogens or complications (e.g., intracranial empyema).  3. Listeria monocytogenes rhombencephalitis (less likely, but important in differential)  Although less common in immunocompetent adults, Listeria should be considered in any case of brainstem or posterior fossa involvement, particularly with vomiting, cranial nerve palsy, head and neck rigidity, and subacute progression.  The lack of significant improvement with β-lactam/β-lactamase inhibitor therapy raises suspicion for Listeria, which is intrinsically resistant to cephalosporins and may not be adequately covered depending on local susceptibility patterns.  Recommended Immediate Investigations  Lumbar Puncture (emergent, unless contraindicated):  Opening pressure, CSF cell count/differential, glucose, protein  Gram stain, bacterial culture, latex agglutination for common bacterial antigens  CSF PCR panel (including Listeria, Streptococcus pneumoniae, Neisseria meningitidis, HSV, VZV, Enteroviruses, etc.)  Neuroimaging (prior to LP if signs of raised intracranial pressure):  MRI brain with contrast, ideally including DWI/FLAIR sequences to assess for meningeal enhancement, posterior fossa involvement, or complications (e.g., empyema, abscess)  Temporal bone CT to evaluate for otitis media, mastoiditis, or bony erosion  ENT evaluation:  Otoscopy and possible audiometry to assess for middle/inner ear infection  Blood cultures x2 sets before further antimicrobial therapy  Serum electrolytes repeat, including Mg²⁺ and PO₄³⁻ to assess for concurrent metabolic disturbances, particularly relevant with K⁺ = 2.6 mmol/L  Let me know when LP results or imaging come back — we can refine the diagnosis accordingly." | "Based on the cerebrospinal fluid (CSF) profile and metagenomic next-generation sequencing (mNGS) confirmation of _Streptococcus pneumoniae_, the diagnosis is acute purulent pneumococcal meningitis. This is a neurologic emergency requiring prompt and targeted antimicrobial therapy. The CSF profile shows:  - Very high WBC (7044/μL, 90% neutrophils)  - Very high protein (287.9 mg/dL), low glucose (1.65 mmol/L), and positive Pan's test  - Chloride mildly low  - CSF NGS: S. pneumoniae (sequence count 177) — consistent with bacterial load and high diagnostic confidence  Targeted Antimicrobial Therapy for Pneumococcal Meningitis  1. Primary Empirical/Definitive Antibiotic Regimen:  Ceftriaxone  - Dosage: 2 g IV q12h (total daily dose: 4 g/day)  - Rationale: High CNS penetration, time-dependent killing, good coverage of most S. pneumoniae, but must confirm MIC  AND  Vancomycin  - Dosage: 15–20 mg/kg IV q8–12h, target trough: 15–20 μg/mL  - Rationale: Coverage for penicillin- and cephalosporin-resistant pneumococcus, especially in areas with high resistance rates; synergistic with β-lactams  - Adjust for renal function and monitor serum levels  Once the isolate's ceftriaxone MIC is available:  - If MIC ≤ 0.5 µg/mL → vancomycin can be discontinued after 48–72h of defervescence and clinical improvement  - If MIC ≥ 1 µg/mL → continue vancomycin  2. Adjunctive Therapy  Dexamethasone  - Dosage: 10 mg IV q6h x 4 days  - Timing: Should be started prior to or with the first dose of antibiotics  - Rationale: Reduces risk of neurologic sequelae (e.g., hearing loss) by modulating inflammatory response in pneumococcal meningitis  - Can be discontinued if another pathogen is identified that does not benefit from steroids  Duration of Therapy  - 10–14 days total for S. pneumoniae meningitis, depending on clinical course, complications, and immune status  Additional Recommendations  - Repeat lumbar puncture may be considered at 48–72h if no clinical improvement  - Audiological follow-up: Due to reported hearing loss, refer for audiometry post-recovery  - Vaccination: Once stabilized, ensure patient receives Pneumococcal conjugate vaccine (PCV13/20) and PPSV23 if not previously immunized  Let me know if you'd like a tailored antimicrobial stewardship consult based on local resistance patterns or MICs when available." |
| Grok 3 | "Below is my expert advice on managing this female patient in her early 30s presenting with fever, cough, sputum for one week, and headache for two days, progressing to tinnitus, hearing loss, severe head and neck pain, movement disorders, and vomiting. Based on the clinical presentation and laboratory findings (WBC 34.5 × 10⁹/L, CRP 109 mg/L, PCT 49.63 ng/mL, K 2.6 mmol/L), and the lack of response to piperacillin-tazobactam, I have outlined the three most likely infectious diseases in order of probability, with reasoning and recommended next steps in examination.  Differential Diagnosis  1. Bacterial Meningitis  - Reasoning: The acute onset of fever, severe headache, neck stiffness (implied by head and neck movement disorders), and vomiting, combined with markedly elevated inflammatory markers (WBC 34.5 × 10⁹/L, CRP 109 mg/L, PCT 49.63 ng/mL), strongly suggests bacterial meningitis. The initial respiratory symptoms (fever, cough, sputum) may represent a prodromal illness or a predisposing focus (e.g., sinusitis or otitis media) for pathogens such as Streptococcus pneumoniae or Neisseria meningitidis, with the lack of response to piperacillin-tazobactam potentially indicating resistance or suboptimal CNS penetration. The presence of tinnitus and hearing loss further supports cranial nerve involvement, a known complication of bacterial meningitis.  - Next Step in Examination: Perform an urgent lumbar puncture for cerebrospinal fluid (CSF) analysis, including cell count, protein, glucose, Gram stain, bacterial culture, and multiplex PCR for common meningitis pathogens (S. pneumoniae, N. meningitidis, Haemophilus influenzae). Ensure imaging precedes the procedure if focal neurological signs or raised intracranial pressure are suspected.  2. Brain Abscess  - Reasoning: The progression to focal neurological symptoms (tinnitus, hearing loss in the right ear, severe headache) and the lack of improvement with broad-spectrum antibiotics raise the possibility of a brain abscess, potentially secondary to a prior respiratory infection (e.g., sinusitis or occult otitis media). Elevated inflammatory markers and the subacute timeline (initial symptoms resolving before neurological deterioration) align with this diagnosis, which often requires both antimicrobial therapy and surgical intervention. Hearing loss and tinnitus suggest possible proximity to the temporal lobe or auditory structures.  - Next Step in Examination: Obtain an urgent contrast-enhanced CT or MRI of the brain to identify an intracranial mass lesion, assess for complications (e.g., edema, hydrocephalus), and guide further management. This should be prioritized, especially given the focal neurological deficits.  3. Viral Encephalitis  - Reasoning: Although less likely given the significantly elevated procalcitonin (PCT 49.63 ng/mL), which is more specific for bacterial infections, viral encephalitis (e.g., herpes simplex virus [HSV]) remains a differential due to the headache, fever, and neurological symptoms, including hearing loss, which can occur with HSV affecting the temporal lobes. The initial viral-like illness (fever, cough, sputum resolving spontaneously) could have been a precursor, with the lack of antibiotic response supporting a non-bacterial etiology. However, the inflammatory profile leans more toward a bacterial process.  - Next Step in Examination: If bacterial meningitis is excluded or clinical suspicion persists, include CSF PCR for viral pathogens (e.g., HSV-1/2, enteroviruses) in the lumbar puncture workup, and consider an electroencephalogram (EEG) to evaluate for encephalitic changes, though this is secondary to initial diagnostics.  Recommended Next Steps in Examination  - Lumbar Puncture: Essential for confirming meningitis, with CSF analysis to include cell count, differential, protein, glucose, Gram stain, culture, and PCR for bacterial and viral pathogens. Contraindications (e.g., raised intracranial pressure) must be ruled out first.  - Neuroimaging: Urgent CT or MRI of the brain (preferably with contrast) to exclude brain abscess, assess for mass effect, or identify other intracranial pathology prior to lumbar puncture if focal signs or altered consciousness are present.  - Blood Cultures: Obtain if not already performed, to detect bacteremia and guide pathogen identification, given the systemic inflammatory response.  These steps will provide critical diagnostic clarity and inform subsequent management, leveraging the most robust and current evidence-based approaches in infectious diseases. Please ensure timely execution given the patient’s deteriorating condition.  _Disclaimer: Grok is not a doctor; please consult one. Don't share information that can identify you._" | "Below is the recommended antibiotic treatment plan for your patient with bacterial meningitis caused by Streptococcus pneumoniae, based on the provided cerebrospinal fluid (CSF) examination and next-generation sequencing (NGS) results. This includes the drug choice, dosage, and duration of therapy.  Diagnosis  Your patient has bacterial meningitis caused by Streptococcus pneumoniae, confirmed by:  - CSF Examination:  - Positive Pandy's test (indicating elevated protein).  - Nucleated cells: 7044/μL (markedly elevated, indicating infection).  - Neutrophils: 90% (consistent with bacterial meningitis).  - Protein: 287.9 mg/dL (elevated, typical in bacterial meningitis).  - Glucose: 1.65 mmol/L (decreased, a hallmark of bacterial meningitis).  - Chloride: 116.4 mmol/L (normal).  - CSF NGS: Detection of Streptococcus pneumoniae with a sequence number of 177, confirming the causative organism.  Antibiotic Treatment Plan  1. Drug Choice  The best initial antibiotic treatment for S. pneumoniae meningitis is a combination of:  - Ceftriaxone: A third-generation cephalosporin with excellent penetration into the central nervous system (CNS), effective against most S. pneumoniae strains.  - Vancomycin: Added to cover potential penicillin- or cephalosporin-resistant strains until antibiotic susceptibility results are available.  Note: Once susceptibility testing confirms the strain’s sensitivity (e.g., to penicillin or ceftriaxone), vancomycin can be discontinued, and therapy can be narrowed to a single agent (e.g., ceftriaxone alone). However, without susceptibility data yet, the combination is the safest and most effective starting point.  2. Dosage  - Ceftriaxone: 2 grams intravenously (IV) every 12 hours.  - Vancomycin: 15-20 mg/kg IV every 8-12 hours, adjusted based on:  - Renal function (to avoid toxicity).  - Serum trough levels (target: 15-20 mg/L for meningitis, ensuring adequate CNS penetration).  3. Length of Antibiotic Use  - Duration: 10-14 days is the standard treatment length for S. pneumoniae meningitis.  - Adjustment: The exact duration should be guided by:  - Clinical improvement (e.g., resolution of fever, neurological symptoms).  - Follow-up CSF analysis (if performed) to confirm the infection is clearing.  - Absence of complications (e.g., brain abscess).  4. Adjunctive Therapy (Recommended)  - Dexamethasone: Used to reduce inflammation and improve outcomes, particularly in S. pneumoniae meningitis.  - Dosage: 0.15 mg/kg IV every 6 hours for 2-4 days.  - Timing: Start before or with the first dose of antibiotics for maximum benefit.  Why This Treatment?  - Combination Therapy: S. pneumoniae can sometimes be resistant to penicillin or cephalosporins. Ceftriaxone plus vancomycin ensures coverage of resistant strains until susceptibility is known, reducing the risk of treatment failure in this life-threatening condition.  - Dosage: These doses are specifically tailored for meningitis to achieve high concentrations in the CSF, which standard doses may not accomplish.  - Duration: 10-14 days is evidence-based for S. pneumoniae meningitis, balancing effective eradication with minimizing unnecessary antibiotic exposure.  - Dexamethasone: Studies show it reduces neurological complications (e.g., hearing loss) and mortality in S. pneumoniae meningitis when given early.  Next Steps  - Susceptibility Testing: Await results to confirm if the S. pneumoniae strain is sensitive to ceftriaxone or penicillin. If sensitive, you can stop vancomycin and continue ceftriaxone alone.  - Monitoring:  - Check vancomycin trough levels to adjust dosing.  - Monitor the patient’s neurological status, fever, and overall clinical progress daily.  - Consider repeat CSF analysis if the patient doesn’t improve as expected (e.g., persistent fever or worsening symptoms after 48-72 hours).  - Supportive Care: Manage hydration, electrolytes, and potential complications like seizures or increased intracranial pressure.  Summary of Treatment  - Antibiotics:  - Ceftriaxone: 2 grams IV every 12 hours.  - Vancomycin: 15-20 mg/kg IV every 8-12 hours (adjust per levels and renal function).  - Duration: 10-14 days, based on clinical response.  - Adjunctive Therapy: Dexamethasone 0.15 mg/kg IV every 6 hours for 2-4 days, starting with or before antibiotics.  This plan provides the best chance for a full recovery while addressing the seriousness of S. pneumoniae meningitis. Let me know if you need further clarification!  _Disclaimer: Grok is not a doctor; please consult one. Don't share information that can identify you._" |
| Gemini 2.5 Flash | "Based on the patient's clinical history and laboratory findings, the progression from a seemingly benign upper respiratory tract illness to a severe neurological syndrome with profound systemic inflammation represents a life-threatening infectious process. The constellation of high-grade fever, severe headache, neck pain/movement disorders, and focal neurological signs (tinnitus, hearing loss) is highly alarming. The extremely elevated WBC and procalcitonin levels are strongly predictive of a severe bacterial infection.  Differential Diagnosis  1. Acute Bacterial Meningitis: This is the most urgent and likely diagnosis. The patient's symptoms of fever, severe headache, and neck stiffness/movement disorders constitute the classic triad of bacterial meningitis. The preceding upper respiratory illness is a common predisposing factor, allowing for hematogenous or contiguous spread of pathogens to the meninges. The profound inflammatory response, particularly the high procalcitonin, is highly indicative of a bacterial rather than a viral etiology.  2. Brain Abscess: This is a strong consideration. A brain abscess can result from contiguous spread from a primary parameningeal focus, such as otitis media or sinusitis, or from hematogenous seeding. The patient's severe headache, focal neurological deficits (e.g., right-sided hearing loss), and severe systemic signs are highly consistent with this diagnosis. While symptoms may evolve more subacutely, the rapid deterioration suggests an aggressive pathogen or a rupture of the abscess.  3. Septic Cavernous Sinus Thrombosis: This is a plausible, albeit less common, differential. It represents a serious complication of a primary infection of the middle ear or sinuses that spreads to the cavernous sinus, leading to septic thrombosis. The patient's severe headache and systemic inflammatory response are consistent. Although the classic orbital findings are not mentioned, the involvement of cranial nerves (e.g., related to hearing loss) and the severe head pain make this a crucial diagnosis to consider.  Proposed Next Steps in Examination  1. Neuroimaging:  Immediate Brain MRI with Contrast: This is the most critical next step. An MRI with contrast is superior to CT for visualizing subtle inflammatory changes in the meninges, as well as detecting a brain abscess or a septic thrombosis of the cavernous or other cerebral venous sinuses. This should be performed urgently to rule out a space-occupying lesion or increased intracranial pressure prior to a lumbar puncture.  2. Cerebrospinal Fluid (CSF) Analysis:  Urgent Lumbar Puncture (LP): Following the neuroimaging (and if no contraindications are identified), a lumbar puncture is mandatory. CSF should be sent for:  Cell count and differential: To determine pleocytosis and the predominant cell type (e.g., neutrophils in bacterial meningitis).  Glucose and protein levels: To assess for the characteristic changes seen in bacterial meningitis (low glucose, high protein).  Gram stain, bacterial culture, and PCR: To rapidly identify the causative bacterial pathogen.  3. Microbiological Studies:  Blood Cultures: At least two sets of blood cultures should be drawn immediately to identify the systemic pathogen, as positive blood cultures are common in bacterial meningitis and may provide the only clue to the pathogen if CSF cultures are negative due to prior antibiotic administration.  4. Specialist Consultation:  Otolaryngology (ENT) Consultation: An ENT specialist should be consulted for a detailed examination of the patient's ears and sinuses to identify a primary source of infection that may require surgical drainage (e.g., mastoiditis, complicated sinusitis).  Neurology Consultation: A neurologist should also be consulted for evaluation of the patient's head and neck movement disorders and other neurological signs." | Based on the cerebrospinal fluid (CSF) analysis and next-generation sequencing (NGS) results, the diagnosis of acute bacterial meningitis caused by Streptococcus pneumoniae is definitively confirmed. The CSF profile—high cell count with neutrophil predominance, elevated protein, and low glucose—is a classic presentation of a pyogenic meningitis. The identification of Streptococcus pneumoniae sequences solidifies the diagnosis and directs therapy. Best Antibiotic Treatment Plan Pneumococcal meningitis is a medical emergency requiring prompt, aggressive, and highly effective antimicrobial therapy with excellent CNS penetration. The initial regimen should be chosen to cover for potential cephalosporin-resistant strains, a common concern with S. pneumoniae.  Drug Choice: The standard of care is a combination of a third-generation cephalosporin and vancomycin.  1. Ceftriaxone: This is the cornerstone of therapy due to its excellent CSF penetration and potent activity against most pneumococcal strains.  2. Vancomycin: This is a crucial addition to the initial empiric therapy to provide coverage against potential cephalosporin-resistant S. pneumoniae until susceptibility data from a definitive culture are available.  3. Dexamethasone: This is a critical adjunctive therapy. Dexamethasone has been shown to reduce mortality and neurological sequelae in adult patients with pneumococcal meningitis, likely by reducing inflammation in the subarachnoid space.  Dosage:  1. Ceftriaxone: 2 g IV every 12 hours. This high-dose regimen is required to achieve adequate bactericidal concentrations in the inflamed meninges.  2. Vancomycin: A loading dose of 15 to 20 mg/kg IV followed by a maintenance dose of 15 mg/kg IV every 8 to 12 hours. Vancomycin dosing should be guided by therapeutic drug monitoring (TDM) to maintain serum trough levels of 15 to 20 µg/mL and must be adjusted for renal function.  3. Dexamethasone: 10 mg IV every 6 hours for 2 to 4 days. The first dose should be administered just before or with the first dose of antibiotics.  Length of Use: The total duration of antibiotic therapy for pneumococcal meningitis is typically 10 to 14 days.  The vancomycin and dexamethasone can be discontinued if a CSF or blood culture isolate of S. pneumoniae is confirmed to be susceptible to penicillin (MIC 0.06 ug/mL) or a third-generation cephalosporin (e.g., Ceftriaxone MIC 0.5 ug/mL).  The total duration is counted from the first day of sustained clinical improvement and resolution of fever. Close monitoring of the patient's neurological status and inflammatory markers is essential to guide the length of therapy. |  |

## Supplementary Table 6. Clinical characteristics and LLM responses of Case 6

| Medical history summary | A male in his mid 70s was admitted to the hospital due to "fever with back pain for more than a month". The patient had a fever for more than a month, with a highest temperature of 39.3 ℃, accompanied by back and waist pain. The pain was obvious during movement, and in the past 2 days, the patient had bilateral rib pain, chest tightness, palpitations, and no cough or sputum. Blood routine: white blood cell count 10.7 × 10 ^ 9/L whole blood CRP 245.0mg/L interleukin-6 (IL-6) 191.70pg/mL, lung CT showed no significant abnormalities | |
| --- | --- | --- |
| Laboratory and imaging findings | [Enhanced thoracic MRI scan]: Bone destruction with soft tissue mass in thoracic vertebrae 11-12, and endplate inflammation in thoracic vertebrae 9/10; Spinal [lumbar magnetic resonance enhanced scan]: lumbar 3/4, lumbar 4/5, and lumbar 5/sacral 1 intervertebral disc herniation; Lumbar 4/5, L5/S1 vertebral endplate inflammation. NGS of soft tissue near thoracic vertebrae 11-12: Mycobacterium tuberculosis (sequence number 1591), Escherichia coli (sequence number 13721), resistance gene tet (E). | |
| Answers | Preliminary Diagnosis and Investigations Strategy | Treatment Strategy |
| DeepSeek-R1 | "Diagnostic Considerations (Order of Likelihood):  1. Salmonella-associated mycotic aortic aneurysm  Rationale:  The patient’s prolonged fever, marked systemic inflammation (CRP >200 mg/L, IL-6 >190 pg/mL), and axial skeletal pain (back/ribs) align with Salmonella-related vascular infection. Elderly patients with atherosclerosis are predisposed to Salmonella seeding of atheromatous plaques, leading to mycotic aneurysms. The absence of cough/sputum and normal lung CT redirects focus to extrapulmonary sites. Blood cultures growing Salmonella enteritidis (as in the cited case) would confirm this, though cultures may intermittently be negative with prior antibiotic exposure. Back pain progression and rib involvement suggest possible aortic arch/descending aortic pathology.  2. Vertebral osteomyelitis/discitis (bacterial etiology)  Rationale:  Persistent fever, axial pain exacerbated by movement, and elevated inflammatory markers are classic for spinal infection. Staphylococcus aureus or Enterobacteriaceae (including Salmonella) are common pathogens. Rib pain may reflect paravertebral abscess extension or reactive inflammation. Though initial imaging (CT) was unremarkable, MRI spine with contrast is superior for detecting early osteomyelitis/epidural abscesses.  3. Occult abscess (e.g., psoas, retroperitoneal)  Rationale:  Subacute fever with axial pain and systemic inflammation raises suspicion for deep-seated abscesses. Psoas abscesses often manifest as back/hip pain and may arise from hematogenous spread (e.g., Staphylococcus) or contiguous infection (e.g., diverticulitis). Negative lung CT does not exclude subdiaphragmatic or pelvic collections.  Next Diagnostic Plan:  Blood cultures (aerobic/anaerobic) ×3 sets prior to antibiotics to identify bacteremia (e.g., Salmonella, S. aureus).  Contrast-enhanced CT angiography of thoracoabdominal aorta to evaluate for mycotic aneurysm, aortic ulceration, or periaortic fluid.  MRI spine (whole spine with contrast) to assess for osteomyelitis, discitis, or epidural abscess.  Transesophageal echocardiography (TEE) to rule out aortic valve endocarditis, which may coexist with mycotic aneurysms.  Nuclear imaging (FDG-PET/CT or labeled WBC scan) if initial CT/MRI is nondiagnostic to localize occult infection.  Serologic testing for atypical pathogens (e.g., Bartonella, Coxiella) if blood cultures remain negative.  Rationale for Prioritization:  The combination of vascular and spinal pathology is critical to exclude in elderly patients with subacute fever and axial pain. Mycotic aneurysms require urgent intervention to prevent rupture, while untreated osteomyelitis risks neurological compromise. Cross-sectional imaging (CT/MRI) and TEE are cornerstone modalities for these diagnoses." | "Based on the complex infection profile (mixed Mycobacterium tuberculosis and Escherichia coli infection with drug resistance genes), the treatment regimen must address both tuberculosis treatment and combat drug-resistant E. coli. Below is a tiered recommendation based on the latest research and clinical guidelines:  I. Anti-Tuberculosis Treatment Regimen  Basis for Diagnosis: NGS detection of Mycobacterium tuberculosis (sequence count: 1591) + vertebral bone destruction (consistent with spinal tuberculosis/Pott's disease)  Intensive Phase (2–3 months):  - Isoniazid (INH): 5 mg/kg/day (typically 300 mg/day, oral) + Rifampicin (RIF): 10 mg/kg/day (typically 600 mg/day, oral)  - Pyrazinamide (PZA): 25–30 mg/kg/day (typically 1500–2000 mg/day, oral) + Ethambutol (EMB): 15–20 mg/kg/day (typically 1200 mg/day, oral)  Note: For spinal tuberculosis, it is recommended to extend the intensive phase to 2–3 months to ensure drug penetration into bone tissue.  Continuation Phase (at least 9–12 months):  - Discontinue PZA and EMB; continue INH + RIF until the total treatment duration reaches 9–12 months.  Basis: WHO guidelines recommend a minimum treatment duration of 9 months for bone and joint tuberculosis, with complex cases requiring extension to 12 months.  II. E. coli Infection Treatment Regimen  Drug Resistance Gene Indication: tet(E) gene → intrinsic resistance to tetracyclines (e.g., doxycycline, minocycline); avoid use.  Recommended Regimen (based on resistance genes and bone tissue penetration):  First-Line:  - Fluoroquinolones (e.g., ciprofloxacin 400 mg IV q12h or levofloxacin 750 mg IV q24h)  Basis: High concentration in bone tissue, and tet(E) does not directly affect susceptibility to this class.  Note: Rifampicin may reduce fluoroquinolone plasma concentrations; monitor efficacy or adjust dosage.  Alternative Regimen (e.g., in case of fluoroquinolone resistance):  - Carbapenems (e.g., meropenem 1 g IV q8h or ertapenem 1 g IV q24h)  Basis: Effective against ESBL- or AmpC-producing strains; moderate bone penetration.  Combination Therapy (for severe infections):  - Ceftriaxone 2 g IV q24h + Gentamicin 5 mg/kg IV q24h  Basis: Synergistic effect enhances bactericidal activity, particularly suitable for concurrent spinal abscess.  III. Key Considerations  Drug Susceptibility Verification:  - Perform phenotypic drug susceptibility testing on the isolated E. coli to clarify resistance beyond tet(E) (e.g., ESBL, fluoroquinolone resistance genes).  Drug Interactions:  - Rifampicin is a strong CYP3A4 inducer and may reduce ciprofloxacin concentrations (monitor or switch to moxifloxacin).  Treatment Duration Recommendations:  - E. coli spinal infection: IV antibiotics for 4–6 weeks, adjusted based on imaging/symptoms.  - Tuberculosis treatment: Continue for at least 9–12 months, with regular MRI follow-ups to assess bone repair.  Hepatic and Renal Monitoring:  - Monthly monitoring of liver enzymes (INH/RIF/PZA are hepatotoxic) and renal function (aminoglycosides are nephrotoxic).  IV. Supportive Measures  - Surgical Consultation: Vertebral bone destruction with soft tissue mass may require debridement or fixation.  - Nutritional Support: High-protein diet to address catabolic state (tuberculosis infection often leads to malnutrition).  - Pain Management: NSAIDs or short-term low-dose corticosteroids to control inflammatory pain (administer separately from anti-tuberculosis drugs).  V. Reference Basis  - tet(E) gene and tetracycline resistance mechanisms.  - Treatment duration for spinal tuberculosis.  - Use of fluoroquinolones in bone infections.  It is recommended to implement personalized treatment under the joint management of infectious disease and orthopedic departments, with dynamic adjustment of the regimen." |
| ChatGPT-5 | "Based on the patient's prolonged febrile syndrome, musculoskeletal pain (particularly axial skeleton), elevated systemic inflammatory markers (CRP, IL-6), and absence of pulmonary parenchymal involvement on imaging, the differential should prioritize deep-seated infectious processes involving the vertebral column and adjacent structures. The three most probable diagnoses, in descending order of likelihood, are as follows:  1. Vertebral Osteomyelitis/Discitis with Possible Epidural or Paravertebral Extension  Rationale:  Chronic fever associated with progressive back pain, particularly pain exacerbated by movement, is highly suggestive of vertebral osteomyelitis, with or without contiguous discitis or epidural extension. The elevated CRP and IL-6 further support a deep-seated bacterial infection. Elderly patients are particularly vulnerable to hematogenous vertebral seeding, especially in the presence of predisposing conditions such as diabetes, urologic procedures, or vascular access.  2. Infective Endocarditis (IE) with Musculoskeletal Metastatic Seeding  Rationale:  The constitutional symptoms, back pain, and recent-onset chest tightness and palpitations, along with high systemic inflammation, raise suspicion for infective endocarditis with septic embolization or metastatic infection to the spine or ribs. The absence of respiratory symptoms and the presence of rib pain may reflect costovertebral or costochondral spread from bacteremia, a well-recognized complication of IE in elderly males.  3. Tuberculous Spondylitis (Pott’s Disease)  Rationale:  The chronicity of symptoms (>1 month), axial skeletal pain, and lack of significant findings on lung CT do not rule out extrapulmonary tuberculosis, especially in older adults. While the acute-phase reactants are markedly elevated (more typical of pyogenic infection), a subacute tuberculous spondylodiscitis should be considered, particularly in TB-endemic settings or if there is relevant history (e.g., previous TB, immunosuppression).  Recommended Next Diagnostic Workup  1. Spinal MRI with Gadolinium  - Assess for vertebral body and disc space involvement  - Evaluate for paravertebral abscesses or epidural phlegmon  - Mandatory in all patients with fever and back pain >2 weeks  2. Transthoracic Echocardiography (TTE) → escalate to TEE if suspicion for IE persists  - Evaluate for valvular vegetations or structural lesions  - Consider if murmur is present or history suggests bacteremia  3. Blood cultures (x3 sets) prior to antimicrobial therapy  - Crucial for identifying S. aureus, Enterococcus, or Streptococcus spp.  - Consider fungal and mycobacterial cultures if initial results are negative  4. Interferon-gamma release assay (IGRA) and tuberculin skin test (TST)  - Evaluate for latent or active TB  - Consider spinal biopsy if MRI suggests TB but microbiology remains inconclusive  5. Serum procalcitonin, ESR, autoimmune markers (ANA, RF)  - To help distinguish between infectious and non-infectious causes  - ESR often elevated in both pyogenic and tuberculous vertebral osteomyelitis  6. Consider FDG-PET/CT if MRI is contraindicated or negative but clinical suspicion remains high.  Would you like a structured diagnostic algorithm or clinical documentation template for vertebral osteomyelitis workup?" | "Thank you. The diagnostic picture now clearly indicates a polymicrobial vertebral osteomyelitis involving:  - Thoracic vertebrae (T11–T12) with soft tissue extension  - Confirmed Mycobacterium tuberculosis and Escherichia coli from deep tissue NGS  - Evidence of vertebral endplate inflammation and degeneration at multiple levels (T9–T12, L4–S1)  This case represents a rare but clinically significant mixed tuberculous-pyogenic vertebral osteomyelitis, possibly secondary to hematogenous dissemination, with E. coli likely reflecting superinfection or dual infection.  Microbial Summary  - Mycobacterium tuberculosis complex: confirmed by high sequence reads in deep tissue  - Escherichia coli: high sequence burden with identified tet(E) gene (tetracycline resistance)  - No resistance to β-lactams or quinolones reported; assume E. coli is a typical gut-derived strain unless otherwise shown  Recommended Antimicrobial Regimen  1. Antituberculous Therapy (ATT) – WHO Standard Regimen  Initial intensive phase (2 months):  - Rifampicin (RIF): 10 mg/kg/day (typically 600 mg PO daily)  - Isoniazid (INH): 5 mg/kg/day (typically 300 mg PO daily)  - Pyrazinamide (PZA): 20–25 mg/kg/day (1500–2000 mg PO daily depending on weight)  - Ethambutol (EMB): 15–20 mg/kg/day (typically 800–1200 mg PO daily)  Continuation phase (4–7 months):  - RIF + INH for at least 10–12 months total in skeletal TB  - Duration may extend to 12 months in the presence of spinal instability, soft tissue abscess, or neurological involvement  2. Antibacterial Therapy for E. coli  Given vertebral involvement with E. coli, treat as deep-seated pyogenic osteomyelitis:  Empiric Option (based on susceptibility):  - Ceftriaxone 2 g IV q24h × 6 weeks  OR  - Cefepime 2 g IV q12h (broader gram-negative coverage, if concern for resistance)  > Adjust based on culture data if further sensitivities become available.  Combined Regimen Considerations  - Initial phase (first 6–8 weeks):  - Full 4-drug ATT  - Plus ceftriaxone (or other beta-lactam) for 6 weeks  - After 6–8 weeks:  - Discontinue ceftriaxone once E. coli infection is cleared (based on clinical and inflammatory marker improvement)  - Continue ATT for a total of 12 months, adjusting as needed based on follow-up MRI and clinical response  Monitoring and Follow-Up  - Repeat inflammatory markers (CRP, ESR) weekly initially, then monthly  - Serial MRI at 3-month intervals or as clinically indicated  - Visual acuity testing + color vision monitoring (for ethambutol)  - Baseline and monthly LFTs (rifampicin, isoniazid, pyrazinamide toxicity)  - Supplement pyridoxine 25–50 mg daily to prevent INH-induced neuropathy  Would you like a printable summary for ward documentation or an integrated treatment flowchart?" |
| Grok 3 | "As an infectious disease specialist, I have evaluated the case of this male patient in his mid 70s presenting with a prolonged fever (>1 month, Tmax 39.3°C), back pain exacerbated by movement, recent bilateral rib pain, chest tightness, palpitations, and elevated inflammatory markers (WBC 10.7 × 10⁹/L, CRP 245.0 mg/L, IL-6 191.70 pg/mL), with no respiratory symptoms and a normal lung CT. Below, I outline the three most likely infectious disease diagnoses, ranked in order of probability, with supporting rationale and recommended next steps in examination based on current scientific evidence.  Diagnoses in Order of Likelihood  1. Spinal Osteomyelitis  - Rationale: Spinal osteomyelitis is the primary consideration given the patient’s advanced age, chronic fever, and significant back pain worsened by movement, alongside markedly elevated inflammatory markers (CRP 245.0 mg/L, IL-6 191.70 pg/mL). The recent onset of bilateral rib pain may reflect local extension of infection or referred pain, while the absence of respiratory symptoms and normal lung CT argue against pulmonary etiologies, reinforcing a musculoskeletal focus.  - Evidence: Elderly patients are predisposed to vertebral osteomyelitis, often from hematogenous spread, with prolonged fever and elevated CRP being hallmark feature.  2. Infective Endocarditis  - Rationale: Infective endocarditis is the second most likely diagnosis due to the prolonged fever, systemic symptoms (chest tightness, palpitations), and elevated inflammatory markers in an elderly patient. While classic signs (e.g., murmur, embolic phenomena) are not reported, atypical presentations are common in older adults, and the normal lung CT excludes pneumonia as a primary cause.  - Evidence: The Duke criteria emphasize fever and systemic inflammation as key diagnostic clues, with elderly patients often lacking overt cardiac findings.  3. Tuberculosis (TB) – Extrapulmonary (Spinal)  - Rationale: Spinal TB (Pott’s disease) is a plausible third diagnosis, given the chronic fever, back pain, and elevated inflammatory markers, which align with extrapulmonary TB manifestations. The lack of cough or sputum does not exclude TB, as spinal involvement can occur without pulmonary symptoms, particularly in older or immunocompromised individuals.  - Evidence: Extrapulmonary TB accounts for ~20% of TB cases, with spinal TB presenting insidiously with fever and pain.  Next Steps in Examination  To differentiate these diagnoses and guide management, I recommend the following investigations, grounded in evidence-based practice:  - Spinal MRI: Magnetic resonance imaging of the spine is the gold standard for diagnosing spinal osteomyelitis and TB, with sensitivity >90% for detecting vertebral inflammation, discitis, or abscesses. It will distinguish between pyogenic infection and tuberculous spondylitis based on patterns like paraspinal involvement or vertebral collapse.  - Echocardiography: Transthoracic echocardiography (TTE) is indicated to evaluate for infective endocarditis, assessing for vegetations or valvular dysfunction (sensitivity ~70%; specificity >90%). If TTE is negative and suspicion persists, transesophageal echocardiography (TEE) should follow due to its superior resolution.  - TB Testing: Perform an interferon-gamma release assay (IGRA, e.g., QuantiFERON-TB Gold) and sputum culture for acid-fast bacilli (AFB), supplemented by PCR if available, to exclude TB. IGRA offers high specificity (>95%) for latent or active TB, while PCR enhances rapid detection in extrapulmonary cases.  These diagnostic steps will provide critical clarity, enabling precise differentiation among spinal osteomyelitis, infective endocarditis, and spinal TB. Please proceed with these examinations and consider regional epidemiology (e.g., TB prevalence) in your final assessment.  Disclaimer: This advice is provided by Grok, an AI assistant, and is not a substitute for clinical judgment by a licensed physician." | "Based on the provided medical data, you are dealing with a complex infection involving Mycobacterium tuberculosis (TB) and Escherichia coli (E. coli), affecting the thoracic and lumbar spine. The MRI scans show bone destruction, a soft tissue mass, and endplate inflammation, suggesting spinal osteomyelitis or discitis complicated by these pathogens. Next-Generation Sequencing (NGS) confirms TB (sequence number 1591) and E. coli (sequence number 13721), with the resistance gene tet(E) indicating tetracycline resistance in E. coli. Below is the recommended antibiotic treatment, including drug choice, dosage, and duration, tailored to address both infections effectively.  Understanding the Infections  1. Mycobacterium tuberculosis (TB)  - TB is a slow-growing bacterium that commonly affects the lungs but can spread to the spine, causing Pott’s disease (spinal TB). This leads to bone destruction, soft tissue masses (e.g., abscesses), and inflammation, as seen in your thoracic vertebrae (T11-T12, T9/T10).  - Standard treatment involves a combination of multiple antibiotics for an extended period due to TB’s slow growth and the severity of spinal involvement.  2. Escherichia coli (E. coli)  - E. coli is a gram-negative bacterium that can cause spinal infections like osteomyelitis or discitis, as evidenced by the lumbar endplate inflammation (L4/L5, L5/S1).  - The tet(E) gene indicates resistance to tetracyclines (e.g., doxycycline), so alternative antibiotics effective against gram-negative bacteria are required.  Recommended Antibiotic Treatment  The treatment must target both TB and E. coli simultaneously, considering the spinal involvement and resistance profile. Below is the regimen:  For Mycobacterium tuberculosis (TB)  - Standard First-Line Regimen:  Since no TB resistance data is provided, we assume drug-sensitive TB unless further testing (e.g., GeneXpert for rifampicin resistance) suggests otherwise. The regimen includes four drugs initially, followed by two drugs in the continuation phase.  - Drugs and Dosages:  - Isoniazid (INH): 5 mg/kg/day (max 300 mg/day) – e.g., 300 mg daily for a 60 kg adult.  - Rifampicin (RIF): 10 mg/kg/day (max 600 mg/day) – e.g., 600 mg daily for a 60 kg adult.  - Pyrazinamide (PZA): 20-25 mg/kg/day (max 2 g/day) – e.g., 1.5-2 g daily depending on weight.  - Ethambutol (EMB): 15-20 mg/kg/day (max 1.6 g/day) – e.g., 800-1200 mg daily depending on weight.  - Duration:  - Initial Phase: 2 months with INH, RIF, PZA, and EMB.  - Continuation Phase: 7 months with INH and RIF.  - Total: 9 months.  - Note: Spinal TB often requires 9-12 months due to extensive bone destruction and soft tissue involvement; 9 months is recommended here as a minimum, with possible extension based on clinical response.  For Escherichia coli (E. coli)  - Drug Choice:  - Ceftriaxone: A third-generation cephalosporin with excellent activity against E. coli and good bone penetration, ideal for spinal infections.  - The tet(E) gene affects tetracyclines, not cephalosporins, making ceftriaxone a suitable choice.  - Alternative: If E. coli is resistant to cephalosporins (e.g., extended-spectrum beta-lactamase [ESBL] producer), switch to meropenem (a carbapenem).  - Dosage:  - Ceftriaxone: 2 grams IV once daily.  - Meropenem (if needed): 1 gram IV every 8 hours.  - Duration:  - 6 weeks of IV therapy is standard for spinal osteomyelitis.  - After 6 weeks, if clinically improving, oral step-down therapy (e.g., ciprofloxacin or levofloxacin) may be considered based on culture sensitivity, though this depends on further testing not provided here.  Combined Treatment Plan  - First 6 Weeks:  - TB: INH (300 mg/day), RIF (600 mg/day), PZA (1.5-2 g/day), EMB (800-1200 mg/day).  - E. coli: Ceftriaxone (2 grams IV daily).  - Weeks 7-8 (Months 2):  - TB: Continue INH, RIF, PZA, EMB (complete the 2-month initial phase).  - E. coli: Ceftriaxone stops after 6 weeks unless extended based on clinical or imaging findings.  - Months 3-9:  - TB: INH (300 mg/day) and RIF (600 mg/day) for 7 months (continuation phase).  - E. coli: No further antibiotics unless persistent infection is evident.  - Total Duration: 9 months, covering TB fully, with the first 6 weeks also treating E. coli.  Monitoring and Adjustments  - Liver Function Tests (LFTs): Monthly monitoring due to hepatotoxicity risk from INH, RIF, and PZA.  - Renal Function: Assess baseline and periodically, especially if switching to meropenem or adding aminoglycosides (e.g., amikacin) for resistant E. coli.  - Clinical Response: Monitor for pain reduction, neurological improvement, and fever resolution.  - Imaging: Follow-up MRI after 2-3 months to assess bone and soft tissue healing.  - Resistance Testing: If E. coli shows cephalosporin resistance or TB shows rifampicin resistance (via GeneXpert), adjust the regimen accordingly (e.g., meropenem for E. coli, second-line TB drugs like levofloxacin or bedaquiline).  Final Recommendation  - For TB:  - Isoniazid: 300 mg/day  - Rifampicin: 600 mg/day  - Pyrazinamide: 1.5-2 g/day (weight-based)  - Ethambutol: 800-1200 mg/day (weight-based)  - Duration: 2 months (all four drugs), then 7 months (INH + RIF), totaling 9 months.  - For E. coli:  - Ceftriaxone: 2 grams IV daily for 6 weeks.  - Alternative (if resistant): Meropenem 1 gram IV every 8 hours for 6 weeks.  This regimen effectively targets both pathogens, accounts for the tet(E) resistance in E. coli, and addresses the severity of spinal involvement. Adjustments may be needed based on your weight, renal function, or additional resistance data. Consult your healthcare provider for personalized care.  Disclaimer: This advice is provided by Grok, an AI assistant, and is not a substitute for clinical judgment by a licensed physician." |
| Gemini 2.5 Flash | "Based on the patient's clinical presentation of a prolonged fever and chronic back pain, coupled with a significant systemic inflammatory response, the most likely diagnosis is a deep-seated axial skeletal infection. The duration and location of the pain are highly specific indicators, guiding the differential diagnosis towards a focal osteoarticular process.  Differential Diagnosis  1. Infectious Spondylodiscitis: This is the most probable diagnosis. The classic combination of fever and progressive, movement-exacerbated back pain strongly suggests an infection of the intervertebral disc and adjacent vertebral bodies. The elevated white blood cell count and markedly high levels of C-reactive protein (CRP) and interleukin-6 (IL-6) are robust markers of a severe infectious process, confirming a systemic inflammatory response to the localized bone and disc infection.  2. Spinal Tuberculosis (Pott's Disease): This is a critical consideration, especially in a case with a subacute or chronic presentation. Unlike acute pyogenic spondylodiscitis, tuberculosis of the spine often presents with a more indolent course, which fits the patient’s history of "fever for more than a month." The high inflammatory markers are also consistent with active mycobacterial infection, and it must be distinguished from a pyogenic etiology due to the vastly different treatment requirements.  3. Vertebral Osteomyelitis with Psoas Abscess: This diagnosis encompasses the patient's symptoms and represents a common complication of a more severe vertebral infection. The patient's back and waist pain is the primary sign of vertebral osteomyelitis, and the pain can be a direct result of an adjacent abscess, such as a psoas abscess. The new-onset rib pain and chest tightness could be from a contiguous infection or referred pain from a thoracic abscess.  Proposed Next Steps in Examination  1. Advanced Imaging:  Spine MRI with Gadolinium Contrast: This is the definitive diagnostic tool. It will precisely identify and characterize the extent of the infection, differentiate between infectious and non-infectious etiologies, and detect complications such as epidural, paraspinal, or psoas abscesses that require immediate drainage.  2. Microbiological Diagnosis:  Blood Cultures: Obtain at least two sets of blood cultures from different sites. While the yield may be low in chronic cases, a positive result would provide a rapid and definitive microbiological diagnosis, circumventing the need for more invasive procedures.  Image-Guided Biopsy: If blood cultures are negative, a percutaneous image-guided biopsy (CT or fluoroscopy guided) of the affected vertebral body and disc space is mandatory. The specimen should be submitted for Gram stain, aerobic and anaerobic bacterial cultures, as well as mycobacterial (AFB) and fungal cultures to identify the causative organism.  3. Adjunctive Diagnostic Testing:  Tuberculosis Screening: Perform a T-cell-based assay for tuberculosis infection (e.g., QuantiFERON-TB Gold Plus or T-SPOT.TB) to screen for latent or active TB, which would support the diagnosis of Pott's disease." | "Based on the comprehensive imaging and microbiological findings, the patient has a complex, multi-pathogen infectious spondylodiscitis involving both Mycobacterium tuberculosis and a co-infection with Escherichia coli. The presence of vertebral bone destruction and a soft tissue mass, coupled with positive NGS for both organisms, is a highly unusual and severe presentation that requires a tailored, dual-target treatment strategy.  Best Antibiotic Treatment Plan  The treatment must simultaneously address the acute, likely pyogenic, co-infection and the chronic mycobacterial infection.  1. For Mycobacterium tuberculosis (Skeletal Tuberculosis):  Regimen: The standard of care is a four-drug antituberculous regimen.  Drugs:  Isoniazid (INH): 5 mg/kg orally once daily  Rifampin (RIF): 10 mg/kg orally once daily  Pyrazinamide (PZA): 20-25 mg/kg orally once daily  Ethambutol (EMB): 15-20 mg/kg orally once daily  Initial Phase: The four-drug combination should be administered for the first 2 months.  Continuation Phase: Following the initial phase, the regimen should be simplified to Isoniazid and Rifampin.  Total Length of Use: The total duration of therapy for skeletal tuberculosis is prolonged, typically 9 to 12 months, depending on the patient's clinical and radiological response.  2. For the Escherichia coli Co-infection:  Drug Choice: The patient's severe inflammatory response and the high E. coli sequence number suggest this organism is a major contributor to the acute illness. Given the absence of specific susceptibility data, an effective broad-spectrum agent with good bone and tissue penetration is required. A carbapenem is the most reliable choice.  Drug: Etapenem is a suitable choice for this purpose. It is a broad-spectrum antibiotic with excellent activity against E. coli and is not significantly affected by the potent inducing properties of Rifampin.  Dosage: 1 g IV every 24 hours. Dosing should be adjusted based on renal function.  Length of Use: The treatment for the acute pyogenic co-infection should be for a shorter, targeted duration of 10 to 14 days, guided by the patient's clinical improvement and normalization of inflammatory markers.  Overall Treatment Plan:  Initial 10-14 days: The patient should receive a five-drug regimen: INH + RIF + PZA + EMB + Etapenem.  After 10-14 days: Discontinue Etapenem and continue with the standard four-drug antituberculous regimen for a full 2 months.  Continuation Phase: After 2 months, transition to INH + RIF for the remainder of the 9-12 month course.  Important Considerations:  Drug-Drug Interactions: Careful management of the drug-drug interactions is paramount, particularly with Rifampin, which can significantly reduce the efficacy of many other medications.  Surgical Consultation: Given the extensive bone destruction and soft tissue mass, an orthopedic or neurosurgical consultation is essential. Surgical debridement and stabilization may be required to achieve a cure.  Monitoring: The patient should be closely monitored for signs of drug-induced hepatotoxicity (liver function tests), as the TB regimen is potentially hepatotoxic." |

## Supplementary Table 7. Clinical characteristics and LLM responses of Case 7

| Medical history summary | A female in her mid 70s admitted to the hospital due to "red and swollen of left eye with vision loss for 4 days". Four days ago, the patient accidentally fell and experienced systemic pain，and the visual acuity in the left eye rapidly decreased. The redness and swelling in the left eye worsened these days. The eyeball protruded outward along with fever. The examination was conducted on August 14, 2024 at 12:23 (urgent). Procalcitonin: procalcitonin: 26.70 ng/mL; 2024-08-14 12:41 (Emergency) Blood routine CRP: White blood cell count: 12.5 × 10 ^ 9/L, absolute neutrophil count: 11.41 × 10 ^ 9/L, whole blood CRP: 235.6 mg/L, platelet count: 49 × 10 ^ 9/L ; | |
| --- | --- | --- |
| Laboratory and imaging findings | Peripheral blood NGS: Streptococcus agalactiae sequence number 754 Blood culture shows Streptococcus agalactiae: Penicillin S, Levofloxacin S, Clindamycin R, Erythromycin R, Linezolid S, Vancomycin S, Chloramphenicol S | |
| Answers | Preliminary Diagnosis and Investigations Strategy | Treatment Strategy |
| DeepSeek-R1 | "Diagnostic Considerations in Order of Likelihood:  1. Orbital Cellulitis with Abscess Formation  Rationale:  The patient presents with acute-onset proptosis, fever, severe inflammatory markers (CRP 235.6 mg/L, procalcitonin 26.70 ng/mL), neutrophilia, and vision loss—classic features of orbital cellulitis. The elevated procalcitonin (a marker of severe bacterial infection) and antecedent trauma (fall) suggest bacterial invasion into the postseptal orbit, likely complicated by abscess formation. Platelet count reduction may reflect sepsis-associated consumptive coagulopathy. Orbital cellulitis frequently originates from contiguous sinusitis or trauma, with Staphylococcus aureus and Streptococcus species as common pathogens.  2. Invasive Fungal Sinusitis with Orbital Extension  Rationale:  Immunocompromised states (e.g., thrombocytopenia) and uncontrolled hyperglycemia (if present) increase risk for angioinvasive fungi (Mucorales, Aspergillus). Proptosis, rapid vision loss, and systemic inflammation align with fungal invasion into orbital tissues. Thrombocytopenia could indicate disseminated fungal sepsis. However, the absence of documented immunocompromise or diabetic history lowers this probability slightly.  3. Septic Cavernous Sinus Thrombosis (CST)  Rationale:  Severe systemic inflammation (procalcitonin >10 ng/mL correlates with septic shock risk), thrombocytopenia, and unilateral orbital symptoms raise concern for CST—a rare but life-threatening complication of untreated orbital cellulitis. CST typically presents with bilateral symptoms, but early stages may mimic isolated orbital infection. Vision loss and proptosis suggest thrombotic compromise of orbital vasculature or cranial nerve involvement.  Next Steps in Examination:  Imaging:  Orbital/Paranasal Sinus CT with Contrast: Assess for postseptal fat stranding, subperiosteal abscess, sinus opacification, or bony erosion.  MRI Brain/Orbits with Venography: Evaluate for cavernous sinus thrombosis, intracranial abscess, or fungal invasion (e.g., T2 hypointense lesions in mucormycosis).  Microbiological Workup:  Blood Cultures ×2: Identify bacteremia/fungemia.  Orbital Abscess Aspiration (if CT confirms): Gram stain, aerobic/anaerobic cultures, fungal/PCR testing.  Nasal Endoscopy with Biopsy (if fungal suspected): Histopathology for hyphae.  Ophthalmologic Evaluation:  Formal visual acuity testing, intraocular pressure, and fundoscopy to rule out ischemic optic neuropathy or retinal artery occlusion.  Systemic Assessment:  Coagulation profile (DIC screening), HbA1c (to exclude undiagnosed diabetes), and lactate (sepsis severity).  ENT Consultation:  Rule out sinonasal source of infection (e.g., acute ethmoiditis) requiring surgical drainage." | "Based on the provided antimicrobial susceptibility results and current infectious disease guidelines, here are the antibiotic treatment recommendations for Group B Streptococcus (GBS, i.e., Streptococcus agalactiae) bloodstream infection:  1. First-line Drug: Penicillin  Basis: Group B Streptococcus is highly susceptible to penicillin, and penicillin is the first-line agent for treating GBS infections (in the absence of allergy).  Dosage:  Penicillin G: 24 million units per day, administered intravenously in 6 divided doses (4 million units every 4 hours).  Or Ampicillin: 2g intravenously every 4 hours.  Duration of therapy: Typically 10-14 days for bloodstream infection. If complicated by endocarditis, osteomyelitis, etc., extend duration to 4-6 weeks.  2. Alternative Regimens (e.g., Penicillin Allergy or Need for Simplified Dosing)  Vancomycin:  Dosage: 15-20 mg/kg (based on actual body weight) intravenously every 8-12 hours. Therapeutic drug monitoring is required (trough level target: 15-20 μg/mL).  Duration: Same as penicillin (10-14 days).  Ceftriaxone (if non-severe allergy): 2g intravenously once daily (susceptibility should be confirmed, but GBS is typically susceptible).  Levofloxacin (Susceptible but not first-line):  Dosage: 750 mg intravenously/orally once daily.  Note: Fluoroquinolone monotherapy may increase the risk of resistance. Combination therapy (e.g., with penicillin) is recommended, or reserve for cases where beta-lactams cannot be used.  3. Not Recommended Drugs  Clindamycin and Erythromycin: Avoid use due to confirmed resistance.  Linezolid and Chloramphenicol: Although susceptible, they are considered second-line agents (risk of bone marrow suppression, especially chloramphenicol) and should be reserved for multidrug-resistant situations or special circumstances.  4. Duration Adjustment Basis  Uncomplicated bloodstream infection: 10-14 days (requires ensuring source control, e.g., catheter removal, management of urinary/biliary tract infection).  With complications (e.g., purulent foci, endocarditis): Extend to 4-6 weeks.  Rapid improvement: If blood cultures clear, the infection source is controlled, and clinical improvement is significant, consider shortening to 7-10 days (requires close follow-up).  5. Key Considerations  Infection Source Control:  Investigate potential sources like urinary tract, biliary tract, or pelvic infections (common sources for GBS). Imaging (Ultrasound/CT) if necessary.  If catheter-related, remove the catheter.  Monitoring:  Repeat blood cultures (at 48-72 hours) to confirm clearance.  Monitor renal function (especially during vancomycin or high-dose penicillin use).  Allergy Management: If penicillin allergy is reported, clarify the type (IgE-mediated allergy requires avoidance of beta-lactams).  Summary of Regimens  First-line: Penicillin G 4 million units IV every 4 hours for 10-14 days.  Alternative: Vancomycin 15-20 mg/kg IV every 8-12 hours (monitor levels) for 10-14 days.  Simplified Therapy (e.g., for outpatient transition): Ceftriaxone 2g IV once daily. Once stable, transition to oral amoxicillin (1g every 8 hours) to complete the course.  It is recommended to adjust the plan based on the patient's specific condition (e.g., immune status, infection source, complications) and in consultation with the Infectious Diseases department." |
| ChatGPT-5 | "Based on the clinical presentation and laboratory findings, the three most probable diagnoses are as follows, arranged in descending order of likelihood:  1. Orbital Cellulitis with Intraorbital Abscess Formation (possibly secondary to post-traumatic hematogenous spread)  Rationale:  The patient presents with classic signs of orbital cellulitis—periorbital erythema, swelling, proptosis, acute visual loss, and systemic inflammatory response with marked neutrophilic leukocytosis, hyper-CRP, and highly elevated procalcitonin, indicating severe bacterial infection. The preceding trauma may have facilitated either direct inoculation or hematogenous spread, particularly in an elderly host. The profound elevation in procalcitonin (26.7 ng/mL) and the presence of thrombocytopenia support a systemic, potentially invasive bacterial process.  2. Endogenous Endophthalmitis (possibly secondary to bacteremia following trauma)  Rationale:  Given the systemic inflammatory response, vision loss, and absence of a clear external source of ocular infection, endogenous endophthalmitis should be considered, particularly in the elderly post-trauma patient with potential transient bacteremia. The presentation overlaps with orbital cellulitis but would more typically involve ocular pain, vision impairment, and a primary intraocular rather than extraocular focus. This may coexist with or evolve into orbital involvement if diagnosis is delayed.  3. Necrotizing Fasciitis of the Periorbital Region (Type I polymicrobial or Type II streptococcal)  Rationale:  Rapid progression of inflammation with systemic toxicity, thrombocytopenia, and extensive tissue involvement, including signs suggestive of deep soft tissue necrosis (proptosis, swelling, severe pain), should raise concern for necrotizing fasciitis. Although rare in the periorbital region, elderly and immunocompromised patients (e.g., due to trauma or microvascular disease) are susceptible. This is a surgical emergency and should be actively ruled out.  Recommended Next Diagnostic Steps  1. Urgent Orbital and Cranial Imaging  - Contrast-enhanced orbital MRI or CT scan to assess for:  - Abscess formation  - Extra/intraocular involvement  - Extension into the cavernous sinus or intracranial space  2. Ophthalmology and Otolaryngology Consultation  - Immediate ophthalmologic slit-lamp and fundoscopy to evaluate for endophthalmitis.  - ENT evaluation to exclude sinus involvement or occult source.  3. Microbiological Workup  - Blood cultures x2 sets prior to antibiotics  - Ocular fluid aspiration (if possible) for Gram stain, culture, and PCR.  - Nasopharyngeal and sinus swabs if sinusitis is suspected.  4. Laboratory Work-up for Organ Dysfunction  - Renal function, liver enzymes, coagulation profile (rule out sepsis-associated DIC)  - Serial lactate levels to monitor for tissue hypoperfusion  Would you like help drafting a diagnostic algorithm or checklist for this kind of acute orbital-infectious presentation?" | "Thank you. With confirmation of Streptococcus agalactiae (Group B Streptococcus, GBS) in both peripheral blood next-generation sequencing (NGS) and blood culture, and given the clinical picture of severe orbital infection with possible intraocular involvement, systemic dissemination, and signs of sepsis (marked CRP, procalcitonin, thrombocytopenia), this is a life-threatening invasive GBS infection, requiring prompt, high-dose parenteral therapy.  Pathogen Summary  - Organism: Streptococcus agalactiae (Group B Streptococcus)  - Antibiotic Susceptibility:  - Susceptible: Penicillin, Levofloxacin, Linezolid, Vancomycin, Chloramphenicol  - Resistant: Clindamycin, Erythromycin  - Resistance to clindamycin/erythromycin suggests MLSB phenotype, so macrolides and lincosamides should be avoided.  Recommended Antimicrobial Regimen  First-line Choice (Bactericidal, Narrow-Spectrum)  Drug: Penicillin G sodium  - Dose: 4 million units IV every 4 hours (i.e., 24 million units/day)  - Duration: Minimum 14 days, extend to 4–6 weeks if:  - There is intraocular extension (e.g., endophthalmitis)  - Brain involvement or osteomyelitis of orbital bones is present  - Note: In severe cases or when CNS penetration is a concern, combination with ceftriaxone may be considered initially.  Alternative (if penicillin not available or concern for tissue penetration in early phase):  Drug: Ceftriaxone  - Dose: 2 g IV every 12 hours  - Rationale: Good CNS/orbital penetration, excellent activity against GBS  Add-on or Substitution in β-lactam Allergy (Non-anaphylactic):  Drug: Vancomycin  - Dose: 15–20 mg/kg IV every 8–12 hours, adjust for renal function and target trough 15–20 μg/mL  - Caveat: Less bactericidal than β-lactams; use only if penicillin allergy is severe  For Confirmed or Suspected Intraocular Involvement (Endophthalmitis):  1. Intravitreal antibiotics (administered by ophthalmology):  - Vancomycin 1 mg/0.1 mL intravitreal  - Ceftazidime 2.25 mg/0.1 mL intravitreal  2. Consider systemic steroids only after adequate antimicrobial coverage if optic nerve inflammation threatens irreversible vision loss.  Duration and Monitoring  - Uncomplicated bacteremia: 14 days after first negative blood culture  - Orbital/Intracranial involvement: 4–6 weeks  - Repeat blood cultures every 48–72 hours until negative  - Monitor:  - CBC, renal and hepatic function  - Inflammatory markers (CRP, PCT)  - Imaging follow-up (MRI/CT orbit) within 5–7 days  Would you like help creating a brief treatment summary table for documentation or ward handover?" |
| Grok 3 | "Based on the patient's acute presentation of a rapidly progressive unilateral orbital inflammation and vision loss, accompanied by severe systemic signs of infection, a life-threatening infectious process is the primary concern. The high fever, marked leukocytosis, and extremely elevated inflammatory markers (CRP, procalcitonin) are highly indicative of a severe bacterial etiology with a high likelihood of associated bacteremia and sepsis. The thrombocytopenia suggests a possible progression to disseminated intravascular coagulation (DIC).  Differential Diagnosis  1. Orbital Cellulitis: This is the most probable diagnosis. It represents a severe infection of the soft tissues posterior to the orbital septum. The clinical signs of proptosis (eyeball protrusion), pain, and acute vision loss are classic features. The high-grade inflammatory markers and systemic symptoms indicate a fulminant course with a high probability of an orbital abscess or a systemic complication like bacteremia.  2. Cavernous Sinus Thrombosis: This is a critical, life-threatening consideration. It represents a septic thrombosis of the cavernous sinus, often arising from an orbital or sinus infection. The patient's fever, proptosis, and severe systemic inflammation are consistent with this diagnosis. The rapid decrease in visual acuity could be due to optic nerve compression or venous congestion from the thrombosis, making this a crucial and urgent differential to exclude.  3. Septic Sinusitis with Secondary Orbital or Intracranial Extension: While not a singular diagnosis, it is the most likely underlying etiology for the patient's symptoms. A severe bacterial sinusitis, particularly in the ethmoid or sphenoid sinuses, can spread directly into the orbit, causing cellulitis, or, less commonly, to the cavernous sinus or intracranially. The systemic symptoms are consistent with the burden of infection originating from an undrained sinus.  Proposed Next Steps in Examination  1. Radiological Imaging:  Orbital and Sinus CT with Contrast: An immediate CT scan of the orbits and paranasal sinuses with intravenous contrast is mandatory. This will precisely delineate the extent of the infection, differentiate between preseptal and orbital cellulitis, identify a subperiosteal or orbital abscess, and evaluate for underlying sinusitis.  2. Microbiological Studies:  Blood Cultures: Given the extremely high procalcitonin and the signs of systemic inflammatory response syndrome (SIRS), at least two sets of blood cultures should be drawn immediately to identify the causative organism and guide targeted antibiotic therapy.  3. Specialist Consultation:  Ophthalmology Consultation: An urgent consultation with an ophthalmologist is essential for a detailed eye exam to assess visual acuity, pupillary response, and intraocular pressure, and to evaluate for signs of optic nerve compromise.  Otolaryngology (ENT) Consultation: An ENT specialist should be consulted to evaluate the paranasal sinuses as a potential source of infection and to determine the need for surgical drainage of an underlying abscess.  4. Laboratory Investigations:  Coagulation Panel (PT/INR, aPTT, D-dimer): These tests are crucial to assess for evidence of disseminated intravascular coagulation (DIC), which is a life-threatening complication of sepsis suggested by the patient's severe thrombocytopenia." | "Based on the information provided, the patient has a serious infection caused by Streptococcus agalactiae (Group B Streptococcus), confirmed by both blood culture and next-generation sequencing (NGS) of peripheral blood, with a sequence number of 754 indicating a significant presence of the organism. The antibiotic sensitivity testing shows the following:  - Sensitive: Penicillin, Levofloxacin, Linezolid, Vancomycin, Chloramphenicol  - Resistant: Clindamycin, Erythromycin  The goal is to determine the best antibiotic treatment, including the drug choice, dosage, and duration, for this patient. Let’s break this down step-by-step.  Step 1: Understanding the Infection  Streptococcus agalactiae is a gram-positive bacterium commonly associated with infections such as cellulitis, bacteremia, and, in severe cases, central nervous system or ocular involvement. The context suggests a female patient in her mid 70s with orbital cellulitis, potentially complicated by cavernous sinus thrombosis or endophthalmitis—serious conditions requiring effective and well-penetrating antibiotics. The patient’s age and the severity of the infection, along with a low platelet count (49 × 10⁹/L), indicate a need for careful consideration of treatment efficacy and safety.  Step 2: Evaluating Antibiotic Options  The sensitivity profile provides several options, but we need to select the most appropriate one based on clinical guidelines, tissue penetration, and practicality:  - Penicillin:  - S. agalactiae is typically highly sensitive to penicillin, making it the drug of choice for most infections caused by this organism.  - For severe infections, high-dose Penicillin G (e.g., 18-24 million units per day IV, divided into 4-6 doses) is effective.  - It penetrates adequately into most tissues, though its penetration into ocular and central nervous system (CNS) tissues is moderate unless high doses are used or inflammation enhances penetration.  - Ceftriaxone:  - A third-generation cephalosporin, ceftriaxone is effective against S. agalactiae (though not explicitly listed in the sensitivity report, Group B Streptococcus is generally sensitive to cephalosporins).  - It offers excellent penetration into ocular tissues and the cerebrospinal fluid (CSF), which is critical for orbital cellulitis with possible CNS involvement.  - It has a simpler dosing regimen (e.g., 2 grams IV once daily), making it practical for elderly patients.  - Levofloxacin:  - A fluoroquinolone with good tissue penetration, including the eye. However, beta-lactams (like penicillin and ceftriaxone) are preferred for streptococcal infections due to superior efficacy and safety.  - Risks in the elderly include tendonitis and other side effects, making it less ideal.  - Vancomycin:  - Effective against S. agalactiae and reserved for penicillin-allergic patients or resistant strains. Since the organism is penicillin-sensitive and no allergy is mentioned, vancomycin is unnecessary.  - It has good tissue penetration but requires monitoring of levels and renal function.  - Linezolid and Chloramphenicol:  - Linezolid is an option for resistant gram-positive infections but is not needed here.  - Chloramphenicol is rarely used due to significant side effects (e.g., bone marrow suppression), especially in a patient with thrombocytopenia.  Step 3: Selecting the Best Antibiotic  For S. agalactiae, penicillin is the gold standard, but the severity of orbital cellulitis and potential complications (e.g., cavernous sinus thrombosis) favor an antibiotic with excellent tissue and CSF penetration. Ceftriaxone stands out because:  - It is highly effective against S. agalactiae.  - It penetrates well into ocular tissues and CSF, addressing the infection site effectively.  - Its once-daily dosing (2 grams IV) is simpler than penicillin’s frequent dosing (e.g., 4 million units every 4 hours), improving compliance and reducing burden in an elderly patient.  - It avoids the nephrotoxicity risks of aminoglycosides (e.g., gentamicin, sometimes added for synergy in severe cases) in a 75-year-old patient.  While Penicillin G (24 million units/day) is a viable alternative, ceftriaxone’s practicality and penetration profile make it preferable. There’s no evidence of penicillin allergy, renal impairment, or other contraindications to guide otherwise.  Step 4: Determining Dosage  - Ceftriaxone:  - Standard dose for severe infections like orbital cellulitis is 1-2 grams IV once daily.  - Given the severity (proptosis, vision loss) and possible CNS involvement, 2 grams IV once daily is appropriate.  - For confirmed CNS infections (e.g., meningitis), 2 grams every 12 hours is used, but without clear neurological signs beyond orbital involvement, once daily suffices with close monitoring.  Step 5: Setting the Duration  - Orbital cellulitis typically requires 10-14 days of IV antibiotics, depending on clinical response and complications (e.g., abscess requiring drainage).  - Given the patient’s age, severity, and thrombocytopenia (possibly indicating sepsis), a 14-day course is reasonable, with reassessment based on clinical improvement, imaging, and laboratory trends.  Step 6: Additional Considerations  - The blood culture and NGS confirm S. agalactiae as the primary pathogen, reducing the need for broader coverage (e.g., for MRSA or anaerobes) unless clinical worsening suggests a polymicrobial infection.  - Thrombocytopenia and potential renal function (not specified) should be monitored, but ceftriaxone is generally safe without significant hematologic or renal concerns at this dose.  Final Recommendation  The best antibiotic treatment for this patient, considering efficacy, tissue penetration, and practicality, is:  - Drug Choice: Ceftriaxone  - Dosage: 2 grams IV once daily  - Duration: 14 days, with reassessment based on clinical response and follow-up imaging if needed  This regimen effectively targets Streptococcus agalactiae, addresses the severe orbital cellulitis, and is suitable for a patient in his early 70s, assuming no contraindications like severe renal impairment or allergy. Close monitoring of the patient’s clinical status, platelet count, and renal function is advised during treatment.  _Disclaimer: Grok is not a doctor; please consult one. Don't share information that can identify you._" |
| Gemini 2.5 Flash | "Based on the patient's acute presentation of a rapidly progressive unilateral orbital inflammation and vision loss, accompanied by severe systemic signs of infection, a life-threatening infectious process is the primary concern. The high fever, marked leukocytosis, and extremely elevated inflammatory markers (CRP, procalcitonin) are highly indicative of a severe bacterial etiology with a high likelihood of associated bacteremia and sepsis. The thrombocytopenia suggests a possible progression to disseminated intravascular coagulation (DIC).  Differential Diagnosis  1. Orbital Cellulitis: This is the most probable diagnosis. It represents a severe infection of the soft tissues posterior to the orbital septum. The clinical signs of proptosis (eyeball protrusion), pain, and acute vision loss are classic features. The high-grade inflammatory markers and systemic symptoms indicate a fulminant course with a high probability of an orbital abscess or a systemic complication like bacteremia.  2. Cavernous Sinus Thrombosis: This is a critical, life-threatening consideration. It represents a septic thrombosis of the cavernous sinus, often arising from an orbital or sinus infection. The patient's fever, proptosis, and severe systemic inflammation are consistent with this diagnosis. The rapid decrease in visual acuity could be due to optic nerve compression or venous congestion from the thrombosis, making this a crucial and urgent differential to exclude.  3. Septic Sinusitis with Secondary Orbital or Intracranial Extension: While not a singular diagnosis, it is the most likely underlying etiology for the patient's symptoms. A severe bacterial sinusitis, particularly in the ethmoid or sphenoid sinuses, can spread directly into the orbit, causing cellulitis, or, less commonly, to the cavernous sinus or intracranially. The systemic symptoms are consistent with the burden of infection originating from an undrained sinus.  Proposed Next Steps in Examination  1. Radiological Imaging:  Orbital and Sinus CT with Contrast: An immediate CT scan of the orbits and paranasal sinuses with intravenous contrast is mandatory. This will precisely delineate the extent of the infection, differentiate between preseptal and orbital cellulitis, identify a subperiosteal or orbital abscess, and evaluate for underlying sinusitis.  2. Microbiological Studies:  Blood Cultures: Given the extremely high procalcitonin and the signs of systemic inflammatory response syndrome (SIRS), at least two sets of blood cultures should be drawn immediately to identify the causative organism and guide targeted antibiotic therapy.  3. Specialist Consultation:  Ophthalmology Consultation: An urgent consultation with an ophthalmologist is essential for a detailed eye exam to assess visual acuity, pupillary response, and intraocular pressure, and to evaluate for signs of optic nerve compromise.  Otolaryngology (ENT) Consultation: An ENT specialist should be consulted to evaluate the paranasal sinuses as a potential source of infection and to determine the need for surgical drainage of an underlying abscess.  4. Laboratory Investigations:  Coagulation Panel (PT/INR, aPTT, D-dimer): These tests are crucial to assess for evidence of disseminated intravascular coagulation (DIC), which is a life-threatening complication of sepsis suggested by the patient's severe thrombocytopenia." | "Based on the definitive results from peripheral blood NGS and blood culture, the patient has a severe systemic infection caused by Streptococcus agalactiae (Group B Streptococcus, GBS) with a complicated orbital cellulitis. The susceptibility report confirms that the organism is sensitive to penicillin, which remains the drug of choice for treating invasive GBS infections.  Best Antibiotic Treatment Plan  The management of severe GBS bacteremia with a deep-seated infection requires a bactericidal agent delivered at high doses for a prolonged period.  Drug Choice: Penicillin G is the gold standard for treating invasive infections caused by Streptococcus agalactiae. The organism is universally susceptible to penicillin, and resistance has not been a clinical issue.  Alternative: Ampicillin is an equally effective alternative due to its similar mechanism of action and excellent activity against GBS.  Dosage: A high-dose intravenous regimen is required to ensure adequate tissue penetration and bactericidal activity, particularly in a severe infection like this.  Penicillin G: 4 to 5 million units IV every 4 hours.  Ampicillin: 2 g IV every 4 hours.  Length of Use: The total duration of therapy for a severe GBS infection with bacteremia and a focal infection like orbital cellulitis is at least 14 days.  The duration should be guided by the patient's clinical response, including the resolution of fever, normalization of inflammatory markers (WBC, CRP, procalcitonin), and improvement of the local orbital signs. The antibiotic course may need to be extended beyond 14 days based on the findings of follow-up imaging and clinical assessment by the ophthalmology and ENT teams.  Important Considerations:  Source Control: In addition to antibiotic therapy, it is crucial to identify and manage any potential source of the infection. The ophthalmology and ENT specialists should evaluate for an underlying orbital or subperiosteal abscess that may require surgical drainage to ensure a successful outcome.  Sepsis Management: Given the patient's high procalcitonin and severe thrombocytopenia, she is at high risk for septic shock and disseminated intravascular coagulation (DIC). Antibiotic therapy must be part of a broader, aggressive management strategy for sepsis, including hemodynamic support and close monitoring of laboratory values." |

## Supplementary Table 8. Clinical characteristics and LLM responses of Case 8

| Medical history summary | A male in his early 20s was admitted to the hospital due to "fever for more than 10 days". The patient developed a fever more than 10 days ago, with a maximum temperature of 39.8 ℃ and no cough or chest tightness. The patient was treated with clindamycin for 3 days, and the symptoms improved slightly, but still had low fever，and multiple subcutaneous nodules were appeared in the neck, Therefore, the patient came to our hospital for treatment. Blood routine examination showed white blood cell count of 8.5 × 10 ^ 9/L, neutrophil percentage of 20.0% , lymphocyte percentage of 61.0%, atypical lymphocytes of 12.00%, and whole blood CRP of 16.1 mg/L | |
| --- | --- | --- |
| Laboratory and imaging findings | 2022-07-25 09:40 EB virus antibody: EB virus capsid antigen IgG: 79.9U/mL, EB virus capsid antigen IgM: 82.9U/mL, EBV capsid antigen IgA: negative; 2022-08-01 10:17 EB virus antibody: EB virus capsid antigen IgG: 103.0 U/mL, EB virus capsid antigen IgM: 156.0 U/mL, EBV capsid antigen IgA: negative; EB-DNA 6.65E+4; B-ultrasound: Bilateral supraclavicular lymph node enlargement, bilateral inguinal lymph node enlargement, recommended for biopsy, gallbladder wall edema, multiple lymph node enlargement in the porta hepatis, splenomegaly. Right inguinal lymph node biopsy specimen: lymphoid tissue proliferative lesion, combined with immunohistochemistry, considering reactive hyperplasia, prone to infectious mononucleosis. Immunohistochemistry: A2-01 (right inguinal lymph node): CD20 (B cell++), CD79a (B cell++), CD3 (T cells++), CD5 (T cells++), CD21 (FDC+), CD23 (FDC+), CD10 (-), Bcl-2 (50%+), Bcl-6 (partially+), MUM1 (+), CD30 (scattered+), CD163 (diffuse++), CD15 (-), Ki-67 (40%+), Myeloproxidase (scattered+), CD123 (scattered+). EBER ISH(+) | |
| Answers | Preliminary Diagnosis and Investigations Strategy | Treatment Strategy |
| DeepSeek-R1 | Most Likely Diagnoses in Order of Probability:  1. Epstein-Barr Virus (EBV) Infectious Mononucleosis  Rationale: The presence of prolonged fever, lymphocytosis (61%), and atypical lymphocytes (12%) strongly aligns with EBV. Subcutaneous nodules may represent reactive lymphoproliferative lesions or immune-mediated phenomena (e.g., cutaneous hypersensitivity). EBV-associated lymphoid hyperplasia can rarely present as nodular soft tissue lesions, particularly in immunocompetent hosts.  2. Acute HIV Seroconversion Syndrome  Rationale: Acute HIV infection mimics mononucleosis, with fever, lymphocytosis, and atypical lymphocytes. Subcutaneous nodules may reflect immune complex deposition or secondary infections (e.g., disseminated fungal or mycobacterial disease in early immunosuppression). Risk-factor assessment (sexual history, IV drug use) is critical.  3. Disseminated Tuberculosis (TB) with Cutaneous Involvement  Rationale: Prolonged fever and subcutaneous nodules (e.g., tuberculous gummas or metastatic abscesses) suggest disseminated TB. Atypical lymphocytes may arise from chronic antigen stimulation. Neutropenia and elevated CRP are nonspecific but compatible with chronic granulomatous inflammation.  Next Steps in Examination:  1. Microbiological/Serologic Testing:  - EBV: IgM/IgG viral capsid antigen (VCA), EBV nuclear antigen (EBNA), and heterophile antibody.  - HIV: Fourth-generation antigen/antibody combo, HIV RNA PCR if acute infection suspected.  - Tuberculosis: Interferon-gamma release assay (IGRA), sputum/bronchoalveolar lavage for AFB smear/culture, and mycobacterial PCR.  - Other: CMV PCR, Toxoplasma gondii IgM/IgG, Bartonella serology.  2. Imaging:  - Chest X-ray/CT: Assess for mediastinal lymphadenopathy, miliary nodules (TB), or hepatosplenomegaly (EBV/HIV).  - Ultrasound/CT of Subcutaneous Nodules: Evaluate for abscess formation, granulomas, or necrotizing lesions.  3. Biopsy & Histopathology:  - Excisional biopsy of a subcutaneous nodule for histology (e.g., caseating granulomas in TB, CD8+ T-cell infiltration in EBV), Gram/acid-fast staining, and culture (bacterial, fungal, mycobacterial).  4. Additional Labs:  - Peripheral Blood Smear: Confirm atypical lymphocytes and rule out hematologic malignancies.  - Blood Cultures: Exclude bacteremia/septic emboli.  - CRP/ESR Trends: Monitor inflammatory activity.  Note: Prioritize exclusion of acute HIV and TB due to public health implications and need for urgent intervention. Biopsy of nodules is critical to differentiate infectious vs. reactive etiologies." | Antibiotic Treatment Recommendations  Primary Diagnosis: EBV Infectious Mononucleosis (confirmed by rising VCA-IgM/IgG titers, EBER ISH+ lymph node biopsy, and high EBV DNA load).  Key Considerations:  1. EBV is a viral infection; antibiotics are not indicated unless bacterial coinfection is confirmed.  2. Clindamycin use was inappropriate for EBV and may have contributed to transient symptom relief via anti-inflammatory effects or incidental coverage of undiagnosed bacterial pharyngitis.  3. Avoid aminopenicillins (e.g., amoxicillin, ampicillin): 80-100% of EBV-associated infectious mononucleosis patients develop a maculopapular rash with these agents.  Management Plan:  1. Antiviral Therapy  - Limited role in EBV: Acyclovir/valacyclovir may reduce viral shedding but do not shorten disease duration or improve symptoms in immunocompetent hosts.  - Rationale for use: Consider only in severe cases (e.g., meningoencephalitis, persistent high viral load with organ dysfunction).  - Valacyclovir: 1g PO TID × 10–14 days (if used).  2. Antibiotics  - Not recommended unless secondary bacterial infection is confirmed (e.g., GABHS pharyngitis, abscess formation).  - If bacterial coinfection suspected (e.g., elevated CRP, neutrophilia, purulent exudate):  - First-line: Cephalexin 500 mg PO QID × 10 days (avoids aminopenicillin rash risk).  - Alternative: Azithromycin 500 mg PO daily × 5 days (if penicillin allergy).  3. Supportive Care  - Corticosteroids: Consider prednisone 0.5–1 mg/kg/day × 3–7 days ONLY for severe complications (e.g., airway obstruction, hemophagocytic lymphohistiocytosis).  - Hydration/analgesia: NSAIDs/acetaminophen for fever/malaise.  4. Monitoring  - Serial EBV DNA PCR: Monitor viral load trends if persistent symptoms or complications (e.g., splenic rupture risk).  - Splenic precautions: Avoid contact sports × 4–6 weeks (splenomegaly on ultrasound).  Critical Notes:  - Biopsy findings (reactive hyperplasia, EBER+): Confirm EBV-driven lymphoproliferation; no evidence of lymphoma or secondary infection.  - Subcutaneous nodules: Likely immune-mediated (e.g., cutaneous lymphoid hyperplasia) rather than infectious; resolve with EBV control.  - Persistent fever/lymphadenopathy: Evaluate for chronic active EBV infection (CAEBV) if symptoms persist >3 months with high viral load.    Conclusion: Avoid empiric antibiotics unless clear bacterial coinfection is identified. Focus on supportive care and symptom management. If antivirals are used, temper expectations regarding clinical efficacy." |
| ChatGPT-5 | "Based on the clinical presentation—persistent fever >10 days, subacute onset of multiple cervical subcutaneous nodules, lymphocytosis with atypical lymphocytes, and an inadequate response to clindamycin—I propose the following three most likely infectious disease diagnoses, listed in order of descending probability:  1. Infectious Mononucleosis (Epstein-Barr Virus, EBV infection)  - Rationale: The patient presents with prolonged fever, cervical lymphadenopathy (manifesting as subcutaneous nodules), lymphocytosis with atypical lymphocytes (12%), and a reversed neutrophil-to-lymphocyte ratio, all of which are highly characteristic of EBV-associated infectious mononucleosis. The age group (young adult) is typical, and the lack of response to antibiotics further supports a viral etiology.  - Next Steps: Order EBV serology, including VCA-IgM, VCA-IgG, and EBNA antibodies; assess peripheral blood smear morphology; consider quantitative EBV PCR to evaluate viremia if complications or atypical course is suspected.  2. Cytomegalovirus (CMV) Infection  - Rationale: CMV infection can mimic EBV mononucleosis, especially in adults, presenting with prolonged febrile illness, marked lymphocytosis with atypical lymphocytes, and elevated CRP. The absence of pharyngitis and splenomegaly (if confirmed on exam) may favor CMV over EBV, although clinical distinction is difficult without serological confirmation.  - Next Steps: Perform CMV serology (IgM and IgG) and CMV PCR from plasma. If immunocompromised state is suspected, consider assessing CMV viral load quantitatively.  3. Toxoplasmosis  - Rationale: Toxoplasma gondii infection, especially in immunocompetent individuals, may present as a mononucleosis-like syndrome with prolonged low-grade fever, lymphadenopathy (particularly cervical), and atypical lymphocytosis. The lack of response to antibacterial agents and the relatively mild CRP elevation are consistent with this diagnosis.  - Next Steps: Test for Toxoplasma IgM and IgG antibodies. If diagnostic uncertainty persists, consider PCR for Toxoplasma in blood or lymph node biopsy if accessible.  Additional Workup Plan  - Imaging: Perform cervical ultrasound or contrast-enhanced CT of the neck to characterize the lymphadenopathy (size, necrosis, matting).  - Hematologic Evaluation: Consider flow cytometry if lymphocytosis persists or is >50% of total WBCs to rule out hematologic malignancies (e.g., T-cell lymphoma or ALL), especially if lymphadenopathy is generalized or nodules are atypical.  - Microbiological cultures: Blood cultures and serologic testing for Bartonella henselae, HIV, and Mycobacterium tuberculosis (including IGRA and AFB staining/culture from lymph node aspirate/biopsy) should be added if clinical suspicion evolves.  Let me know the results of imaging or serology, and we can refine the differential or expand it based on new data." | "Thank you for the comprehensive follow-up. The diagnostic picture is now significantly clarified.  Final Diagnosis:  EBV-Associated Infectious Mononucleosis with Reactive Lymphoid Hyperplasia  - Serology: Strongly positive for VCA-IgM and VCA-IgG, seroconversion confirmed over time.  - EBV DNA: 6.65 × 10⁴ copies/mL, supporting active viral replication.  - Histopathology: Lymph node biopsy consistent with reactive hyperplasia (not lymphoma), with EBER ISH(+) confirming EBV involvement of lymphoid tissue.  - Immunophenotype: Polyclonal reactive architecture (mixture of B and T cells, no clonal dominance, no CD10 or CD15 expression, moderate Ki-67), supporting a benign/reactive process.  Antibiotics Not Indicated  Rationale:  - Infectious mononucleosis due to EBV is a self-limited viral illness, and antibacterial therapy is neither effective nor appropriate in immunocompetent individuals unless there is a documented secondary bacterial superinfection.  - The patient has already received clindamycin without improvement and shows no clinical or imaging evidence of secondary bacterial pharyngitis, otitis, sinusitis, pneumonia, or abscess.  When EBV DNA Is Elevated  - EBV DNA levels in the range of ~10⁴–10⁵ copies/mL are not uncommon during acute primary EBV infection.  - Antiviral therapy (e.g., ganciclovir, valganciclovir, or acyclovir) has not been shown to alter disease course in typical infectious mononucleosis and is not routinely recommended in immunocompetent hosts.  When Antibiotics Might Be Needed:  Only consider antibiotic therapy if:  1. There is bacterial superinfection (e.g., streptococcal tonsillitis or pneumonia).  2. The patient becomes immunocompromised or develops EBV-related HLH or lymphoma (not the case here).  3. There are signs of severe necrotizing lymphadenitis with suspected anaerobic or staphylococcal infection (not supported by imaging or histology).  Avoid These Antibiotics  - Aminopenicillins (e.g., ampicillin, amoxicillin): High risk of triggering a morbilliform rash in EBV-infected individuals, unrelated to allergy but due to immune activation.  Recommended Plan (Non-antibiotic Focus)  1. Supportive care: Hydration, analgesia (paracetamol/NSAIDs), rest.  2. Monitor: EBV DNA levels and lymphadenopathy for resolution; splenic rupture risk (advise against contact sports).  3. Repeat EBV DNA after 2–4 weeks if clinical status worsens or does not improve.  4. Re-evaluate with PET-CT and second biopsy only if lymphadenopathy persists beyond 6–8 weeks or shows transformation.  If you'd like, I can assist with antiviral considerations in immunocompromised scenarios or help draft monitoring protocols. Would you like a template for outpatient follow-up in this case?" |
| Grok 3 | "Based on the clinical presentation of a male patient in his early 20s with a fever exceeding 10 days (maximum 39.8°C), absence of respiratory symptoms, partial response to clindamycin, and the emergence of subcutaneous nodules in the neck—coupled with laboratory findings of a normal white blood cell count (8.5 × 10⁹/L), lymphocytosis (61.0%), reduced neutrophils (20.0%), atypical lymphocytes (12.0%), and elevated CRP (16.1 mg/L)—the following differential diagnosis for infectious diseases is proposed, ranked in order of likelihood:  Most Likely Infectious Diseases  1. Infectious Mononucleosis (IM)  - Etiology: Epstein-Barr virus (EBV)  - Rationale: The combination of prolonged fever, cervical subcutaneous nodules (likely lymphadenopathy), and a hematological profile showing lymphocytosis with atypical lymphocytes is highly suggestive of IM, a common viral infection in young adults. The partial response to clindamycin may reflect coincidental improvement or resolution of a secondary bacterial process, while persistent low-grade fever aligns with the natural course of EBV infection.  - Evidence Base: Studie underscore the classic triad of fever, lymphadenopathy, and atypical lymphocytosis in IM, with prevalence peaking in adolescents and young adults.  2. Tuberculosis (TB)  - Etiology: Mycobacterium tuberculosis  - Rationale: TB can manifest with chronic fever and cervical lymphadenopathy (scrofula), presenting as subcutaneous nodules, particularly in extrapulmonary forms common in younger patients. The atypical lymphocytes and rapid symptom onset are less characteristic, but lymphocytosis can occur in early or disseminated disease, making TB a plausible differential in high-prevalence settings.  - Evidence Base: Recent data highlight extrapulmonary TB as a significant entity, with lymphadenopathy as a frequent presentation, though hematologic findings are less specific.  3. Cat Scratch Disease (CSD)  - Etiology: Bartonella henselae  - Rationale: CSD may present with fever and regional lymphadenopathy manifesting as subcutaneous nodules, particularly in the neck, following cat exposure; however, atypical lymphocytes are uncommon, and clindamycin is not a primary therapeutic agent, reducing its likelihood compared to IM. The inflammatory response (elevated CRP) aligns with CSD, but the hematologic picture deviates from typical findings.  - Evidence Base: Research confirms CSD’s association with lymphadenopathy and fever, though lymphocytosis with atypical cells is rare, favoring other diagnoses .  Next Steps in Examination  To refine the diagnosis and guide management, the following investigations are recommended, grounded in current evidence-based practice:  1. Monospot Test or EBV Serology  - Purpose: Rapid detection of heterophile antibodies (Monospot) or specific EBV viral capsid antigen (VCA) IgM/IgG to confirm IM.  - Rationale: High sensitivity and specificity for acute EBV infection.  2. Lymph Node Biopsy or Fine-Needle Aspiration (FNA)  - Purpose: Histopathology, acid-fast bacilli staining, culture, and molecular testing (e.g., GeneXpert MTB/RIF) to evaluate for TB, CSD, or other etiologies.  - Rationale: Provides definitive tissue diagnosis, critical in atypical presentations.  3. Imaging Studies (Chest X-ray or CT Neck/Chest)  - Purpose: Assess for pulmonary involvement (TB) or extent of lymphadenopathy.  - Rationale: Noninvasive visualization of occult disease sites.  4. Blood Cultures  - Purpose: Exclude bacteremia or persistent bacterial infection unresponsive to clindamycin.  - Rationale: Essential in ruling out systemic bacterial causes.  5. Additional Serology (if indicated)  - Purpose: HIV, syphilis, or Bartonella serology based on risk factors or clinical suspicion.  - Rationale: Broadens differential in atypical cases.  Summary  Infectious Mononucleosis ranks as the most probable diagnosis due to the patient’s age, lymphocytosis with atypical lymphocytes, and cervical nodules, followed by Tuberculosis and Cat Scratch Disease as less likely alternatives contingent on exposure history and regional epidemiology. The proposed examinations prioritize rapid, specific testing (e.g., Monospot) alongside invasive diagnostics (e.g., biopsy) to confirm the etiology in this tertiary-care setting.  _Disclaimer: Grok is not a doctor; please consult one. Don't share information that can identify you._" | "Based on the information provided, the patient has been diagnosed with infectious mononucleosis caused by the Epstein-Barr virus (EBV). This diagnosis is supported by the following findings:  - Serology Results: Positive IgM and IgG antibodies to the EBV capsid antigen, with increasing titers over time (IgM from 82.9 U/mL on July 25, 2022, to 156.0 U/mL on August 1, 2022, and IgG from 79.9 U/mL to 103.0 U/mL), indicating an active and recent infection. The negative IgA suggests no chronic or reactivated infection.  - EBV DNA: A viral load of 6.65E+4 copies/mL confirms active viral replication.  - Imaging: B-ultrasound shows bilateral supraclavicular and inguinal lymph node enlargement, splenomegaly, and gallbladder wall edema, all of which are consistent with infectious mononucleosis.  - Biopsy and Immunohistochemistry: The right inguinal lymph node biopsy demonstrates lymphoid tissue proliferative lesion with reactive hyperplasia, supported by immunohistochemistry (e.g., CD20++, CD3++, CD163 diffuse++, Ki-67 40%+) and a positive EBER in situ hybridization (ISH), further confirming EBV as the etiology.  Infectious mononucleosis is a viral illness, and antibiotics are not indicated for the treatment of uncomplicated EBV infections in immunocompetent patients. The current scientific evidence, including guidelines from the Centers for Disease Control and Prevention (CDC) and the Infectious Diseases Society of America (IDSA), recommends supportive care—such as rest, hydration, and analgesics (e.g., acetaminophen or ibuprofen) for fever and pain—as the mainstay of management. Antibiotics are only warranted if there is a confirmed or strongly suspected secondary bacterial infection, such as streptococcal pharyngitis, which can occasionally complicate EBV infection.  In this case, there is no clinical or laboratory evidence of a bacterial co-infection:  - The lymph node biopsy shows reactive hyperplasia, not bacterial abscess or infection.  - No symptoms such as severe sore throat, purulent tonsillar exudate, or positive bacterial cultures are mentioned.  - The gallbladder wall edema could suggest acalculous cholecystitis (a rare EBV complication), but this is typically managed conservatively without antibiotics unless bacterial superinfection is evident, which is not indicated here.  The patient was initially treated with clindamycin for 3 days, with slight symptom improvement but persistent low-grade fever and subsequent appearance of subcutaneous nodules (likely enlarged lymph nodes). Clindamycin, typically used for gram-positive bacterial or anaerobic infections, is not a standard choice for upper respiratory infections and was likely given empirically before the EBV diagnosis was confirmed. The partial improvement may reflect the natural course of the viral illness rather than a response to antibiotics, and the lack of complete resolution supports that the primary pathology is viral.  Given the query’s request for the "best antibiotic treatment, including the correct drug choice, dosage, length of the antibiotic use," it appears to assume antibiotics are necessary. However, based on the robust evidence and the patient’s confirmed diagnosis, antibiotics are not required. Providing an antibiotic regimen in the absence of a bacterial indication risks unnecessary side effects (e.g., antibiotic resistance, Clostridioides difficile infection) and is not supported by current medical standards.  Recommendation  No antibiotic treatment is necessary for this patient with confirmed infectious mononucleosis and no evidence of a secondary bacterial infection. Management should focus on supportive care, including:  - Adequate hydration  - Rest  - Analgesics (e.g., acetaminophen 500-1000 mg every 6 hours as needed, not exceeding 4000 mg/day) for fever and discomfort  If clinical suspicion of a secondary bacterial infection (e.g., streptococcal pharyngitis) arises later—based on new symptoms like severe throat pain or positive cultures—targeted antibiotic therapy could be considered, such as:  - Penicillin V: 500 mg orally four times daily for 10 days (for streptococcal infection)  - Azithromycin: 500 mg on day 1, then 250 mg daily for 4 days (if penicillin-allergic)  However, at this time, with the data provided, there is no indication for antibiotic use." |
| Gemini 2.5 Flash | "Based on the patient's clinical presentation of a prolonged febrile illness with new-onset lymphadenopathy, coupled with a specific hematological profile, the most likely diagnoses are those that cause a mononucleosis-like syndrome. The hematological findings of relative lymphocytosis and the presence of atypical lymphocytes are particularly diagnostic.  Differential Diagnosis  1. Epstein-Barr Virus (EBV) Infection (Infectious Mononucleosis): This is the most probable diagnosis. The classic triad of fever, lymphadenopathy (manifesting as subcutaneous nodules), and fatigue, especially in a young adult, is highly suggestive of infectious mononucleosis. The laboratory findings of a relative lymphocytosis with a high percentage of atypical lymphocytes are the pathognomonic hematological signs of an acute EBV infection.  2. Cytomegalovirus (CMV) Infection: CMV can cause a clinical syndrome that is indistinguishable from infectious mononucleosis. This is a common pathogen that can lead to prolonged fever and lymphadenopathy. The laboratory findings of lymphocytosis and atypical lymphocytes are also characteristic of CMV infection, making it a crucial differential diagnosis that must be distinguished from EBV.  3. Acute Human Immunodeficiency Virus (HIV) Infection: Primary or acute HIV infection can present with a mononucleosis-like syndrome, including fever, lymphadenopathy, and a flu-like illness. The hematological picture can mimic that of EBV or CMV infection, with a relative lymphocytosis and sometimes atypical lymphocytes. Given the non-specific nature of the initial symptoms and the persistence of the febrile illness, a high index of suspicion is warranted.  Proposed Next Steps in Examination  1. Serological and Molecular Diagnostics:  EBV Serology: A panel of EBV-specific serological tests, including viral capsid antigen (VCA) IgM and IgG, and nuclear antigen (EBNA) IgG, should be performed to confirm an acute EBV infection.  CMV Serology: CMV IgM and IgG serology should be ordered to determine if the patient has an acute or prior infection.  HIV Testing: A fourth-generation HIV-1/2 antigen/antibody combination test should be performed to screen for acute or chronic HIV infection. If the test is negative but clinical suspicion remains high, an HIV RNA PCR should be considered.  2. Microbiological Confirmation:  Molecular Assays: Consider performing quantitative PCR for EBV and CMV DNA on a blood specimen. This can help confirm an active viral process and distinguish between primary infection and reactivation.  3. Other Investigations:  Ultrasound of the Neck: An ultrasound of the neck can be performed to characterize the subcutaneous nodules and confirm that they are lymphadenopathy, as well as to assess for the presence of other masses.  Thorough Clinical History: A detailed history regarding social contacts, travel, and potential exposures (sexual history) would be crucial to guide further testing and strengthen the differential diagnosis." | "Based on the definitive serological, molecular, and histopathological findings, the patient has a confirmed diagnosis of acute infectious mononucleosis caused by Epstein-Barr virus (EBV). The rising EBV VCA IgM and IgG titers, coupled with the presence of active viral replication (EB-DNA 6.65E+4) and the pathognomonic immunohistochemical finding of EBER ISH (+) in the reactive lymphoid tissue, leaves no doubt as to the diagnosis.  Best Treatment Plan  The fundamental principle of managing infectious mononucleosis is that it is a self-limiting viral illness. Therefore, antibiotic treatment is not indicated for the primary infection. Administering antibiotics, particularly ampicillin or amoxicillin, to a patient with infectious mononucleosis can result in a widespread, non-allergic rash, which can be misinterpreted as a true drug allergy.  Drug Choice: No antibiotics are required for the treatment of the EBV infection itself. The illness is managed with supportive care.  Dosage: Not applicable.  Length of Use: Not applicable. The illness is self-limiting, and symptoms typically resolve over a period of several weeks to a few months.  Correct Management Recommendations  The treatment strategy for this patient should focus on supportive care and the management of potential complications.  1. Supportive Care:  Rest and Hydration: The patient should be advised to get plenty of rest and maintain adequate fluid intake.  Symptom Management: Over-the-counter antipyretics and analgesics, such as acetaminophen or non-steroidal anti-inflammatory drugs (NSAIDs), can be used to manage fever, headache, and myalgia.  2. Patient Counseling and Safety:  Avoid Strenuous Activity: Given the documented splenomegaly on B-ultrasound, the patient should be strictly advised to avoid contact sports, heavy lifting, and any strenuous physical activity for at least one month, or until the splenomegaly has resolved on follow-up imaging. This is to prevent the rare but life-threatening complication of splenic rupture.  Course of Illness: The patient should be informed that the symptoms, particularly fatigue, can persist for a few weeks to several months and that this is a normal part of the disease course." |

## Supplementary Table 9. Clinical characteristics and LLM responses of Case 9

| Medical history summary | A female in her mid 30s was admitted to the emergency department due to "fever with headache for 10 days". The patient had a fever without obvious cause 10 days ago, with a highest temperature of 39.8 ℃. She was given antibiotics such as Levofloxacin and Cefuroxime, but did not show significant improvement. She got a headache and sometimes nausea . She vomited once this morning without abdominal pain or diarrhea, and was unconscious. The examination showed that the white blood cell count was 6.2 × 10 ^ 9/L, the red blood cell count was 4.19 × 10 ^ 12/L, the whole blood CRP was 20.2 mg/L, the hemoglobin was 122g/L, and the platelet count was 223 × 10 ^ 9/L; procalcitonin: 0.15ng/mL; | |
| --- | --- | --- |
| Laboratory and imaging findings | Cerebrospinal fluid test: nucleated cells: 16 × 10 ^ 6/L, lymphocyte percentage: 90%, Pan's test: weakly positive; Adenosine deaminase: 1U/L, Glucose: 3.60mmol/L, Chlorine: 125.4mmol/L, Protein content: 22.7mg/dL; Cerebrospinal fluid Infection pathogen metagenomic testing report: human herpesvirus type 1 (36 sequences); | |
| Answers | Preliminary Diagnosis and Investigations Strategy | Treatment Strategy |
| DeepSeek-R1 | "Diagnostic Considerations and Next Steps  Clinical Summary:  A female in her mid 30s presents with 10 days of refractory fever (39.8°C), headache, nausea, and acute encephalopathy. Initial empiric antibiotics (levofloxacin/cefuroxime) failed. Labs show mild systemic inflammation (CRP 20.2 mg/L) without leukocytosis, thrombocytopenia, or elevated procalcitonin.  Top Three Likely Diagnoses (Order of Probability):  1. Viral Encephalitis (e.g., Herpes Simplex Virus-1)  - Rationale: Subacute progression to altered consciousness with fever and headache is classic for HSV encephalitis. Normal procalcitonin and partial antibiotic resistance argue against bacterial etiology. HSV preferentially involves temporal lobes, though imaging is pending.  - Support: CRP elevation aligns with neuroinflammation; WBC may remain normal in early viral CNS infection.  2. Partially Treated Bacterial Meningitis  - Rationale: Prior antibiotics may suppress CSF culture/PCT but fail to resolve infection if blood-brain barrier penetration is suboptimal (e.g., cephalosporins for Listeria).  - Support: Persistent fever despite antibiotics; nausea/vomiting suggests intracranial hypertension.  3. Tuberculous Meningitis (TBM)  - Rationale: Subacute fever, headache, and encephalopathy over 10 days fit TBM’s timeline. Normal PCT and moderate CRP are nonspecific but consistent with granulomatous inflammation.  - Support: Higher prevalence in endemic regions; risk increases with immunosuppression (unclear here).  Critical Exclusion:  - Autoimmune Encephalitis (e.g., anti-NMDA): Fever less prominent, but CSF autoantibody testing may be needed.  - Cryptococcal Meningitis: Requires HIV/immunocompromise history; India ink stain/antigen testing.  Immediate Diagnostic Plan:  1. Neuroimaging:  - MRI Brain with Contrast: Assess for temporal lobe hyperintensity (HSV), basal meningeal enhancement (TBM), or abscess.  - CT Head (if MRI delayed): Rule out mass effect prior to lumbar puncture (LP).  2. Lumbar Puncture:  - CSF Analysis:  - Cell count/differential (lymphocytic vs. neutrophilic predominance).  - Protein, glucose (low glucose in TBM/bacterial).  - PCR for HSV-1/2, VZV, enteroviruses.  - AFB smear/culture, Xpert MTB/RIF (TBM).  - Cryptococcal antigen, India ink.  - Opening Pressure: Elevated in TBM or fungal meningitis.  3. Additional Testing:  - Blood: HIV serology, quantiferon/TB-IGRA, viral serology (arboviruses if endemic).  - EEG: If nonconvulsive status epilepticus suspected.  Rationale for Prioritization:  HSV encephalitis is time-critical due to high mortality without early acyclovir. TBM requires prolonged therapy, and delayed treatment worsens outcomes. Partially treated bacterial meningitis necessitates broader CSF pathogen detection (e.g., 16S rRNA PCR if cultures negative).  Evidence Basis:  - IDSA 2023 Guidelines: LP and empiric acyclovir within 6 hours for suspected encephalitis.  - NEJM 2022 Review: Xpert MTB/RIF Ultra increases TBM diagnostic sensitivity to ~70%.  Final Note:  Proceed urgently with LP/MRI. If LP contraindicated, empiric acyclovir and antitubercular therapy (ATT) may be warranted pending results, depending on epidemiologic risk." | "Optimal Antiviral Therapy for Confirmed Herpes Simplex Virus-1 (HSV-1) Encephalitis  Diagnostic Confirmation:  CSF metagenomic testing confirms HSV-1 encephalitis as the definitive diagnosis, supported by:  - CSF lymphocytic pleocytosis (16 cells/μL, 90% lymphocytes).  - Positive HSV-1 PCR (sequence count 36).  - Mildly elevated protein (22.7 mg/dL) with normal glucose (3.60 mmol/L), typical of viral CNS infection.  First-Line Antiviral Therapy:  Acyclovir  - Dose: 10 mg/kg IV every 8 hours (adjusted to ideal body weight).  - Infusion Rate: Administer over 1 hour to minimize nephrotoxicity risk.  - Duration: 14–21 days (minimum 14 days; extend to 21 days if clinical response is slow, immunocompromised status, or persistent CSF HSV-1 PCR positivity).  Key Rationale:  - Acyclovir reduces mortality from 70% to 10–20% when initiated early. It inhibits viral DNA polymerase, halting HSV-1 replication.  - IV administration is mandatory due to poor blood-brain barrier penetration of oral formulations.  Renal Monitoring and Dose Adjustment:  - Baseline creatinine: Assess renal function before initiation.  - Hydration: Ensure adequate hydration (e.g., 1–2 L/day IV fluids) to prevent crystalline nephropathy.  - Dose Adjustments:  - CrCl 25–50 mL/min: Reduce dose to 10 mg/kg every 12 hours.  - CrCl <25 mL/min: Reduce dose to 5 mg/kg every 24 hours.  Adjunctive Management:  1. Seizure Prophylaxis:  - Monitor for seizures; initiate levetiracetam or lacosamide if seizures occur.  2. Intracranial Pressure (ICP) Management:  - Elevate head of bed to 30°, hypertonic saline/mannitol if signs of cerebral edema.  3. Discontinue Empiric Antibiotics:  - No evidence of bacterial co-infection (normal CSF glucose, lymphocytic predominance, negative cultures).  Critical Follow-Up:  1. Repeat Lumbar Puncture:  - Perform HSV-1 PCR at 14 days to guide duration:  - Negative PCR: Consider stopping at 14 days.  - Positive PCR: Extend to 21 days and recheck.  2. MRI Brain:  - Repeat at 10–14 days to assess temporal lobe inflammation/necrosis.  3. EEG:  - Evaluate for nonconvulsive status epilepticus if persistent encephalopathy.  Evidence Basis:  - IDSA 2023 Guidelines: Acyclovir remains first-line for HSV encephalitis; 14–21 days based on clinical/virologic response.  - Lancet Neurology 2022: Delayed acyclovir initiation (>48 hours from symptom onset) correlates with worse outcomes (e.g., cognitive deficits).  Final Note:  Initiate acyclovir immediately and continue for 14–21 days. Monitor renal function daily and adjust dosing accordingly. If clinical deterioration occurs (e.g., rising ICP, seizures), escalate neurocritical care support. Long-term neurorehabilitation may be required due to HSV-1-associated neuronal injury." |
| ChatGPT-5 | "Thank you for the clear and detailed clinical scenario. Based on the information provided — subacute febrile illness with progressive headache, altered mental status, mild systemic inflammation, and lack of response to broad-spectrum antibiotics — the differential should center on central nervous system infections and neurotropic pathogens.  Top 3 Differential Diagnoses (Ranked)  1. Viral Encephalitis (most likely HSV-1 or arboviral)  Rationale:  - The combination of fever, headache, nausea, vomiting, and altered consciousness is highly consistent with encephalitic syndrome.  - HSV-1 is the most common cause of sporadic encephalitis in immunocompetent adults.  - The relatively normal WBC count, mildly elevated CRP, and low PCT are more typical of viral infections than bacterial ones.  2. Tuberculous Meningitis  Rationale:  - Subacute onset over 10 days with progressive headache and neurological deterioration fits the typical timeline of TB meningitis.  - Absence of leukocytosis or overt inflammatory markers does not exclude it; CSF is often the key.  - Vomiting without abdominal findings can reflect raised intracranial pressure.  3. Rickettsial CNS Involvement or Scrub Typhus with Meningoencephalitis  Rationale:  - Rickettsial infections (including Orientia tsutsugamushi) can rarely involve the CNS and mimic viral or tuberculous meningitis.  - Exposure history is often vague or unnoticed; eschar may not always be present.  - Normal peripheral leukocyte count and minimal PCT elevation are consistent; CRP may be mildly raised.  Next Step in Diagnostic Workup  Neuroimaging  - Urgent Brain MRI with contrast to assess for:  - Temporal lobe involvement (suggestive of HSV)  - Basal meningeal enhancement (suggestive of TBM)  - Hydrocephalus, infarcts, or abscesses  Lumbar Puncture (CSF analysis)  - Opening pressure  - Cell count and differential  - Protein, glucose (CSF:serum ratio)  - Gram stain, acid-fast bacilli (AFB) stain  - CSF PCR panel (HSV-1/2, VZV, enteroviruses, TB GeneXpert if available)  - India ink stain (if immunocompromised is suspected)  Other Targeted Investigations  - HIV testing  - Chest imaging to evaluate for latent or active TB  - Serum IgM/IgG for Rickettsia or Scrub Typhus (if endemic)  - mNGS from CSF (if available)  Would you like a structured diagnostic flowchart tailored to CNS infections in this setting?" | "Thank you for providing the CSF profile and metagenomic results.  Confirmed Diagnosis  Herpes Simplex Virus Type 1 (HSV-1) Encephalitis  - CSF profile is consistent with viral meningoencephalitis:  - Mild lymphocytic pleocytosis (16 × 10⁶/L, 90% lymphocytes)  - Normal glucose  - Mildly elevated protein  - Weakly positive Pan's test suggests mild blood–brain barrier disruption  - CSF mNGS confirms HSV-1 DNA, which is the most common cause of sporadic encephalitis in adults.  Antiviral Treatment Recommendation  First-Line Agent: Acyclovir (IV)  - Dose:  - 10 mg/kg IV every 8 hours  - Adjust by actual body weight  - Requires renal function-based dosing (reduce dose in renal impairment)  - Infusion time:  - Infuse over 1 hour to minimize nephrotoxicity (precipitation in renal tubules)  - Duration:  - 14–21 days  - Typically 14 days for immunocompetent patients  - 21 days for immunocompromised or with delayed clinical response or imaging abnormalities  - Renal monitoring:  - Check serum creatinine and urine output daily  - Ensure adequate IV hydration to prevent nephrotoxicity  Adjunctive Measures  - Neuroimaging follow-up (MRI): To assess resolution of inflammation  - Repeat LP (optional): Consider at day 14 if poor clinical recovery or persistent fever  - Consider switch to oral valacyclovir (1 g TID) only after full IV course, and only if patient has fully recovered and HSV-PCR becomes negative — though this is rarely done in HSV-1 CNS disease  If desired, I can provide a clinical flowchart for HSV encephalitis management and monitoring. Would you like that?" |
| Grok 3 | "As an Infectious Diseases specialist, I have evaluated the case of a female in her mid 30s presenting with a 10-day history of fever (up to 39.8°C) and headache, refractory to Levofloxacin and Cefuroxime, accompanied by nausea, a single episode of vomiting, and a period of unconsciousness. Laboratory findings include a normal white blood cell count (6.2 × 10⁹/L), normal red blood cell count (4.19 × 10¹²/L), slightly low hemoglobin (122 g/L), normal platelet count (223yourself 223 × 10⁹/L), mildly elevated C-reactive protein (CRP, 20.2 mg/L), and slightly elevated procalcitonin (0.15 ng/mL). Below, I outline the three most likely infectious disease diagnoses, ranked by probability, with rationale based on the clinical presentation and available data, followed by recommended next steps in diagnostic evaluation.  Diagnoses (Ranked by Likelihood)  1. Viral Encephalitis  - Rationale: The subacute onset of fever, headache, and altered mental status (unconsciousness) strongly suggests central nervous system (CNS) involvement, consistent with encephalitis. The lack of significant improvement with broad-spectrum antibiotics (Levofloxacin and Cefuroxime) and a normal white blood cell count favor a viral etiology over bacterial infection. Common pathogens include herpes simplex virus (HSV), which is a leading cause of sporadic encephalitis and aligns with this presentation, supported by robust evidence as a frequent etiology in adults.  2. Tuberculous Meningitis  - Rationale: This diagnosis is considered due to the subacute course (10 days), persistent fever despite antibiotics not effective against Mycobacterium tuberculosis, and CNS involvement indicated by unconsciousness. While the normal peripheral white blood cell count is atypical (tuberculous meningitis often shows cerebrospinal fluid lymphocytosis), systemic markers can vary, and this remains a plausible differential, particularly if risk factors (e.g., endemic area residence) are present.  3. Partially Treated Bacterial Meningitis  - Rationale: Bacterial meningitis (e.g., Streptococcus pneumoniae or Neisseria meningitidis) could explain fever, headache, and unconsciousness, but the normal white blood cell count and lack of response to Levofloxacin and Cefuroxime (not first-line for meningitis) suggest either inadequate therapy or a resistant pathogen. Partial treatment might blunt systemic inflammation, aligning with the modest CRP elevation.  Next Plan in Examination  To refine the diagnosis, the following diagnostic steps are critical:  - Lumbar Puncture with Cerebrospinal Fluid (CSF) Analysis: Essential to differentiate between viral, bacterial, tuberculous, or other causes. Analyze CSF for cell count, differential, protein, glucose, Gram stain, bacterial culture, viral polymerase chain reaction (PCR) (especially HSV), and tuberculosis PCR or culture. This is a cornerstone of CNS infection diagnosis.  - Detailed History and Physical Examination: Obtain travel history, exposure to infectious contacts, insect bites, or immunocompromising conditions, and examine for focal neurological deficits, rash, or lymphadenopathy to narrow differentials.  - Neuroimaging (CT or MRI Brain): Assess for evidence of meningitis (e.g., meningeal enhancement) or encephalitis (e.g., temporal lobe involvement in HSV), and rule out alternative causes of unconsciousness (e.g., mass lesions).  - Additional Laboratory Tests: As guided by initial findings, consider blood cultures, HIV serology, and specific serological tests (e.g., Lyme, rickettsial diseases) if risk factors emerge.  These steps will provide definitive data to confirm the etiology and guide subsequent management in this complex case.  _Disclaimer: Grok is not a doctor; please consult one. Don't share information that can identify you._" | "Based on the cerebrospinal fluid (CSF) test and metagenomic testing report you provided, the patient has been diagnosed with herpes simplex virus type 1 (HSV-1) encephalitis. The key findings supporting this diagnosis include:  - Nucleated cells: 16 × 10^6/L (elevated, indicating inflammation)  - Lymphocyte percentage: 90% (lymphocytic predominance, typical of viral infections)  - Pandy's test: Weakly positive (suggesting increased protein)  - Protein content: 22.7 mg/dL (mildly elevated, consistent with viral encephalitis)  - Metagenomic testing: Detection of human herpesvirus type 1 (HSV-1) DNA in the CSF  Other parameters, such as glucose (3.60 mmol/L) and chloride (125.4 mmol/L), are within normal limits, and adenosine deaminase (1 U/L) is not elevated, further aligning with a viral rather than bacterial or tuberculous process.  Best Treatment for HSV-1 Encephalitis  HSV-1 encephalitis is caused by a virus, not a bacterium, so the treatment involves an antiviral medication rather than a traditional antibiotic. The most effective and standard treatment is intravenous acyclovir, a nucleoside analogue that inhibits HSV-1 DNA replication.  Treatment Plan  - Drug Choice: Acyclovir  - Dosage: 10 mg/kg intravenously every 8 hours  - Duration: 14 to 21 days  Details and Rationale  1. Drug Choice:  Acyclovir is the first-line treatment for HSV-1 encephalitis due to its specific action against herpesviruses. It works by stopping viral DNA replication, reducing the spread of the virus in the brain and improving patient outcomes when started early.  2. Dosage:  The recommended dose for adults is 10 mg/kg every 8 hours, administered intravenously. This dosage ensures sufficient penetration into the central nervous system (CNS) to combat the infection effectively.  3. Duration:  Treatment typically lasts 14 to 21 days, depending on the patient’s clinical response. A minimum of 14 days is standard, but therapy may extend to 21 days if symptoms persist or follow-up CSF testing (if performed) shows ongoing viral presence.  Additional Considerations  - Renal Function Monitoring: Acyclovir can be nephrotoxic (toxic to the kidneys), especially if the patient is dehydrated or has pre-existing kidney issues. Regular monitoring of serum creatinine levels is necessary, and adequate hydration should be maintained during treatment.  - Clinical Monitoring: Watch for improvement in symptoms such as fever, headache, and altered mental status. Regular neurological assessments are recommended to track recovery or detect complications.  - Follow-Up: In some cases, a repeat CSF analysis after 14 days may be considered to confirm the virus has been cleared, particularly if the patient’s recovery is slow.  Summary  The best treatment for this patient with HSV-1 encephalitis is intravenous acyclovir at a dosage of 10 mg/kg every 8 hours for 14 to 21 days. This regimen is highly effective and aligns with standard clinical guidelines. Close monitoring of kidney function and the patient’s clinical response is essential for a successful outcome.  Note: While you asked for the ""best antibiotic treatment,"" HSV-1 is a virus, and acyclovir is an antiviral drug. This is the appropriate therapy based on the diagnosis. Always consult a healthcare provider for individualized treatment decisions." |
| Gemini 2.5 Flash | "Based on the patient's clinical presentation of a subacute fever that has progressed to a state of unconsciousness, along with normal hematological parameters and a very low procalcitonin level, the focus of the differential diagnosis should be on non-pyogenic causes of meningoencephalitis. The lack of a robust response to standard broad-spectrum antibiotics further supports this hypothesis.  Differential Diagnosis  1. Viral Meningoencephalitis: This is the most probable diagnosis. The patient's prolonged febrile illness and subsequent rapid progression to severe neurological symptoms, including headache and unconsciousness, are classic for viral meningoencephalitis. The normal leukocyte count and particularly the low procalcitonin level are highly suggestive of a viral, rather than a severe bacterial, etiology. Common pathogens include Herpes Simplex Virus (HSV) or arboviruses depending on geographic exposure.  2. Atypical Bacterial Meningitis/Encephalitis: While a typical pyogenic bacterial meningitis is less likely given the low procalcitonin, certain atypical bacteria can cause a more subacute or chronic meningoencephalitis with a less dramatic systemic inflammatory response. Pathogens such as Listeria monocytogenes can cause a meningoencephalitis that presents with headache and altered mental status, particularly in individuals with certain risk factors, and may not trigger a high procalcitonin response.  3. Infectious Vasculitis or Autoimmune Encephalitis: Given the patient's age and the rapid progression of neurological symptoms, a non-infectious etiology, such as autoimmune encephalitis, should be considered if infectious causes are ruled out. This condition can mimic viral encephalitis and sometimes presents with a preceding flu-like illness. A severe infectious process can also trigger a secondary vasculitis, leading to neurological symptoms, which would fall under this broader category.  Proposed Next Steps in Examination  1. Neuroimaging:  Urgent Brain MRI with Contrast: An MRI is mandatory prior to a lumbar puncture and is the definitive imaging modality for meningoencephalitis. It can detect subtle parenchymal changes (e.g., temporal lobe hyperintensities characteristic of HSV encephalitis), as well as rule out brain abscesses or mass effect that would contraindicate an LP.  2. Cerebrospinal Fluid (CSF) Analysis:  Urgent Lumbar Puncture (LP): Following the MRI, a lumbar puncture is the single most important diagnostic procedure. The CSF should be sent for:  Cell count and differential: To differentiate viral pleocytosis (lymphocytic predominance) from bacterial (neutrophilic).  Protein and Glucose: To assess for typical changes seen in infectious meningoencephalitis.  PCR panels: A CSF PCR panel for common viral pathogens (e.g., HSV-1, HSV-2, Enterovirus, VZV) and bacterial pathogens is essential for rapid diagnosis.  Bacterial and Fungal Culture: To rule out less common causes.  3. Microbiological and Serological Studies:  Blood Cultures: Obtain at least two sets of blood cultures to rule out bacteremia and identify a possible systemic source of infection.  Atypical Pathogen Testing: Depending on the clinical suspicion, specialized serological or PCR testing for atypical pathogens such as Listeria monocytogenes or specific arboviruses may be warranted." | "Based on the cerebrospinal fluid (CSF) analysis and metagenomic testing, the patient has a confirmed diagnosis of viral meningoencephalitis caused by Human Herpesvirus type 1 (HSV-1), commonly known as Herpes Simplex Virus 1. The CSF findings of lymphocytic pleocytosis with a normal glucose and a positive molecular test for HSV-1 are pathognomonic for this life-threatening condition.  Best Antiviral Treatment Plan  HSV-1 encephalitis is a medical emergency that requires immediate and aggressive antiviral therapy. It is crucial to understand that antibiotics are completely ineffective against this viral illness.  Drug Choice: Aciclovir is the drug of choice for treating HSV encephalitis. It is a nucleoside analog that specifically inhibits the replication of herpesviruses and is highly effective when administered promptly.  Dosage: The dosage for treating HSV encephalitis is a high-dose intravenous regimen. The standard is 10 mg/kg intravenously every 8 hours. The dosage should be adjusted for renal function, and therapeutic levels are critical.  Length of Use: The duration of therapy is prolonged to ensure complete viral clearance from the central nervous system. The standard course is 14 to 21 days. The exact duration is guided by the patient's clinical and radiological response, with a minimum of 14 days recommended.  Important Considerations:  Urgent Initiation: Aciclovir therapy should be initiated immediately upon suspicion of HSV encephalitis and must not be delayed while awaiting confirmatory tests. The patient is already unconscious, and delaying treatment can lead to irreversible neurological damage and increased mortality.  Supportive Care: This patient is critically ill and requires management in an intensive care setting for neurological monitoring, management of intracranial pressure, and other supportive measures.  Neurology Consultation: An expert consultation with a neurologist or neurocritical care specialist is essential for comprehensive management." |

## Supplementary Table 10. Clinical characteristics and LLM responses of Case 10

| Medical history summary | A female in her late 50s was admitted to the hospital due to "fever with rash for 11 days". 11 days ago, the patient developed fever with rash after being bitten by insects. The rash was a red spotted rash scattered throughout the body, without pain or itching, no skin scab, and no lymph node enlargement. She went to the emergency department for treatment. The examination showed D-dimer 13920 μ g/L (FEU), whole blood CRP125.1mg/L, platelet count 42 × 10 ^ 9/L , white blood cell count 11.8 × 10 ^ 9/L, hemoglobin 97g/L | |
| --- | --- | --- |
| Laboratory and imaging findings | Infection pathogen metagenomic testing report: Japanese Rickettsia sequence number 23. | |
| Answers | Preliminary Diagnosis and Investigations Strategy | Treatment Strategy |
| DeepSeek-R1 | Diagnostic Considerations and Recommended Management  Clinical Summary:  A female in her late 50s presents with 11 days of fever, non-pruritic erythematous rash, and marked thrombocytopenia (42 × 10⁹/L), anemia (Hb 97 g/L), leukocytosis (11.8 × 10⁹/L), and severe systemic inflammation (CRP 125.1 mg/L, D-dimer 13,920 μg/L FEU). History of insect bite suggests arthropod-borne etiology.  Top Three Likely Diagnoses (Order of Probability):  1. Dengue Fever (Probable Severe Dengue with Warning Signs)  - Key Support: Thrombocytopenia, rash, and elevated D-dimer align with severe dengue, which can manifest plasma leakage/coagulopathy. Leukocytosis may reflect early bacterial co-infection or stress response.  - Atypical Note: Leukopenia is more typical, but leukocytosis can occur in hyperinflammatory states or secondary infection.  - Testing: NS1 antigen, IgM/IgG serology, RT-PCR. Monitor for hemorrhage/fluid overload.  2. Scrub Typhus (Orientia tsutsugamushi)  - Key Support: Fever, rash, thrombocytopenia, and markedly elevated CRP/D-dimer. Endothelial injury in rickettsiosis drives coagulopathy. Eschar absence occurs in ~40% of cases.  - Testing: Weil-Felix, IgM ELISA, or PCR. Empiric doxycycline (first-line) while awaiting results.  3. Spotted Fever Group Rickettsiosis (e.g., Rocky Mountain Spotted Fever)  - Key Support: Tick-borne etiology with fever, rash, and thrombocytopenia. Petechiae may emerge later; early rash can be macular. Elevated D-dimer reflects vasculitis-induced microthrombosis.  - Testing: Serology (IFA for IgM/IgG), skin biopsy PCR.  Additional Considerations:  - Leptospirosis: Less likely without hepatorenal labs or water exposure, but consider if endemic.  - Hemophagocytic Lymphohistiocytosis (HLH): Evaluate if ferritin/triglycerides elevated, given cytopenias and hyperinflammation.  Immediate Management:  1. Empiric Therapy:  - Doxycycline 100 mg BID (oral/IV): Covers rickettsial infections. Start immediately pending diagnostics.  - Supportive Care: Fluid resuscitation (cautious in dengue), platelet transfusion if active bleeding.  2. Diagnostic Workup:  - Serology/PCR: Dengue, Rickettsia, Leptospira.  - Blood Cultures: Rule out bacterial sepsis.  - Coagulation Studies: PT/INR, fibrinogen (assess DIC).  3. Monitoring:  - Daily CBC, CRP, LFTs, renal function.  - Serial imaging (e.g., ultrasound) if dengue shock suspected.  Rationale for Prioritization:  Geographic exposure is critical; if Southeast Asia, scrub typhus ascends. Dengue remains foremost given thrombocytopenia/D-dimer elevation, but empiric doxycycline is warranted due to rickettsial risk.  Evidence Basis:  - 2023 WHO dengue guidelines emphasize thrombocytopenia/D-dimer in severe cases.  - IDSA 2021 recommendations advocate early doxycycline for undifferentiated rickettsiosis.  Final Note:  Rapid initiation of doxycycline (if rickettsial suspected) and dengue NS1/PCR testing are critical. Adjust therapy based on results and clinical evolution. | "Optimal Antibiotic Regimen for Confirmed Japanese Rickettsiosis (Scrub Typhus)  The metagenomic detection of Orientia tsutsugamushi (formerly Rickettsia tsutsugamushi) confirms scrub typhus as the definitive diagnosis. Below is the evidence-based treatment protocol:  First-Line Therapy: Doxycycline  - Drug Choice: Doxycycline is the gold standard for scrub typhus, regardless of disease severity or patient age (including adults >50 years).  - Dose:  - Adults: 100 mg IV or orally every 12 hours (weight-based dosing not required).  - Infusion Time: If administered IV, infuse over 60 minutes to avoid venous irritation (rapid infusion risks thrombophlebitis).  - Duration:  - Minimum 7 days OR ≥3 days after defervescence, whichever is longer.  - Severe cases (e.g., multiorgan dysfunction, D-dimer >10,000 μg/L): Extend to 10–14 days.  Rationale:  - Doxycycline inhibits bacterial protein synthesis and is highly effective against Orientia tsutsugamushi, even in regions with reported heteroresistance (e.g., northern Thailand).  - Early initiation reduces mortality from >30% to <2%.  Alternative Regimens (if contraindications to doxycycline):  1. Azithromycin:  - Dose: 500 mg IV/oral once daily (infuse IV over 60 minutes).  - Use Case: Pregnancy, severe doxycycline allergy, or pediatric patients.  - Duration: 3–5 days (extend to 7 days if slow response).  2. Chloramphenicol:  - Dose: 500 mg IV/oral every 6 hours (limited by marrow toxicity; avoid in thrombocytopenia).  - Reserve for: Regions with doxycycline resistance (rare).  Adjunctive Measures:  1. Thrombocytopenia Management:  - Platelet transfusion only if active bleeding or platelet count <10 × 10⁹/L.  - Avoid NSAIDs/anticoagulants (high bleeding risk with D-dimer elevation).  2. Inflammatory Response:  - Monitor for HLH/MAS (ferritin, triglycerides, fibrinogen).  - Consider corticosteroids only if septic shock refractory to fluids/vasopressors.  3. Coagulopathy:  - Correct hypofibrinogenemia (target fibrinogen >150 mg/dL) if DIC present.  Monitoring & Follow-Up:  - Clinical: Daily fever curves, rash evolution, and hemodynamic stability.  - Labs:  - CBC every 48 hours (expect platelet recovery within 72–96 hours of doxycycline).  - CRP/D-dimer trends (should decline by day 3–5).  - Imaging: Chest X-ray if respiratory symptoms emerge (scrub typhus pneumonitis).  Evidence Basis:  - IDSA 2021 Guidelines: Doxycycline remains first-line for all rickettsioses.  - NEJM 2023 Review: Azithromycin non-inferior to doxycycline in mild scrub typhus, but inferior in severe cases.  Final Note:  Initiate doxycycline immediately. Thrombocytopenia and elevated D-dimer are expected in severe scrub typhus and should resolve with pathogen-directed therapy. If clinical deterioration occurs (e.g., rising CRP/D-dimer after 72 hours), reassess for bacterial co-infection (e.g., Leptospira) or HLH." |
| ChatGPT-5 | "Thank you for the detailed clinical vignette. Based on the current presentation and available laboratory data, here is a focused differential diagnosis using evidence-based reasoning.  Clinical Summary  - Age/Gender: a female in her late 50s  - Presentation: Fever and non-pruritic, non-painful, red maculopapular rash 11 days duration after insect bite.  - Rash: Generalized, no eschar, no scab, no lymphadenopathy.  - Labs:  - D-dimer: 13,920 μg/L (FEU)  - CRP: 125.1 mg/L  - PLT: 42 × 10⁹/L  - WBC: 11.8 × 10⁹/L  - Hb: 97 g/L  Top 3 Differential Diagnoses  1. Spotted Fever Group Rickettsiosis (e.g., Rickettsia conorii, R. rickettsii, R. africae)  - Rationale:  - History of insect (likely tick) bite  - Maculopapular rash appearing several days post exposure  - Significant thrombocytopenia, elevated inflammatory markers, and anemia  - Frequently presents without eschar in elderly or non-classical cases  - Endothelial injury leads to D-dimer elevation and risk of DIC  - Suggested Workup:  - PCR or IFA for Rickettsia spp.  - Skin biopsy of rash lesion (if feasible)  - Empirical treatment with doxycycline should be considered immediately while awaiting confirmation  2. Severe Dengue (Dengue Hemorrhagic Fever)  - Rationale:  - Compatible with febrile illness + rash + thrombocytopenia  - Elevated D-dimer and hemoconcentration or anemia are common  - Dengue rash can present as diffuse erythematous or petechial, often starting after defervescence  - Elevated CRP and leukocytosis can occur in bacterial superinfection or severe dengue forms  - Suggested Workup:  - NS1 antigen or Dengue PCR (days 0–5)  - Dengue IgM/IgG (after day 5)  - Monitor for plasma leakage (Hct, albumin), bleeding tendency, and fluid status  3. Human Monocytic Ehrlichiosis / Anaplasmosis  - Rationale:  - Tick-borne illness causing fever, rash (in some cases), cytopenias, and elevated inflammatory markers  - Rash is less common than in Rickettsial infections but can be present, especially in children and older adults  - Elevated D-dimer and CRP consistent with systemic endothelial activation  - Suggested Workup:  - PCR for Ehrlichia chaffeensis or Anaplasma phagocytophilum  - Blood smear (morulae in monocytes or granulocytes)  - Also responsive to doxycycline  Next Steps:  1. Start empiric doxycycline (100 mg BID), particularly if Rickettsiosis or Ehrlichiosis is suspected.  2. Send relevant serologies/PCRs (Rickettsia spp., Dengue, Ehrlichia/Anaplasma).  3. Monitor for signs of organ dysfunction, hemophagocytic syndrome, or bleeding.  4. Consider ultrasound of abdomen and chest X-ray to look for serositis/plasma leakage.  5. If deteriorating despite doxycycline, consider broadening coverage and evaluating for secondary bacterial sepsis.  Would you like me to draft a workup and treatment algorithm for this case?" | "Thank you. The detection of Japanese spotted fever (caused by Rickettsia japonica) via mNGS confirms a spotted fever group rickettsiosis (SFGR) diagnosis. This infection typically presents with a febrile illness, maculopapular rash, thrombocytopenia, and elevated inflammatory markers, all of which are consistent with your case. Prompt antimicrobial therapy is critical, as delays are associated with increased morbidity.  Confirmed Diagnosis  Japanese spotted fever due to Rickettsia japonica  First-Line Antibiotic Treatment  1. Doxycycline  - Dose: 100 mg orally or intravenously, twice daily  - Route selection:  - IV route is preferred in severe cases (e.g., altered mental status, hypotension, GI involvement).  - Switch to oral route as soon as the patient is stable and tolerates oral intake.  - Duration: Typically 7–10 days, or until 3 days after defervescence  - Minimum: 5–7 days  - Infusion time for IV doxycycline: Infuse over 1 hour in 100 mL normal saline to reduce phlebitis risk.  Key Considerations:  - Doxycycline is bacteriostatic against Rickettsia spp., but highly effective.  - No resistance has been reported in R. japonica.  - Safe and effective regardless of age or renal/hepatic function.  - Early initiation (<5 days of illness) is critical for reducing mortality.  Alternatives (only if doxycycline is contraindicated)  2. Minocycline  - IV/PO: 100 mg twice daily  - Similar efficacy against Rickettsia spp.  3. Chloramphenicol  - Historically used, less preferred due to bone marrow suppression risk and limited availability  - IV dose: 50–75 mg/kg/day divided q6h (max 4 g/day)  - Requires therapeutic drug monitoring  Avoid fluoroquinolones and beta-lactams — ineffective due to intracellular location of Rickettsia.  Monitoring & Supportive Care  - Platelets, liver enzymes, coagulation, and organ function daily  - Rule out DIC or hemophagocytic lymphohistiocytosis (HLH) if worsening cytopenias  - Antipyretics, IV fluids, and VTE prophylaxis as indicated  Would you like a structured treatment flowchart or discharge criteria checklist for Japanese spotted fever?" |
| Grok 3 | As an Infectious Diseases specialist, I’ll provide a detailed analysis of this female patient in her late 50s presenting with an 11-day history of fever and rash following insect bites, accompanied by significant laboratory abnormalities. The clinical picture includes a red spotted (maculopapular) rash scattered throughout the body, without pain, itching, scabs, or lymphadenopathy, alongside a markedly elevated D-dimer (13,920 μg/L FEU), elevated C-reactive protein (CRP, 125.1 mg/L), thrombocytopenia (platelet count 42 × 10^9/L), mild leukocytosis (white blood cell count 11.8 × 10^9/L), and mild anemia (hemoglobin 97 g/L). These findings suggest a systemic infectious process with potential coagulopathy, likely disseminated intravascular coagulation (DIC), triggered by an insect-borne pathogen. Below, I outline the three most likely infectious diagnoses in order of probability, followed by evidence-based management recommendations.   Differential Diagnosis  1. Rickettsial Infection (e.g., Rocky Mountain Spotted Fever, Typhus, Scrub Typhus) - Rationale: Rickettsial diseases, caused by intracellular bacteria such as Rickettsia rickettsii (Rocky Mountain spotted fever, RMSF), Rickettsia typhi (murine typhus), or Orientia tsutsugamushi (scrub typhus), are strongly associated with insect or arachnid bites (ticks, fleas, or chiggers). The 11-day incubation period aligns with typical rickettsial incubation (2–14 days). The maculopapular rash, fever, and hematological abnormalities (thrombocytopenia, elevated D-dimer suggestive of DIC) are hallmark features, particularly in severe cases. Leukocytosis, though less common than leukopenia, can occur in advanced disease due to secondary inflammation or bacterial superinfection. The absence of lymphadenopathy and eschar does not rule out rickettsial infection, as eschar is variably present (e.g., more common in scrub typhus but absent in many RMSF cases). - Evidence: Studies highlight that RMSF can progress to multiorgan failure with DIC, thrombocytopenia, and rash in 90% of cases, often starting on extremities but potentially appearing scattered. Scrub typhus, prevalent in Asia, similarly presents with fever, rash, and coagulopathy. - Likelihood: Highest due to the insect bite history, rash distribution, and severe hematological findings consistent with rickettsial vasculitis and systemic inflammation.  2. Leptospirosis - Rationale: Caused by Leptospira spp., this spirochetal infection is transmitted through contact with water or soil contaminated by infected animals (often rodents), though insect bites may facilitate exposure indirectly via environmental contamination. The biphasic illness includes an acute febrile phase with rash (maculopapular or petechial) and hematological abnormalities, including thrombocytopenia and DIC in severe Weil’s disease. The 11-day onset fits the incubation period (2–30 days, typically 7–12). Elevated CRP and leukocytosis reflect systemic inflammation, while mild anemia may suggest hemolysis, a known complication. - Evidence: Haake and Levett note that severe leptospirosis can mimic sepsis with coagulopathy, with thrombocytopenia in 50–70% of cases and rash in 10–40%. The absence of conjunctival suffusion or myalgia does not exclude it, as these are not universal. - Likelihood: Second most likely due to overlapping features with rickettsial disease, though less directly tied to insect bites unless secondary exposure occurred.  3. Severe Dengue Fever - Rationale: Dengue virus, transmitted by Aedes mosquitoes, causes fever, maculopapular or petechial rash, and thrombocytopenia, with severe cases (dengue hemorrhagic fever or dengue shock syndrome) leading to DIC and bleeding diatheses. The 11-day history is slightly long but within the range of prolonged symptomatic phases (4–10 days incubation, with extended illness in severe cases). However, leukopenia is more typical than leukocytosis, though rebound leukocytosis can occur in recovery or with secondary infection. The high D-dimer and low platelets align with severe dengue, but the scattered rash and lack of myalgia or hemorrhagic signs (e.g., bleeding gums) are less characteristic. - Evidence: WHO guidelines describe severe dengue with plasma leakage, thrombocytopenia (<100 × 10^9/L), and coagulopathy, though leukopenia is reported in 80–90% of acute cases, making the elevated WBC here atypical. - Likelihood: Third due to the mosquito-borne possibility and severe hematological findings, though leukocytosis reduces its probability compared to rickettsial or leptospiral etiologies.   Diagnostic Approach Given the urgency of this presentation (potential DIC and multiorgan involvement), empiric treatment should precede definitive diagnosis while awaiting confirmatory tests: - Serology and PCR:  - Rickettsial: IgM/IgG for R. rickettsii, R. typhi, or O. tsutsugamushi; PCR of blood or skin biopsy (rash site).  - Leptospirosis: Microscopic agglutination test (MAT) or PCR of blood/urine (early phase).  - Dengue: NS1 antigen, IgM/IgG, or RT-PCR (first 5–7 days, though less sensitive at day 11). - Blood Cultures: To rule out bacterial sepsis (e.g., Staphylococcus or Streptococcus spp.). - Additional Labs: Liver function tests (rickettsial and leptospiral hepatitis), renal function (leptospirosis), peripheral smear (hemolysis), and fibrinogen/coagulation profile (DIC confirmation).   Management Recommendations  Empiric Therapy - Rickettsial Coverage: Doxycycline 100 mg IV q12h is the drug of choice. Covers RMSF, typhus, and scrub typhus; initiate immediately due to high mortality if untreated (up to 20–30% in RMSF). - Leptospirosis Coverage: Add ceftriaxone 1 g IV q24h or penicillin G 1.5 million units IV q6h for severe cases. Doxycycline also has activity against Leptospira. - Dengue: No specific antiviral; supportive care is primary (see below).  Supportive Care - DIC Management: Monitor fibrinogen, PT/INR, and platelets; transfuse fresh frozen plasma (FFP) or platelets if bleeding occurs or platelets <20 × 10^9/L. - Fluid Resuscitation: Balanced crystalloids (e.g., Ringer’s lactate) for hypotension or hypoperfusion, avoiding overhydration in dengue due to plasma leakage risk. - Fever Control: Acetaminophen 650–1000 mg q6h; avoid NSAIDs due to bleeding risk.  Monitoring - Daily CBC, coagulation studies, and inflammatory markers (CRP). - Assess for organ dysfunction (e.g., AKI in leptospirosis, ARDS in rickettsial disease).   Final Diagnostic Ranking 1. Rickettsial Infection (e.g., RMSF, typhus, scrub typhus) – Most likely due to insect bite history, rash, and hematological profile. 2. Leptospirosis – Strong contender with similar systemic features, though less directly insect-related. 3. Severe Dengue Fever – Possible, but leukocytosis is atypical, reducing its likelihood. Initiate doxycycline ± ceftriaxone empirically, tailor therapy based on diagnostic results, and provide aggressive supportive care to address coagulopathy and systemic inflammation. Geographic context (if available) could further refine this approach. _Disclaimer: Grok is not a doctor; please consult one. Don't share information that can identify you._ | Based on the metagenomic testing report confirming Japanese Spotted Fever caused by Rickettsia japonica (sequence number 23), here is the recommended antibiotic treatment, including drug choice, dosage, and infusion time.   Recommended Antibiotic Treatment The best antibiotic for Japanese Spotted Fever is doxycycline, which is the first-line treatment for rickettsial infections, including those caused by Rickettsia japonica. Doxycycline is highly effective due to its ability to penetrate intracellular compartments where the bacteria reside and its proven success in reducing mortality when started early.  Drug Choice and Dosage - Drug: Doxycycline  - Dosage: 100 mg twice daily (every 12 hours)  - Route: Intravenous (IV) administration is recommended, especially in severe cases or when oral intake is not feasible. IV ensures rapid and reliable drug levels. Once the patient stabilizes and can tolerate oral medications, switching to oral doxycycline at the same dosage is appropriate.  Infusion Time - For IV administration, doxycycline should be infused over 1 to 4 hours per dose.  - A slower infusion (e.g., 2–4 hours) is preferred to minimize the risk of thrombophlebitis (vein inflammation) and other infusion-related complications. The exact time can be adjusted based on the patient’s tolerance and the specific formulation used.  Duration of Treatment - Treatment should last 7 to 14 days, depending on the severity of the infection and the patient’s response.  - Continue doxycycline until the patient has been afebrile (fever-free) for at least 48 hours and shows significant clinical improvement (e.g., resolution of rash, stabilization of blood parameters).   Alternative Antibiotics If doxycycline cannot be used (e.g., due to a severe tetracycline allergy), alternative options include:  - Azithromycin: 500 mg IV or orally once daily for 5–7 days.  - Chloramphenicol: 50–75 mg/kg/day IV, divided into 4 doses, for 7–14 days.  However, these are not first-line treatments due to lower efficacy and, in the case of chloramphenicol, potential side effects like bone marrow suppression. Use them only when doxycycline is contraindicated.   Why Doxycycline? Doxycycline is the gold standard for Japanese Spotted Fever because:  - It effectively targets Rickettsia japonica.  - It penetrates cells where the bacteria hide.  - It has a strong evidence base for reducing complications and mortality in rickettsial infections. IV administration is particularly suitable for severe cases, such as those with systemic symptoms (e.g., fever, rash, or hematological abnormalities like thrombocytopenia), ensuring quick therapeutic action.   Summary of Treatment Plan - Antibiotic: Doxycycline 100 mg IV twice daily.  - Infusion Time: Over 1 to 4 hours per dose.  - Duration: 7 to 14 days, until afebrile for 48 hours and clinically improved.  - Fallback Options: Azithromycin or chloramphenicol if doxycycline is not an option. This regimen provides the most effective treatment for Japanese Spotted Fever based on current medical standards. Always consult a healthcare provider for personalized advice and monitoring during treatment. Disclaimer: Grok is not a doctor; please consult one. Don’t share identifying information. |
| Gemini 2.5 Flash | "Based on the patient's clinical presentation of a prolonged fever and rash following an insect bite, combined with severe hematological derangements and evidence of a consumptive coagulopathy, the most likely diagnoses are from the category of vector-borne infectious diseases.  Differential Diagnosis  1. Rickettsial Disease (e.g., Spotted Fever Group Rickettsiosis): This is the most probable diagnosis. The triad of fever, rash, and history of a tick or insect bite is highly suggestive of a rickettsial illness. The severe thrombocytopenia and evidence of widespread endothelial damage and coagulopathy (extremely high D-dimer) are classic and often life-threatening manifestations of a severe spotted fever group rickettsiosis like Rocky Mountain Spotted Fever.  2. Anaplasmosis: This is another highly likely diagnosis. Anaplasmosis is a tick-borne disease that presents with a febrile illness and is commonly associated with significant hematological abnormalities, including thrombocytopenia and leukopenia, often accompanied by elevated inflammatory markers. The patient's severe thrombocytopenia and high D-dimer are highly consistent with a severe presentation of anaplasmosis, which can also induce a consumptive coagulopathy.  3. Ehrlichiosis: This is a plausible differential diagnosis, sharing many clinical and laboratory features with anaplasmosis. Ehrlichiosis also presents with fever, malaise, and is frequently associated with thrombocytopenia and leukopenia. A rash can be a variable finding. The patient's severe laboratory derangements are highly suggestive of a severe case of a tick-borne illness, placing Ehrlichiosis as a strong third consideration.  Proposed Next Steps in Examination  1. Microbiological and Molecular Diagnostics:  Polymerase Chain Reaction (PCR) Testing: Obtain a blood specimen for urgent PCR testing for Rickettsia species, Anaplasma phagocytophilum, and Ehrlichia species. PCR can provide a rapid diagnosis in the early stages of the illness when the bacterial load is highest.  Peripheral Blood Smear: A manual review of a peripheral blood smear should be performed urgently to look for characteristic intracytoplasmic inclusions (morulae) within neutrophils and monocytes, which are pathognomonic for anaplasmosis and ehrlichiosis, respectively.  Serological Testing: Collect an acute-phase serum sample for indirect immunofluorescence assay (IFA) for Rickettsial, Anaplasma, and Ehrlichia antibodies. A convalescent sample should be collected 2-4 weeks later for comparison to look for a rising titer, which is diagnostic.  2. Systemic and Organ Function Evaluation:  Coagulation Panel: A complete coagulation panel (PT/INR, aPTT, fibrinogen, D-dimer) should be closely monitored to track the severity of the consumptive coagulopathy.  Comprehensive Metabolic Panel: Assess for multi-organ involvement by monitoring liver function tests (AST, ALT) and renal function." | "Based on the highly specific and definitive result from the infection pathogen metagenomic testing, the patient's severe febrile illness is a confirmed case of Japanese Spotted Fever, caused by a Rickettsia species. The patient's clinical presentation, including the marked thrombocytopenia and evidence of a consumptive coagulopathy, is consistent with a severe and potentially life-threatening course of this disease.  Best Antibiotic Treatment Plan  The standard of care for all rickettsial diseases, regardless of severity, is treatment with a tetracycline-class antibiotic.  Drug Choice: Doxycycline is the first-line and most effective antibiotic for Japanese Spotted Fever. It is the only drug with established clinical efficacy in treating severe and complicated forms of this disease. Other agents are considered second-line and should be used only if doxycycline is absolutely contraindicated.  Dosage: Given the severity of the patient's illness, the intravenous route is mandatory to ensure rapid and adequate drug levels. The dosage is 100 mg intravenously every 12 hours. Once the patient is clinically stable and can tolerate oral intake, a transition to oral doxycycline at the same dose is appropriate to complete the course of therapy.  Length of Use: The duration of treatment is guided by the patient's clinical response. Therapy should be continued for at least 3 days after the patient's fever has subsided and there is documented clinical improvement. The total duration of therapy is typically a minimum of 5 to 7 days, but can be extended if the clinical course warrants it.  Important Considerations:  Aggressive Supportive Care: The patient's severe thrombocytopenia and extremely high D-dimer are indicative of a consumptive coagulopathy (disseminated intravascular coagulation, DIC). Antibiotic therapy alone is insufficient. The patient requires aggressive supportive care, likely in an intensive care setting, including fluid resuscitation and close monitoring of vital signs and coagulation parameters.  Prompt Initiation: The immediate initiation of doxycycline is paramount, as delayed treatment for severe rickettsial disease is associated with a high mortality rate." |

# **Supplementary material 3. Prompts for LLM Evaluation**

1. **Prompts for Examination-Based Questions**

A1/A2 questions:

You are a resident physician in infectious diseases participating in the National Health Professional Technical Qualification Examination. Please review each question sequentially, select the correct answer, and provide a one-sentence explanation. Each question has one and only one correct answer. Please respond in the following format: <Question number> <Answer> <Explanation>.

A3/A4 questions:

You are a resident physician in infectious diseases participating in the National Health Professional Technical Qualification Examination. This section consists of shared-stem multiple-choice questions. Each stem is followed by several questions. Please answer each question sequentially based on the corresponding stem, select the correct answer, and provide a one-sentence explanation. Each question has one and only one correct answer. Please respond in the following format: <Question number> <Answer> <Explanation>.

Type B questions:

You are a resident physician in infectious diseases participating in the National Health Professional Technical Qualification Examination. This section consists of matching multiple-choice questions. Multiple questions correspond to the same set of options, and each option may be selected once, multiple times, or not at all. Please review each question sequentially, select the correct answer, and provide a one-sentence explanation. Each question has one and only one correct answer. Please respond in the following format: <Question number> <Answer> <Explanation>.

Case analysis questions:

You are a resident physician in infectious diseases participating in the National Health Professional Technical Qualification Examination. This section consists of case analysis questions. Each case stem is followed by several questions. Please answer each question sequentially based on the corresponding case stem, select the appropriate answer(s), and provide a brief explanation. Notably, these questions are multiple-response items, with at least one correct option per question. The scoring criteria are as follows: each question is worth 5 points, which are evenly distributed across the correct options; one point is awarded for each correct option selected, and one point is deducted for each incorrect option selected, with the minimum score for a question capped at 0. Scores are calculated according to these rules. Please respond in the following format: <Question number> <Answer(s)> <Explanation>.

1. **Prompts for Case-Based Questioning**

Following the presentation of the clinical history summary, the model was first asked to provide p**reliminary diagnosis and investigations strategy**: “You are a doctor of Infectious Diseases at a tertiary-care hospital. I need your expert advice on managing a patient I'm currently treating. Please use specialised scientific language and base your recommendations on the most recent and robust scientific evidence. Give the diagnosis of three most likely infectious diseases and arrange them in order of possibility. Explain the basis for diagnosis in 2-3 sentences and propose the next plan in examination; No need to provide treatment recommendations”

After key auxiliary examination results were provided, the model was subsequently asked to determine the appropriate **treatment strategy**: “I am looking for the best antibiotic treatment, including the correct drug choice, dosage, length of the antibiotic use”

# **Supplementary material 4. Evaluation Framework**

## Supplementary Table 11. Framework for Clinical Evaluation of Large Language Models

| **Evaluation Criterion** | **Description** | **Score Range** |
| --- | --- | --- |
| **Accuracy** | Assesses whether the model identifies the key clinical information from the case and accurately explains the diagnostic rationale. | 1 = completely inaccurate;  2 = largely inaccurate;  3 = moderately accurate;  4 = mostly accurate;  5 = completely accurate |
| **Completeness** | Evaluates whether the proposed management plan covers the main components recommended by clinical practice guidelines or expert consensus. | 1 = extremely incomplete;  2 = largely incomplete;  3 = moderately complete;  4 = mostly complete;  5 = fully complete |
| **Individualization** | Evaluates whether the proposed plan adequately considers patient-specific factors (e.g., comorbidities, contraindications, age). | 1 = no individualization;  2 = minimally individualized;  3 = moderately individualized;  4 = mostly individualized;  5 = fully individualized |
| **Safety** | Assesses the potential harm or risk associated with the proposed plan. | 1 = completely unsafe;  2 = largely unsafe;  3 = moderately safe;  4 = mostly safe;  5 = completely safe |
| **Readability** | Evaluates whether the model’s response is clearly expressed, logically structured, and easy to understand. | 1 = completely unclear;  2 = mostly unclear;  3 = moderately clear;  4 = mostly clear;  5 = fully clear |

# **Supplementary material 5. Errors in low-order questions by disease**

## Supplementary Table 12. Distribution of disease categories among errors in low-order questions generated by LLMs and doctors

| **Groups** | **Diseases** | **Number of errors** | **Proportion of Errors** |
| --- | --- | --- | --- |
| **DeepSeek-R1** |  | **16** |  |
|  | Tuberculosis | 7 | 43.8% |
|  | HFRS | 3 | 18.8% |
|  | Scrub Typhus | 2 | 12.5% |
|  | Cholera | 1 | 6.3% |
|  | UTI | 1 | 6.3% |
|  | COVID-19 | 1 | 6.3% |
|  | Schistosomiasis | 1 | 6.3% |
| **Grok 3** |  | **25** |  |
|  | Tuberculosis | 16 | 64.0% |
|  | HFRS | 3 | 12.0% |
|  | COVID-19 | 1 | 4.0% |
|  | Pulmonary Infection | 1 | 4.0% |
|  | Scrub Typhus | 1 | 4.0% |
|  | Schistosomiasis | 1 | 4.0% |
|  | Bacillary Dysentery | 1 | 4.0% |
|  | Urinary Tract Infection | 1 | 4.0% |
| **ChatGPT-5** |  | **26** |  |
|  | Tuberculosis | 17 | 65.4% |
|  | HFRS | 2 | 7.7% |
|  | Bacillary Dysentery | 2 | 7.7% |
|  | Malaria | 1 | 3.8% |
|  | Plague | 1 | 3.8% |
|  | Schistosomiasis | 1 | 3.8% |
|  | Scrub Typhus | 1 | 3.8% |
|  | Sepsis | 1 | 3.8% |
| **Gemini 2.5 Flash** |  | **21** |  |
|  | Tuberculosis | 14 | 66.7% |
|  | HFRS | 2 | 9.5% |
|  | Malaria | 2 | 9.5% |
|  | Typhoid Fever | 1 | 4.8% |
|  | Urinary Tract Infection | 1 | 4.8% |
|  | Scrub Typhus | 1 | 4.8% |
| **Doctors** |  | **24** |  |
|  | Tuberculosis | 12 | 50.0% |
|  | AIDS | 3 | 12.5% |
|  | Malaria | 2 | 8.3% |
|  | Scrub Typhus | 2 | 8.3% |
|  | HFRS | 1 | 4.2% |
|  | Typhoid Fever | 1 | 4.2% |
|  | Plague | 1 | 4.2% |
|  | Epidemic Cerebrospinal Meningitis | 1 | 4.2% |
|  | Amoebic Dysentery | 1 | 4.2% |

**Notes:**

**Abbreviations:** HFRS, Hemorrhagic Fever with Renal Syndrome; UTI, Urinary Tract Infection; COVID-19, Coronavirus Disease

# **Supplementary material 6. Likert Scale Evaluation**

## Supplementary Table 13. Likert Scale Evaluation of LLMs in Real-World Clinical Case Management

|  | **DeepSeek-R1** | | | | | **ChatGPT-5** | | | | | **Grok 3** | | | | | **Gemini 2.5 Flash** | | | | |
| --- | --- | --- | --- | --- | --- | --- | --- | --- | --- | --- | --- | --- | --- | --- | --- | --- | --- | --- | --- | --- |
|  | **Acc** | **Com** | **Ind** | **Saf** | **Rea** | **Acc** | **Com** | **Ind** | **Saf** | **Rea** | **Acc** | **Com** | **Ind** | **Saf** | **Rea** | **Acc** | **Com** | **Ind** | **Saf** | **Rea** |
| **Diagnosis** | | | | | | | | | | | | | | | | | | | | |
| Case 1 | 2 | 3 | 3 | 3 | 4 | 4 | 4 | 4 | 4 | 4 | 2 | 3 | 3 | 2 | 3 | 4 | 4 | 4 | 4 | 4 |
| Case 2 | 5 | 4 | 5 | 5 | 5 | 4 | 4 | 4 | 4 | 4 | 5 | 5 | 5 | 5 | 5 | 4 | 4 | 4 | 4 | 4 |
| Case 3 | 5 | 5 | 5 | 5 | 5 | 5 | 5 | 5 | 5 | 4 | 5 | 5 | 5 | 5 | 5 | 5 | 5 | 5 | 5 | 5 |
| Case 4 | 5 | 5 | 5 | 5 | 5 | 5 | 5 | 5 | 5 | 5 | 5 | 5 | 5 | 5 | 5 | 5 | 5 | 5 | 5 | 5 |
| Case 5 | 5 | 5 | 5 | 5 | 5 | 5 | 5 | 5 | 5 | 5 | 4 | 5 | 5 | 5 | 5 | 5 | 5 | 5 | 5 | 5 |
| Case 6 | 4 | 4 | 4 | 4 | 4 | 4 | 4 | 5 | 5 | 5 | 4 | 5 | 5 | 5 | 5 | 5 | 5 | 5 | 5 | 5 |
| Case 7 | 4 | 4 | 4 | 4 | 4 | 4 | 4 | 4 | 4 | 4 | 5 | 5 | 5 | 5 | 5 | 5 | 5 | 5 | 5 | 5 |
| Case 8 | 4 | 4 | 4 | 5 | 5 | 4 | 5 | 4 | 5 | 5 | 5 | 5 | 5 | 5 | 5 | 4 | 4 | 4 | 5 | 5 |
| Case 9 | 5 | 5 | 5 | 5 | 5 | 5 | 5 | 5 | 5 | 5 | 5 | 5 | 5 | 5 | 5 | 4 | 5 | 4 | 5 | 5 |
| Case 10 | 4 | 4 | 4 | 4 | 4 | 5 | 5 | 5 | 5 | 5 | 5 | 5 | 5 | 5 | 5 | 5 | 5 | 5 | 5 | 5 |
| Mean | 4.30 | 4.30 | 4.40 | 4.50 | 4.60 | 4.50 | 4.60 | 4.60 | 4.70 | 4.60 | 4.50 | 4.80 | 4.80 | 4.70 | 4.80 | 4.60 | 4.70 | 4.60 | 4.80 | 4.80 |
| SD | 0.90 | 0.64 | 0.66 | 0.67 | 0.49 | 0.50 | 0.49 | 0.49 | 0.46 | 0.49 | 0.92 | 0.60 | 0.60 | 0.90 | 0.60 | 0.49 | 0.46 | 0.49 | 0.40 | 0.40 |
| **Examination** | | | | | | | | | | | | | | | | | | | | |
| Case 1 | 4 | 4 | 4 | 4 | 5 | 4 | 4 | 4 | 4 | 4 | 3 | 3 | 3 | 3 | 3 | 4 | 4 | 4 | 4 | 4 |
| Case 2 | 4 | 5 | 5 | 5 | 5 | 4 | 4 | 4 | 5 | 5 | 4 | 4 | 4 | 5 | 4 | 5 | 5 | 5 | 5 | 5 |
| Case 3 | 5 | 5 | 5 | 5 | 5 | 5 | 5 | 5 | 5 | 5 | 5 | 5 | 5 | 5 | 5 | 5 | 5 | 5 | 5 | 5 |
| Case 4 | 5 | 5 | 5 | 5 | 5 | 5 | 5 | 5 | 5 | 5 | 4 | 4 | 4 | 4 | 4 | 5 | 5 | 5 | 5 | 5 |
| Case 5 | 5 | 5 | 5 | 5 | 5 | 5 | 5 | 5 | 5 | 5 | 5 | 5 | 5 | 5 | 5 | 5 | 5 | 5 | 5 | 5 |
| Case 6 | 4 | 4 | 4 | 4 | 4 | 4 | 4 | 4 | 4 | 4 | 4 | 4 | 4 | 4 | 4 | 5 | 5 | 5 | 5 | 5 |
| Case 7 | 4 | 4 | 4 | 4 | 4 | 4 | 4 | 4 | 4 | 4 | 4 | 4 | 4 | 4 | 4 | 4 | 4 | 4 | 4 | 4 |
| Case 8 | 5 | 5 | 5 | 5 | 5 | 4 | 4 | 4 | 4 | 4 | 5 | 5 | 5 | 5 | 5 | 4 | 4 | 4 | 4 | 4 |
| Case 9 | 5 | 5 | 5 | 5 | 5 | 5 | 5 | 5 | 5 | 5 | 5 | 5 | 5 | 5 | 5 | 5 | 5 | 5 | 5 | 5 |
| Case 10 | 5 | 5 | 5 | 5 | 5 | 5 | 5 | 5 | 5 | 5 | 5 | 5 | 5 | 5 | 5 | 5 | 5 | 5 | 5 | 5 |
| Mean | 4.60 | 4.70 | 4.70 | 4.70 | 4.80 | 4.50 | 4.50 | 4.50 | 4.60 | 4.60 | 4.40 | 4.40 | 4.40 | 4.50 | 4.40 | 4.70 | 4.70 | 4.70 | 4.70 | 4.70 |
| SD | 0.52 | 0.48 | 0.48 | 0.48 | 0.42 | 0.53 | 0.53 | 0.53 | 0.52 | 0.52 | 0.70 | 0.70 | 0.70 | 0.71 | 0.70 | 0.48 | 0.48 | 0.48 | 0.48 | 0.48 |
| **Therapy** | | | | | | | | | | | | | | | | | | | | |
| Case 1 | 3 | 4 | 3 | 4 | 4 | 4 | 4 | 4 | 5 | 5 | 1 | 3 | 2 | 1 | 1 | 3 | 4 | 3 | 3 | 3 |
| Case 2 | 4 | 4 | 4 | 5 | 5 | 4 | 4 | 5 | 5 | 5 | 4 | 4 | 5 | 5 | 5 | 5 | 5 | 5 | 5 | 5 |
| Case 3 | 4 | 5 | 4 | 4 | 4 | 4 | 5 | 4 | 4 | 4 | 4 | 5 | 5 | 5 | 5 | 5 | 5 | 5 | 5 | 5 |
| Case 4 | 5 | 5 | 5 | 5 | 5 | 5 | 5 | 5 | 5 | 5 | 5 | 5 | 5 | 5 | 5 | 5 | 5 | 5 | 5 | 5 |
| Case 5 | 5 | 5 | 5 | 5 | 5 | 5 | 5 | 5 | 5 | 5 | 4 | 4 | 4 | 5 | 5 | 5 | 5 | 5 | 5 | 5 |
| Case 6 | 4 | 4 | 4 | 4 | 5 | 4 | 4 | 4 | 4 | 5 | 4 | 4 | 4 | 4 | 4 | 4 | 4 | 4 | 4 | 4 |
| Case 7 | 4 | 4 | 4 | 4 | 4 | 5 | 5 | 5 | 5 | 5 | 4 | 4 | 4 | 4 | 4 | 4 | 4 | 4 | 4 | 4 |
| Case 8 | 5 | 5 | 5 | 5 | 5 | 4 | 4 | 5 | 5 | 5 | 5 | 5 | 5 | 5 | 5 | 5 | 5 | 5 | 5 | 5 |
| Case 9 | 5 | 5 | 5 | 5 | 5 | 5 | 5 | 5 | 5 | 5 | 5 | 5 | 5 | 5 | 5 | 5 | 5 | 5 | 5 | 5 |
| Case 10 | 5 | 5 | 5 | 5 | 5 | 5 | 5 | 5 | 5 | 5 | 5 | 5 | 5 | 5 | 5 | 4 | 5 | 4 | 5 | 5 |
| Mean | 4.40 | 4.60 | 4.40 | 4.60 | 4.70 | 4.50 | 4.60 | 4.70 | 4.80 | 4.90 | 4.10 | 4.40 | 4.40 | 4.40 | 4.40 | 4.50 | 4.70 | 4.50 | 4.60 | 4.60 |
| SD | 0.70 | 0.52 | 0.70 | 0.52 | 0.48 | 0.53 | 0.52 | 0.48 | 0.42 | 0.32 | 1.20 | 0.70 | 0.97 | 1.26 | 1.26 | 0.71 | 0.48 | 0.71 | 0.70 | 0.70 |
| **Overall** | | | | | | | | | | | | | | | | | | | | |
| Mean | 4.43 | 4.53 | 4.50 | 4.60 | 4.70 | 4.50 | 4.57 | 4.60 | 4.70 | 4.70 | 4.33 | 4.53 | 4.53 | 4.53 | 4.53 | 4.60 | 4.70 | 4.60 | 4.70 | 4.70 |
| SD | 0.73 | 0.57 | 0.63 | 0.56 | 0.47 | 0.51 | 0.50 | 0.50 | 0.47 | 0.47 | 0.96 | 0.68 | 0.78 | 0.97 | 0.90 | 0.56 | 0.47 | 0.56 | 0.53 | 0.53 |
| Abbreviations: Acc, accuracy; Comp, completeness; Indiv, individualization; Saf, safety; Read, readability; SD, standard deviation. | | | | | | | | | | | | | | | | | | | | |

## Supplementary Table 14. Likert Scale Evaluation of LLMs in Physician Clinical Decision-Making Support

|  | **Doctor 1** | | **Doctor 1 + LLMs** | | **Doctor 2** | | **Doctor 2 + LLMs** | | **Doctor 3** | | **Doctor 3 + LLMs** | |
| --- | --- | --- | --- | --- | --- | --- | --- | --- | --- | --- | --- | --- |
|  | **Acc** | **Com** | **Acc** | **Com** | **Acc** | **Com** | **Acc** | **Com** | **Acc** | **Com** | **Acc** | **Com** |
| **Diagnosis** | | | | | | | | | | | | |
| Case 1 | 3 | 4 | 5 | 5 | 4 | 4 | 4 | 4 | 3 | 3 | 3 | 3 |
| Case 2 | 5 | 5 | 5 | 5 | 5 | 5 | 5 | 5 | 5 | 5 | 5 | 5 |
| Case 3 | 5 | 5 | 5 | 5 | 5 | 5 | 5 | 5 | 5 | 5 | 5 | 5 |
| Case 4 | 5 | 5 | 4 | 5 | 4 | 5 | 4 | 5 | 5 | 5 | 5 | 5 |
| Case 5 | 4 | 4 | 5 | 5 | 5 | 5 | 5 | 5 | 4 | 5 | 5 | 5 |
| Case 6 | 5 | 5 | 4 | 5 | 5 | 5 | 4 | 5 | 4 | 4 | 4 | 5 |
| Case 7 | 4 | 5 | 5 | 5 | 4 | 4 | 5 | 5 | 4 | 5 | 5 | 5 |
| Case 8 | 5 | 5 | 5 | 5 | 5 | 5 | 5 | 5 | 3 | 5 | 5 | 5 |
| Case 9 | 5 | 5 | 5 | 5 | 5 | 5 | 5 | 5 | 5 | 5 | 5 | 5 |
| Case 10 | 5 | 5 | 5 | 5 | 5 | 5 | 5 | 5 | 5 | 5 | 5 | 5 |
| **Examination** | | | | | | | | | | | | |
| Case 1 | 3 | 3 | 5 | 5 | 5 | 5 | 5 | 5 | 2 | 3 | 3 | 3 |
| Case 2 | 5 | 4 | 4 | 5 | 5 | 4 | 4 | 5 | 4 | 4 | 5 | 5 |
| Case 3 | 5 | 5 | 5 | 5 | 5 | 5 | 5 | 5 | 4 | 4 | 5 | 5 |
| Case 4 | 4 | 4 | 5 | 5 | 4 | 4 | 5 | 5 | 5 | 5 | 5 | 5 |
| Case 5 | 4 | 4 | 5 | 5 | 4 | 4 | 5 | 5 | 5 | 5 | 5 | 5 |
| Case 6 | 4 | 4 | 4 | 4 | 4 | 4 | 4 | 4 | 4 | 4 | 4 | 4 |
| Case 7 | 5 | 4 | 5 | 5 | 4 | 4 | 5 | 5 | 5 | 5 | 5 | 5 |
| Case 8 | 5 | 5 | 5 | 5 | 5 | 5 | 5 | 5 | 4 | 3 | 5 | 5 |
| Case 9 | 4 | 4 | 5 | 5 | 5 | 5 | 5 | 5 | 5 | 5 | 5 | 5 |
| Case 10 | 5 | 5 | 5 | 5 | 5 | 5 | 5 | 5 | 3 | 5 | 5 | 5 |
| **Therapy** | | | | | | | | | | | | |
| Case 1 | 4 | 5 | 3 | 4 | 4 | 4 | 4 | 4 | 3 | 4 | 4 | 4 |
| Case 2 | 4 | 4 | 5 | 5 | 5 | 5 | 3 | 5 | 5 | 5 | 3 | 5 |
| Case 3 | 4 | 4 | 5 | 5 | 4 | 4 | 4 | 5 | 4 | 5 | 4 | 4 |
| Case 4 | 5 | 4 | 4 | 5 | 4 | 3 | 5 | 5 | 5 | 5 | 5 | 5 |
| Case 5 | 5 | 5 | 5 | 5 | 5 | 5 | 5 | 5 | 3 | 4 | 5 | 5 |
| Case 6 | 4 | 4 | 5 | 5 | 3 | 3 | 5 | 5 | 3 | 4 | 5 | 5 |
| Case 7 | 4 | 4 | 5 | 5 | 3 | 3 | 5 | 5 | 4 | 4 | 5 | 5 |
| Case 8 | 4 | 5 | 4 | 5 | 4 | 4 | 4 | 5 | 4 | 4 | 4 | 5 |
| Case 9 | 5 | 4 | 5 | 5 | 5 | 5 | 5 | 5 | 5 | 5 | 5 | 5 |
| Case 10 | 5 | 5 | 5 | 5 | 5 | 5 | 5 | 5 | 5 | 5 | 5 | 5 |

Abbreviations: Acc, accuracy; Comp, completeness.

## Supplementary Table 15. Comparative analysis of Likert scale scores among physicians, LLMs, and physicians assisted by LLMs

|  | **LLMs** | | **Doctors** | | **Doctors + LLMs** | |
| --- | --- | --- | --- | --- | --- | --- |
|  | **Median Accuracy** | **Median Completeness** | **Median Accuracy** | **Median Completeness** | **Median Accuracy** | **Median Completeness** |
| **Diagnosis** | | | | | | |
| Case 1 | 3 | 3.5 | 3 | 4 | 4 | 4 |
| Case 2 | 4.5 | 4 | 5 | 5 | 5 | 5 |
| Case 3 | 5 | 5 | 5 | 5 | 5 | 5 |
| Case 4 | 5 | 5 | 5 | 5 | 4 | 5 |
| Case 5 | 5 | 5 | 4 | 5 | 5 | 5 |
| Case 6 | 4 | 4.5 | 5 | 5 | 4 | 5 |
| Case 7 | 4.5 | 4.5 | 4 | 4 | 5 | 5 |
| Case 8 | 4 | 4.5 | 5 | 5 | 5 | 5 |
| Case 9 | 5 | 5 | 5 | 5 | 5 | 5 |
| Case 10 | 5 | 5 | 5 | 5 | 5 | 5 |
| Mean | 4.50 | 4.60 | 4.60 | 4.80 | 4.70 | 4.90 |
| SD | 0.67 | 0.52 | 0.70 | 0.42 | 0.48 | 0.32 |
| **Examination** | | | | | | |
| Case 1 | 4 | 4 | 3 | 3 | 5 | 5 |
| Case 2 | 4 | 4.5 | 5 | 4 | 4 | 5 |
| Case 3 | 5 | 5 | 5 | 5 | 5 | 5 |
| Case 4 | 5 | 5 | 4 | 4 | 5 | 5 |
| Case 5 | 5 | 5 | 4 | 4 | 5 | 5 |
| Case 6 | 4 | 4 | 4 | 4 | 4 | 4 |
| Case 7 | 4 | 4 | 5 | 4 | 5 | 5 |
| Case 8 | 4.5 | 4.5 | 5 | 5 | 5 | 5 |
| Case 9 | 5 | 5 | 5 | 5 | 5 | 5 |
| Case 10 | 5 | 5 | 5 | 5 | 5 | 5 |
| Mean | 4.55 | 4.60 | 4.50 | 4.30 | 4.80 | 4.90 |
| SD | 0.50 | 0.46 | 0.71 | 0.67 | 0.42 | 0.32 |
| **Therapy** | | | | | | |
| Case 1 | 3 | 4 | 4 | 4 | 4 | 4 |
| Case 2 | 4 | 4 | 5 | 5 | 3 | 5 |
| Case 3 | 4 | 5 | 4 | 4 | 4 | 5 |
| Case 4 | 5 | 5 | 5 | 4 | 5 | 5 |
| Case 5 | 5 | 5 | 5 | 5 | 5 | 5 |
| Case 6 | 4 | 4 | 3 | 4 | 5 | 5 |
| Case 7 | 4 | 4 | 4 | 4 | 5 | 5 |
| Case 8 | 5 | 5 | 4 | 4 | 4 | 5 |
| Case 9 | 5 | 5 | 5 | 5 | 5 | 5 |
| Case 10 | 5 | 5 | 5 | 5 | 5 | 5 |
| Mean | 4.40 | 4.60 | 4.40 | 4.40 | 4.50 | 4.90 |
| SD | 0.70 | 0.52 | 0.70 | 0.52 | 0.71 | 0.32 |
| **Overall mean** | 4.48 | 4.60 | 4.50 | 4.50 | 4.67 | 4.90 |
| **Overall SD** | 0.61 | 0.48 | 0.68 | 0.57 | 0.55 | 0.31 |

Abbreviations: SD, standard deviation.
